# Supplementary material for: A narrow therapeutic window of platelet P2Y12 reactivity in high-risk Chinese percutaneous coronary intervention patients
Source: PeerJ. 2026 Jan 9;14:e20536. doi: 10.7717/peerj.20536 (PMC12794635; doi:10.7717/peerj.20536)
Supplement: Supplemental Information 1 [file peerj-14-20536-s001.xlsx]

## Sheet: patients_all_update
DN(number)	SEX(1=M 2=F)	age(y)	age over 75y	HEG(height)	WEG(weight)	weight below 50	BMI(body mass index,kg/m2)	diagnosis	Unstable angina pectoris	Non-ST-segment elevation myocardial infarction	ST-segment elevation myocardial infarction	stable angina(1=yes 0=no)	SBP(systolic blood pressure)	DBP(diastolic blood pressure)	CKD（chronic kidney disease,1=yes 0=no)）	PVD(peripheral vascular disease,1=yes 0=no)	diabetes mellitus（1=yes 0=no)	heart failure（1=yes 0=no)	cardiogenic shock（1=yes 0=no)	hypertention(1=yes 0=no)	Previous percutaneous Coronary Intervention(1=yes 0=no)	Previous coronary artery bypass grafting(1=yes 0=no)	TIA(transient ischemic attack，1=yes,0=no)	DRK（drinker 1=yes 0=no）	SMK（smokers. 1=yes 0=no）	eGFR below 60 (ml/min/1.73m2)	Aaspirin(1=yes 0=no)	clopidogrel(1=yes 0=no)	ticagrelor(1=yes 0=no)	C to T（clopidogrel change to ticagrelor）	T to C（ticagrelor change to clopidogrel ）	angiotensin-converting enzyme inhibitor(1=yes 0=no)	angiotensin receptor blocker(1=yes 0-no)	Beta-blocker(1=yes 0=no)	Calcium antagonist(1=yes 0=no)	Statins(1=yes 0=no)	GPIIb/IIIa inhibitors(1=yes 0=no)	Nitrates(1=yes 0=no)	Cardiotonic drugs(1=yes 0=no)	diuretic(1=yes 0=no)	Proton pump inhibitor(1=yes 0=no)	antidiabetic(1=yes 0=no)	morphine(1=yes 0=no)	Iohexol(1=yes 0=no)	iodixanol(1=yes 0=no)	Iohexol and iodixanol(1=yes 0=no)	IABP(1=yes 0=no)	Number of coronary artery lesion branches	Left main artery
100	1	50	0	1.78	82.6	0	26.1	1	1	0	0	0	160	98	0	0	0	0	0	1	0	0	0	1	3	0	1	1	0	0	0	1	0	1	1	1	0	1	0	0	0	0	0	1	0	0	0	3	0
101	2	58	0	1.6	58.8	1	23	2	0	1	0	0	140	86	0	0	1	0	0	1	0	0	0	1	1	0	1	1	0	0	0	0	0	1	0	1	0	0	0	0	1	0	0	1	0	0	0	1	0
102	2	70	0	1.63	62.5	0	23.5	1	1	0	0	0	129	65	0	0	1	0	0	1	0	0	0	1	1	0	1	1	0	0	0	1	0	1	1	1	1	1	0	0	1	1	0	1	0	0	0	1	0
103	2	62	0	1.56	61	0	25.1	4	0	0	1	0	86	60	0	0	0	0	0	1	0	0	0	1	1	0	1	0	1	0	0	1	0	1	0	1	0	1	0	0	1	0	0	1	0	0	0	3	0
105	1	77	1	1.76	78	0	25.2	1	1	0	0	0	164	84	0	1	0	0	0	1	0	0	0	1	3	0	1	1	0	0	0	1	0	1	0	1	0	1	1	0	1	0	0	1	0	0	0	3	0
106	2	68	0	1.54	53.4	1	22.5	2	0	1	0	0	160	90	0	0	0	1	0	0	0	0	0	1	1	0	1	1	0	0	0	1	0	1	0	1	0	1	0	0	1	0	0	1	1	1	0	3	0
107	1	64	0	1.65	54	1	19.8	4	0	0	1	0	97	61	0	1	0	0	0	0	0	0	0	1	3	0	1	1	0	0	0	1	0	0	0	1	0	0	0	0	1	0	0	1	0	0	0	3	0
108	1	52	0	1.74	67.8	0	22.4	3	0	0	0	1	140	90	0	1	0	0	0	0	0	0	1	1	1	0	1	1	0	0	0	1	0	1	0	1	0	0	0	0	0	0	0	1	0	0	0	1	0
109	1	52	0	1.68	84	0	29.8	1	1	0	0	0	124	80	0	0	1	0	0	0	1	0	0	1	3	0	1	1	0	0	0	0	0	1	0	1	1	1	0	0	1	1	0	1	0	0	0	3	0
110	1	56	0	1.65	46	1	16.9	4	0	0	1	0	109	48	0	0	0	0	0	1	0	0	0	3	3	0	1	0	1	0	0	0	0	0	0	1	1	0	0	0	1	0	0	1	0	0	0	3	0
111	1	38	0	1.67	72.7	0	26.1	2	0	1	0	0	140	92	0	1	0	0	0	0	0	0	0	1	3	0	1	1	0	0	0	1	0	1	0	1	1	0	0	0	1	0	0	1	0	0	0	1	0
112	2	59	0	1.55	49.1	1	20.4	1	1	0	0	0	130	80	0	0	1	0	0	0	0	0	0	1	1	0	1	1	0	0	0	0	0	0	0	1	0	0	0	0	1	0	0	1	0	0	0	1	0
114	2	77	1	1.56	62	0	25.5	4	0	0	1	0	110	56	0	0	0	0	0	1	1	0	0	1	1	0	1	1	0	0	0	0	1	0	0	1	1	0	0	0	1	0	0	1	0	0	0	3	0
115	1	48	0	1.64	72	0	26.8	1	1	0	0	0	136	96	0	0	1	0	0	1	0	0	0	3	3	0	1	1	0	0	0	1	0	0	1	1	1	0	0	0	1	0	0	1	0	0	0	3	0
116	1	71	0	1.63	72.5	0	27.3	4	0	0	1	0	167	77	0	0	0	0	0	1	1	0	1	3	3	0	1	1	0	0	0	1	0	1	0	1	1	1	0	0	1	0	0	1	0	0	0	3	0
117	1	59	0	1.62	62.7	0	23.9	4	0	0	1	0	158	92	0	0	1	0	0	1	0	0	0	3	3	0	1	0	1	0	0	1	0	1	0	1	0	0	0	0	1	0	0	1	0	0	0	2	0
118	2	57	0	1.58	75	0	30	1	1	0	0	0	128	86	0	1	1	0	0	1	0	0	0	1	1	0	1	1	0	0	0	1	0	1	1	1	1	0	0	0	1	1	0	1	0	0	0	3	0
120	2	75	1	1.6	65	0	25.4	4	0	0	1	0	129	66	0	1	0	0	0	1	0	0	1	1	3	0	1	1	0	0	0	1	0	1	0	1	0	1	0	0	1	0	0	1	0	0	0	1	0
121	1	63	0	1.65	75	0	27.5	3	0	0	0	1	146	86	0	1	1	0	0	1	1	0	0	1	1	1	1	1	0	0	0	0	1	1	0	1	1	0	0	0	1	0	0	1	0	0	0	3	0
122	1	80	1	1.8	80	0	24.7	3	0	0	0	1	148	80	0	1	1	0	0	1	1	0	1	1	3	NA	1	1	0	0	0	0	1	1	1	1	1	0	0	0	1	1	0	1	0	0	0	3	0
123	1	63	0	1.67	79	0	28.3	1	1	0	0	0	111	57	0	1	0	0	0	1	0	0	1	1	1	0	1	1	0	0	0	1	0	1	1	1	1	1	0	0	1	0	0	1	0	0	0	3	0
124	1	58	0	1.72	63.5	0	21.5	1	1	0	0	0	150	98	0	0	0	0	0	1	0	0	0	3	3	0	1	0	1	0	0	0	0	0	1	1	0	0	0	0	1	0	0	1	0	0	0	1	0
125	2	59	0	1.57	57	1	23.1	1	1	0	0	0	130	80	0	1	0	0	0	1	0	0	0	1	1	NA	1	1	0	0	0	0	0	1	1	1	0	0	0	0	1	0	0	1	0	0	0	2	0
126	2	67	0	1.52	64	0	27.7	1	1	0	0	0	126	78	0	0	0	1	0	1	0	0	0	1	1	0	1	1	0	0	0	0	0	1	1	1	0	0	0	0	1	0	0	1	0	0	0	2	0
128	1	66	0	1.72	75	0	25.4	2	0	1	0	0	140	90	0	0	1	0	0	0	0	0	0	3	3	0	1	1	0	0	0	0	0	1	0	1	0	0	0	0	1	1	0	1	0	0	0	3	0
130	1	60	0	1.66	80	0	29	4	0	0	1	0	153	102	0	0	1	1	0	1	0	0	0	1	1	0	1	0	1	0	0	1	0	1	1	1	1	1	1	0	1	1	0	1	0	0	0	1	0
131	2	58	0	1.5	56	1	24.9	1	1	0	0	0	120	70	0	0	1	0	0	0	0	0	0	1	1	0	1	1	0	0	0	1	0	1	0	1	0	1	0	0	1	1	0	1	0	0	0	3	0
132	2	77	1	1.62	66.1	0	25.2	1	1	0	0	0	158	90	0	1	0	0	0	1	0	0	1	1	1	1	1	1	0	0	0	1	0	1	0	1	0	0	0	0	1	0	0	1	0	0	0	1	0
133	2	73	0	1.52	50	1	21.6	1	1	0	0	0	148	88	0	0	1	0	0	0	0	0	0	1	1	0	1	1	0	0	0	1	0	1	0	1	0	1	0	0	0	0	0	1	0	0	0	1	0
134	1	48	0	1.75	79	0	25.8	2	0	1	0	0	110	78	0	0	0	0	0	1	0	0	0	1	1	0	1	1	0	0	0	0	1	1	1	1	0	0	0	0	1	0	0	1	1	1	0	3	0
135	2	56	0	1.53	59.1	1	25.2	1	1	0	0	0	153	88	0	0	1	0	0	1	0	0	0	1	1	0	1	1	0	0	0	1	0	1	1	1	0	1	0	0	0	1	0	1	0	0	0	3	0
136	2	72	0	1.55	45	1	18.7	1	1	0	0	0	160	90	0	0	0	1	0	1	0	0	0	1	1	0	1	1	0	0	0	1	0	1	1	1	0	1	1	1	1	0	0	1	0	0	0	3	0
137	2	59	0	1.55	45	1	18.7	4	0	0	1	0	140	54	0	0	1	0	0	0	0	0	0	1	2	0	1	1	0	0	0	1	0	0	0	1	1	0	0	0	1	1	0	1	0	0	0	2	0
138	1	76	1	1.73	64	0	21.4	1	1	0	0	0	122	76	0	0	0	0	0	1	1	1	1	3	2	0	1	1	0	0	0	0	1	1	0	1	0	1	0	1	1	0	0	1	1	1	0	3	0
139	1	65	0	1.73	82.3	0	27.5	4	0	0	1	0	106	70	1	0	1	1	0	1	0	0	0	2	3	0	1	1	0	0	0	0	0	1	0	1	0	1	1	1	0	0	0	1	1	1	0	3	0
140	1	66	0	1.6	72	0	28.1	1	1	0	0	0	160	110	0	0	1	0	0	1	0	0	0	1	1	0	1	0	1	0	0	1	0	1	1	1	1	1	0	0	0	1	0	1	1	1	0	3	0
141	1	65	0	1.66	63	0	22.9	4	0	0	1	0	125	70	0	1	0	1	0	1	0	0	0	3	3	1	1	0	1	0	0	0	0	1	0	1	1	0	1	1	1	0	1	1	0	0	0	3	0
143	1	62	0	1.65	60.9	0	22.4	4	0	0	1	0	121	71	0	0	1	1	0	1	0	0	1	1	2	0	1	1	0	0	0	1	0	1	0	1	0	0	1	1	1	1	0	1	0	0	0	3	0
144	1	64	0	1.72	75.8	0	25.6	5	0	0	0	1	140	70	1	1	1	0	0	1	0	1	0	1	2	0	1	1	0	0	0	0	1	1	0	1	1	1	0	0	1	0	0	1	1	1	0	4	1
145	2	80	1	1.5	64.5	0	28.7	1	1	0	0	0	150	90	0	0	1	0	0	1	0	0	0	1	1	0	1	1	0	0	0	1	0	1	1	1	0	0	0	0	1	1	0	1	1	1	0	3	0
146	1	50	0	1.58	87.6	0	35.1	1	1	0	0	0	146	110	0	0	1	0	0	1	0	0	0	2	2	0	1	1	0	0	0	0	1	1	1	1	0	1	0	0	1	0	0	1	0	0	0	2	0
147	2	68	0	1.6	65	0	25.4	1	1	0	0	0	120	70	1	0	1	0	0	1	0	0	0	1	1	1	1	1	0	0	0	1	0	1	0	1	0	1	0	0	1	1	0	0	1	0	0	1	0
148	1	66	0	1.72	75	0	25.4	2	0	1	0	0	140	90	0	0	1	0	0	0	0	0	0	3	3	0	1	1	0	0	0	0	0	1	0	1	0	0	0	0	1	1	0	1	0	0	0	3	0
149	1	59	0	1.68	58	1	20.5	5	0	0	0	1	124	80	1	1	1	1	0	0	0	0	0	3	2	0	1	1	0	0	0	1	0	1	0	1	1	0	0	1	1	0	0	1	0	0	0	2	0
150	2	57	0	1.56	54	1	22.2	4	0	0	1	0	129	79	0	0	0	0	0	0	0	0	0	3	1	0	1	0	1	0	0	0	0	1	0	1	1	0	0	0	1	0	0	1	0	0	0	1	0
152	2	73	0	1.55	60	0	25	1	1	0	0	0	135	80	0	1	1	0	0	1	1	0	1	1	1	0	1	0	1	0	0	1	0	1	0	1	0	0	0	1	1	0	0	1	0	0	0	3	0
153	2	46	0	1.58	53	1	21.2	4	0	0	1	0	158	86	0	1	0	0	0	1	0	0	0	3	1	0	1	1	0	0	0	1	0	1	1	1	0	1	0	0	1	0	0	1	0	0	0	1	0
154	2	75	1	1.64	65	0	24.2	2	0	1	0	0	186	80	0	1	1	0	0	1	0	0	0	1	1	0	1	0	1	0	0	0	1	1	1	1	0	0	0	0	1	1	0	1	1	1	0	3	0
155	1	50	0	1.53	48.1	1	20.5	1	1	0	0	0	102	78	0	1	1	0	0	0	0	0	0	1	1	0	1	1	0	0	0	1	0	1	0	1	0	0	0	0	1	1	0	1	0	0	0	2	0
156	1	66	0	1.65	74.5	0	27.4	1	1	0	0	0	178	82	0	0	1	0	0	1	0	0	0	1	1	0	1	1	0	1	0	0	1	1	1	1	1	0	0	0	1	1	0	1	0	0	0	4	0
157	1	59	0	1.7	62.5	0	21.6	3	0	0	0	1	140	85	1	0	0	1	0	1	1	0	0	2	2	1	1	0	1	0	0	1	0	1	1	1	0	1	1	1	1	0	0	0	1	0	0	3	0
158	1	65	0	1.7	75	0	26	1	1	0	0	0	146	82	0	0	1	0	0	1	0	0	0	3	3	0	1	1	0	0	0	1	0	1	1	1	0	0	0	0	1	0	0	1	0	0	0	2	0
160	1	66	0	1.65	66.5	0	24.4	1	1	0	0	0	143	85	0	1	1	0	0	0	1	0	0	1	3	0	1	1	0	0	0	1	0	1	0	1	0	1	0	0	1	1	0	0	1	0	0	3	0
161	1	76	1	1.69	63.5	0	22.2	3	0	0	0	1	140	80	0	1	1	0	0	0	0	0	0	1	1	0	1	1	0	0	0	1	0	1	0	1	0	0	0	1	0	0	0	1	1	1	0	1	0
162	1	57	0	1.62	70	0	26.7	3	0	0	0	1	120	80	0	0	1	0	0	0	0	0	0	3	1	0	1	1	0	0	0	1	0	1	0	1	1	1	0	0	1	1	0	1	0	0	0	2	0
163	1	72	0	1.67	67.6	0	24.2	4	0	0	1	0	120	80	0	1	0	0	0	1	0	0	1	1	3	0	1	1	0	0	0	1	0	1	1	1	0	1	0	0	1	0	0	0	1	0	0	3	0
164	2	70	0	1.5	60	0	26.7	1	1	0	0	0	150	90	0	1	0	0	0	1	0	0	0	1	1	0	1	1	0	0	0	1	0	1	0	1	0	1	0	0	1	0	0	1	0	0	0	2	0
165	1	67	0	1.65	68.6	0	25.2	3	0	0	0	1	160	98	0	1	1	0	0	1	0	0	1	2	2	0	1	1	0	0	0	1	0	1	1	1	1	0	0	0	1	1	0	1	0	0	0	3	1
166	1	51	0	1.73	90	0	30.1	4	0	0	1	0	134	83	0	0	1	0	0	1	0	0	0	3	3	0	1	0	1	0	0	1	0	1	0	1	1	0	0	0	1	0	0	1	0	0	0	3	0
168	1	55	0	1.7	59.5	1	20.6	4	0	0	1	0	140	68	0	0	0	0	0	1	0	0	0	3	2	0	1	1	0	0	0	1	0	1	0	1	0	1	0	0	1	0	0	1	0	0	0	2	0
169	1	77	1	1.57	60.7	0	24.6	2	0	1	0	0	124	70	0	1	0	1	0	1	0	0	1	1	1	1	1	1	0	0	0	1	0	1	0	1	1	1	0	1	1	0	0	1	0	0	0	1	0
170	2	72	0	1.52	55	1	23.8	1	1	0	0	0	178	100	0	0	1	0	0	1	0	0	0	1	1	0	1	1	0	0	0	1	0	0	1	1	0	0	0	0	1	1	0	1	0	0	0	1	0
171	1	72	0	1.64	68.3	0	25.4	1	1	0	0	0	180	80	0	0	1	0	0	1	1	0	0	1	3	0	1	1	0	0	0	1	0	1	0	1	1	1	0	0	1	0	0	1	0	0	0	2	0
172	1	68	0	1.65	72.3	0	26.6	1	1	0	0	0	154	94	0	0	1	0	0	1	1	1	0	1	3	0	1	1	0	0	0	1	0	1	0	1	0	0	0	0	1	0	0	1	0	0	0	2	0
173	1	74	0	1.72	70	0	23.7	4	0	0	1	0	104	69	0	0	0	0	0	0	0	0	0	3	2	1	1	1	0	0	0	1	0	1	0	1	0	1	1	1	1	0	0	1	0	0	0	3	0
175	2	71	0	1.55	48	1	20	1	1	0	0	0	158	80	0	1	0	0	0	0	1	0	0	1	1	0	1	0	1	0	0	1	0	1	0	1	0	0	0	0	1	0	0	1	0	0	0	2	0
176	1	32	0	1.65	73	0	26.8	4	0	0	1	0	130	90	0	0	1	0	0	0	0	0	0	3	3	0	1	1	0	0	0	0	0	1	0	1	1	0	0	0	1	0	0	0	1	0	0	3	0
177	2	55	0	1.55	74	0	30.8	2	0	1	0	0	130	80	0	1	1	1	0	1	0	0	0	1	1	0	1	1	0	0	0	0	1	1	0	1	0	1	0	1	0	1	0	1	0	0	1	3	0
178	2	66	0	1.55	51	1	21.2	4	0	0	1	0	148	90	0	0	0	0	0	1	0	0	0	1	1	0	1	0	1	0	0	0	1	1	1	1	0	1	0	0	1	0	0	1	0	0	0	3	0
179	2	52	0	1.62	70	0	26.7	2	0	1	0	0	105	78	0	0	0	0	0	1	0	0	0	3	3	0	1	0	1	0	0	0	0	0	0	1	1	0	0	0	1	0	0	1	0	0	0	2	0
180	2	79	1	1.6	54	1	21.1	4	0	0	1	0	127	78	0	0	0	1	0	1	0	0	0	3	3	0	1	1	0	0	0	0	1	1	0	1	1	1	0	1	1	0	1	1	0	0	1	2	0
181	2	70	0	1.55	NA	NA	NA	4	0	0	1	0	105	62	0	1	1	1	0	1	0	0	0	1	1	0	1	1	0	0	0	1	0	1	0	1	1	0	0	1	1	0	0	1	0	0	0	2	0
182	1	69	0	1.73	80	0	26.7	4	0	0	1	0	124	82	0	0	0	1	0	1	0	0	0	3	3	0	1	1	0	0	0	1	0	1	1	1	0	0	0	0	1	0	0	0	1	0	0	3	0
183	1	66	0	1.69	73	0	25.6	1	1	0	0	0	122	86	0	1	0	0	0	1	0	0	0	2	2	0	1	1	0	0	0	1	0	1	0	0	0	0	0	0	1	0	0	1	0	0	0	3	0
184	1	67	0	1.6	51.5	1	20.1	1	1	0	0	0	116	62	0	0	0	0	0	0	0	0	0	3	3	1	1	1	0	0	0	0	0	0	0	1	0	0	0	0	0	0	0	1	0	0	0	3	0
185	1	74	0	1.69	74	0	25.9	1	1	0	0	0	144	76	0	0	1	0	0	1	0	0	0	1	1	0	1	0	1	0	0	0	0	1	1	1	0	0	0	0	0	0	0	1	0	0	0	3	0
186	1	71	0	1.62	60.6	0	23.1	4	0	0	1	0	131	62	0	1	0	0	0	0	0	0	0	3	3	0	1	1	0	0	0	1	0	1	0	1	0	0	0	0	1	0	0	1	0	0	0	3	0
187	1	66	0	1.63	54	1	20.3	4	0	0	1	0	90	64	0	0	0	0	1	1	0	0	1	3	3	1	1	1	0	0	0	1	0	0	0	1	0	0	0	1	1	0	1	1	0	0	0	3	0
188	1	55	0	1.74	64	0	21.1	4	0	0	1	0	116	74	0	0	1	0	0	0	0	0	0	3	3	0	1	0	1	0	0	1	0	1	0	1	1	0	0	0	1	1	0	1	0	0	0	1	0
189	2	55	0	1.5	55	1	24.4	2	0	1	0	0	198	113	0	0	0	0	0	1	0	0	0	1	3	0	1	1	0	0	0	1	0	1	0	1	1	1	0	0	1	1	1	1	0	0	0	3	0
190	1	58	0	1.65	90	0	33.1	2	0	1	0	0	140	90	0	0	1	0	0	1	0	0	0	3	3	0	1	1	0	0	0	0	1	1	1	1	1	1	0	0	1	1	0	0	1	0	0	3	0
191	2	58	0	1.55	90	0	37.5	1	1	0	0	0	112	80	0	1	0	0	0	1	1	0	0	1	1	0	1	1	0	0	0	1	0	1	0	1	0	1	0	0	1	0	0	1	0	0	0	2	0
193	1	68	0	1.7	62.5	0	21.6	1	1	0	0	0	169	85	0	1	0	1	0	1	0	0	0	3	1	0	1	1	0	0	0	1	0	1	1	1	0	0	0	1	1	0	0	1	0	0	0	1	0
194	1	65	0	1.7	71	0	24.6	4	0	0	1	0	132	60	0	1	1	0	0	1	0	0	0	3	3	0	1	0	1	0	0	1	0	1	0	1	1	0	0	0	1	1	1	1	0	0	0	3	0
195	2	61	0	1.5	58	1	25.8	4	0	0	1	0	150	100	0	1	1	1	0	1	0	0	0	1	1	0	1	1	0	0	0	1	0	1	0	1	1	1	0	0	1	1	0	1	0	0	0	4	1
196	1	46	0	1.78	85	0	26.8	4	0	0	1	0	150	102	0	0	1	0	0	1	0	0	0	1	3	0	1	1	0	0	0	1	0	1	1	0	1	0	0	0	1	0	1	1	0	0	0	3	0
197	1	68	0	1.62	47.4	1	18.1	1	1	0	0	0	145	75	0	0	0	0	0	1	0	0	0	3	2	0	1	1	0	0	0	1	0	0	1	1	1	1	0	1	1	0	0	1	0	0	0	3	0
198	1	81	1	1.65	70	0	25.7	4	0	0	1	0	140	80	0	1	1	0	0	1	0	0	0	1	1	0	1	0	1	0	0	1	0	0	0	1	1	0	0	0	1	0	1	1	0	0	1	4	1
199	1	54	0	1.72	75.6	0	25.6	1	1	0	0	0	160	84	0	1	0	0	0	1	0	0	0	2	3	0	1	1	0	0	0	1	0	1	1	1	0	0	0	0	1	0	0	1	0	0	0	3	0
200	2	46	0	1.48	52.4	1	23.9	3	0	0	0	1	140	85	1	0	0	0	0	0	0	0	0	1	1	0	1	1	0	0	0	1	0	1	0	1	0	1	0	0	1	0	0	1	0	0	0	1	0
201	1	65	0	1.65	67	0	24.6	3	0	0	0	1	136	70	1	0	0	0	0	1	1	0	0	1	2	0	1	1	0	0	0	0	1	0	1	1	0	0	0	0	1	0	0	1	0	0	0	3	0
202	1	66	0	1.72	70	0	23.7	4	0	0	1	0	100	80	0	0	1	0	0	0	0	0	0	3	3	1	1	0	1	0	0	0	0	0	0	1	1	0	0	0	1	0	0	0	1	0	0	3	0
203	1	45	0	1.65	62	0	22.8	4	0	0	1	0	140	90	0	1	0	0	0	0	0	0	0	1	3	0	1	1	0	0	0	1	0	1	0	1	1	1	0	0	1	0	1	1	0	0	0	2	0
204	1	55	0	1.7	77	0	26.6	4	0	0	1	0	170	110	0	1	1	0	0	0	0	0	0	3	3	0	1	1	0	0	0	1	0	1	0	1	1	1	0	0	1	0	0	1	0	0	0	3	0
205	1	87	1	1.6	50	1	19.5	2	0	1	0	0	120	80	0	1	0	0	0	1	0	0	1	3	3	0	1	0	1	0	0	1	0	1	1	1	0	1	0	0	1	0	0	1	0	0	0	2	0
206	2	60	0	1.5	52	1	23.1	1	1	0	0	0	125	62	0	1	0	0	0	0	0	0	0	1	3	0	1	1	0	0	0	0	0	1	0	1	0	1	0	0	0	0	0	0	1	0	0	2	0
207	2	68	0	1.55	55.6	1	23.1	1	1	0	0	0	140	70	0	1	1	0	0	1	0	0	1	1	1	0	1	1	0	0	0	0	1	1	0	1	0	0	0	0	0	1	0	1	0	0	0	3	0
209	1	64	0	1.7	71	0	24.6	1	1	0	0	0	140	84	0	0	0	0	0	1	0	0	0	3	2	0	1	1	0	0	0	1	0	1	0	1	0	1	0	0	1	0	0	1	0	0	0	3	0
210	1	61	0	1.78	75	0	23.7	1	1	0	0	0	144	82	0	1	1	0	0	1	0	0	0	2	3	0	1	1	0	0	0	1	0	1	1	1	0	1	0	0	0	1	0	1	0	0	0	3	0
211	2	71	0	1.55	60	0	25	1	1	0	0	0	126	78	0	1	1	0	0	1	0	0	0	1	1	1	1	1	0	0	0	1	0	1	1	1	0	0	0	0	1	0	0	1	0	0	0	1	0
213	1	61	0	1.65	70	0	25.7	3	0	0	0	1	150	80	0	1	0	0	0	1	0	0	1	1	3	0	1	1	0	0	0	0	1	1	1	1	0	0	0	0	0	0	0	1	0	0	0	3	0
214	1	61	0	1.7	73	0	25.3	1	1	0	0	0	151	80	0	1	0	0	0	1	0	0	0	3	3	0	1	1	0	0	0	0	0	1	1	1	0	1	0	0	0	0	0	1	0	0	0	3	0
215	1	77	1	1.74	71.9	0	23.7	3	0	0	0	1	138	82	0	0	1	0	0	0	1	0	0	2	2	0	1	1	0	0	0	1	0	1	0	1	0	1	0	0	0	0	0	1	0	0	0	2	0
216	1	63	0	1.66	65	0	23.6	5	0	0	0	1	123	82	0	0	1	1	0	0	0	0	0	2	2	0	1	1	0	0	0	1	0	1	0	1	0	1	0	1	0	1	0	1	0	0	0	3	0
217	1	67	0	1.68	75	0	26.6	3	0	0	0	1	142	74	1	1	1	0	0	1	0	0	0	1	3	1	1	1	0	0	0	1	0	1	1	1	1	0	0	0	1	0	0	1	0	0	0	2	0
218	1	78	1	1.67	61	0	21.9	1	1	0	0	0	160	90	1	1	1	1	0	1	1	0	1	1	1	1	1	1	0	0	0	0	0	1	1	1	1	1	1	1	1	0	1	0	1	0	0	3	0
219	2	73	0	1.5	52	1	23.1	4	0	0	1	0	180	100	0	1	0	1	0	1	0	0	0	3	3	0	1	1	0	0	0	1	0	1	0	1	1	1	0	0	1	0	0	0	1	0	0	2	0
220	1	66	0	1.71	75.8	0	25.9	2	0	1	0	0	124	76	0	1	0	0	0	1	0	0	1	3	2	0	1	1	0	0	0	1	0	1	0	1	0	1	0	0	1	0	0	1	0	0	0	3	0
221	2	71	0	1.56	60	0	24.7	1	1	0	0	0	140	80	0	0	0	0	0	0	0	0	0	1	1	0	1	1	0	0	0	1	0	1	0	1	0	0	0	0	1	0	0	1	0	0	0	1	0
222	1	72	0	1.62	98	0	37.3	1	1	0	0	0	165	88	0	0	0	0	0	1	0	0	0	2	2	1	1	1	0	0	0	1	0	1	1	1	0	1	0	0	1	0	0	1	0	0	0	2	0
225	1	73	0	NA	NA	NA	NA	4	0	0	1	0	134	74	0	0	0	0	0	0	0	0	0	2	2	0	1	0	1	0	0	1	0	1	0	1	1	0	0	0	1	0	0	0	1	0	0	4	1
226	1	82	1	1.65	NA	NA	NA	4	0	0	1	0	104	56	1	0	1	1	0	1	0	0	0	3	3	1	1	1	0	0	0	0	0	0	0	1	1	1	0	0	1	1	0	1	0	0	0	3	0
227	1	63	0	1.65	61.2	0	22.5	3	0	0	0	1	124	68	0	0	1	0	0	1	0	0	0	2	2	0	1	1	0	0	0	1	0	1	0	1	1	0	0	0	1	1	0	1	0	0	0	3	0
228	1	65	0	1.76	83	0	26.8	1	1	0	0	0	110	70	0	0	0	0	0	1	0	0	0	1	3	1	1	1	0	0	0	1	0	1	0	1	1	1	0	0	1	0	0	1	0	0	0	3	0
229	1	67	0	1.7	66	0	22.8	2	0	1	0	0	121	82	0	1	0	1	0	1	0	0	1	1	3	0	1	0	1	0	0	1	0	1	0	1	1	1	0	0	1	0	0	1	0	0	0	1	0
230	2	59	0	1.55	60	0	25	1	1	0	0	0	120	80	0	0	1	0	0	0	0	0	0	1	1	0	1	1	0	0	0	1	0	1	0	1	1	0	0	0	1	0	0	1	0	0	0	1	0
231	2	69	0	1.45	40.5	1	19.3	5	0	0	0	1	170	100	0	1	0	1	0	1	0	0	0	1	2	1	1	1	0	0	0	1	0	1	1	1	0	1	1	1	1	0	0	1	0	0	0	2	0
232	2	77	1	1.6	64	0	25	1	1	0	0	0	120	80	0	1	0	0	0	1	0	0	1	1	1	0	1	1	0	0	0	1	0	1	0	1	0	0	0	0	1	0	0	1	0	0	0	1	0
233	2	77	1	1.56	48	1	19.7	4	0	0	1	0	118	76	0	0	0	0	0	0	0	0	1	3	3	0	1	1	0	0	0	0	0	1	0	1	0	0	0	0	1	0	0	1	0	0	0	3	0
234	2	61	0	1.53	45	1	19.2	4	0	0	1	0	112	70	0	0	0	1	0	0	0	0	0	1	1	0	1	1	0	0	0	0	0	1	0	1	1	0	0	0	1	0	0	1	0	0	0	2	0
235	1	50	0	1.68	75	0	26.6	4	0	0	1	0	60	40	0	1	1	0	0	1	0	0	0	1	1	1	1	1	0	0	0	0	0	1	0	1	1	0	0	0	1	0	0	1	0	0	0	2	0
237	1	53	0	1.7	75	0	26	4	0	0	1	0	119	62	0	1	0	0	0	0	0	0	0	1	1	0	1	1	0	0	0	1	0	1	0	1	1	1	0	0	1	0	0	1	0	0	0	3	0
239	1	68	0	1.69	55	1	19.3	4	0	0	1	0	102	61	0	0	1	1	0	0	0	0	0	3	3	1	1	0	1	0	0	1	0	1	0	1	1	0	0	0	1	0	0	1	0	0	0	3	0
240	1	54	0	1.6	60	0	23.4	4	0	0	1	0	118	70	0	0	0	0	0	0	0	0	0	3	3	0	1	1	0	0	0	0	0	1	0	1	1	0	0	0	1	0	0	1	0	0	0	4	1
241	2	63	0	1.5	46	1	20.4	4	0	0	1	0	117	73	0	0	1	1	0	0	0	0	0	1	1	1	1	1	0	0	0	0	0	1	0	1	0	0	0	1	1	1	0	1	0	0	0	3	0
242	1	53	0	1.73	60	0	20	5	0	0	0	1	135	90	0	0	0	0	0	0	0	0	0	3	1	0	1	0	1	0	0	1	0	1	0	1	1	1	0	0	0	0	0	1	0	0	0	4	1
243	1	59	0	1.68	70	0	24.8	4	0	0	1	0	149	84	0	1	1	0	0	0	0	0	0	3	3	0	1	1	0	0	0	0	0	1	0	1	1	0	0	0	1	1	0	1	0	0	0	2	0
245	1	72	0	1.56	55	1	22.6	4	0	0	1	0	123	78	0	1	0	0	0	0	0	0	0	3	3	0	1	1	0	0	0	1	0	1	0	1	1	1	0	0	1	0	0	0	1	0	0	3	0
246	1	65	0	1.66	69	0	25	2	0	1	0	0	142	84	0	0	1	0	0	0	0	0	0	3	3	0	1	1	0	0	0	1	0	0	0	1	0	1	0	0	1	0	0	1	0	0	0	3	0
247	2	68	0	1.56	64	0	26.3	1	1	0	0	0	160	100	0	1	0	0	0	1	0	0	0	1	1	NA	1	1	0	0	0	1	0	1	1	1	0	1	0	0	1	0	0	0	1	0	0	3	0
248	2	63	0	1.52	NA	NA	NA	2	0	1	0	0	208	106	0	1	1	0	0	1	1	0	1	1	1	1	1	0	1	0	0	1	0	1	1	1	1	1	0	0	1	1	0	1	0	0	0	3	0
249	1	52	0	1.65	70	0	25.7	2	0	1	0	0	120	80	0	1	1	0	0	0	0	0	0	3	3	0	1	1	0	0	0	0	0	1	0	1	1	0	0	0	1	0	0	1	0	0	0	1	0
250	1	58	0	1.66	77	0	27.9	2	0	1	0	0	142	90	0	1	1	0	0	1	0	0	0	1	1	0	1	1	0	0	0	1	0	1	0	0	1	1	0	0	1	1	0	1	0	0	0	3	0
252	2	67	0	1.5	50	1	22.2	1	1	0	0	0	128	60	0	1	0	0	0	0	0	0	0	1	1	0	1	1	0	0	0	0	1	0	0	1	0	1	0	0	0	1	0	1	0	0	0	2	0
253	2	66	0	1.5	55	1	24.4	2	0	1	0	0	140	71	0	1	1	0	0	1	0	0	0	1	3	0	1	0	1	0	0	1	0	1	1	1	0	1	0	0	1	0	0	1	0	0	0	3	0
254	1	73	0	1.65	65	0	23.9	2	0	1	0	0	119	99	0	0	0	1	0	0	1	0	1	1	2	1	1	1	0	0	0	0	0	0	0	1	1	1	1	1	1	0	0	1	0	0	0	3	0
255	2	48	0	1.58	69.5	0	27.8	3	0	0	0	1	100	85	0	1	1	0	0	1	0	0	0	1	1	0	1	1	0	0	0	1	0	1	0	1	0	0	0	0	1	1	0	1	0	0	0	2	0
256	1	73	0	1.75	78.2	0	25.5	4	0	0	1	0	164	102	0	1	1	0	0	1	0	0	0	1	1	0	1	1	0	0	0	1	0	1	1	1	0	1	0	0	1	1	0	1	0	0	0	1	0
257	1	74	0	1.54	44	1	18.6	4	0	0	1	0	99	51	0	1	0	0	0	0	0	0	1	3	3	0	1	1	0	0	0	0	0	0	0	1	1	0	0	0	1	0	0	1	0	0	0	2	0
258	2	60	0	1.55	50	1	20.8	3	0	0	0	1	120	80	0	1	1	0	0	1	1	0	0	1	1	0	1	1	0	0	0	0	1	0	0	1	1	1	0	0	1	1	0	1	0	0	0	3	1
259	1	36	0	1.58	60	0	24	4	0	0	1	0	130	74	0	0	1	1	0	0	0	0	0	3	1	0	1	0	1	0	0	0	0	1	0	1	1	0	0	0	1	0	0	1	0	0	0	3	0
260	1	65	0	1.7	51.8	1	17.9	4	0	0	1	0	110	60	0	0	1	0	0	0	0	0	0	3	3	0	1	1	0	0	0	0	0	1	0	1	0	0	0	0	1	0	0	1	0	0	0	1	0
261	1	75	1	1.62	65	0	24.8	1	1	0	0	0	140	70	0	1	0	0	0	1	0	0	1	3	1	0	1	1	0	0	0	0	1	1	0	1	0	0	0	0	1	0	0	1	0	0	0	1	0
264	2	63	0	1.56	49	1	20.1	5	0	0	0	1	144	84	0	1	0	1	0	1	0	0	0	1	1	1	1	0	1	0	0	1	0	0	1	1	0	1	0	1	0	0	0	1	0	0	0	3	0
265	2	68	0	1.64	68	0	25.3	3	0	0	0	1	132	80	0	1	1	0	0	1	0	0	0	1	1	0	1	1	0	0	0	1	0	1	0	1	0	0	0	0	0	0	0	1	0	0	0	3	0
266	1	67	0	1.6	60	0	23.4	4	0	0	1	0	82	54	0	1	0	0	0	0	0	0	0	1	3	1	1	1	0	0	0	0	0	0	0	1	1	0	0	0	1	0	0	1	0	0	0	3	0
267	1	67	0	1.6	62	0	24.2	3	0	0	0	1	100	65	0	1	1	1	0	0	0	0	0	1	2	0	1	1	0	0	0	0	0	0	0	1	0	0	0	0	0	1	0	1	0	0	0	4	1
268	1	64	0	1.65	59.5	1	21.9	4	0	0	1	0	100	60	0	0	1	0	0	0	1	0	0	2	2	0	1	1	0	0	0	0	0	1	0	1	0	0	0	0	1	0	0	1	0	0	0	1	0
269	2	64	0	1.55	58.5	1	24.3	3	0	0	0	1	166	78	0	1	1	0	0	1	0	0	0	1	1	0	1	1	0	0	0	1	0	1	1	1	0	0	0	0	1	1	0	1	0	0	0	3	0
270	1	49	0	1.65	55	1	20.2	4	0	0	1	0	138	83	0	1	1	0	0	0	0	0	0	3	3	0	1	0	1	0	0	0	0	1	0	1	1	0	0	0	1	0	0	1	0	0	0	3	0
271	1	63	0	1.58	40	1	16	4	0	0	1	0	200	102	1	1	0	1	0	1	0	0	0	3	3	1	1	0	1	0	1	0	1	1	1	1	1	1	1	1	1	0	0	1	0	0	0	2	0
272	2	77	1	1.5	49	1	21.8	1	1	0	0	0	140	70	0	1	1	0	0	1	1	0	0	1	1	0	1	1	0	0	0	1	0	0	0	1	0	1	0	0	1	0	0	1	0	0	0	2	0
273	1	58	0	1.7	75	0	26	4	0	0	1	0	155	86	0	0	1	0	0	1	0	0	0	3	3	0	1	0	1	0	0	0	1	1	1	1	1	0	0	0	1	0	0	1	0	0	0	3	0
275	1	50	0	1.65	70	0	25.7	4	0	0	1	0	126	70	0	1	0	0	0	1	0	0	1	1	2	0	1	1	0	0	0	1	0	1	0	1	0	0	0	0	1	0	0	1	0	0	0	2	0
276	2	49	0	1.68	59	1	20.9	2	0	1	0	0	90	60	0	1	1	0	0	1	0	0	0	1	1	0	1	0	1	0	0	0	0	1	0	1	0	0	0	0	1	0	0	1	0	0	0	2	0
277	1	59	0	1.66	79.5	0	28.9	3	0	0	0	1	132	70	0	1	0	0	0	1	0	0	0	1	1	0	1	1	0	0	0	0	1	1	1	1	0	0	0	0	1	0	0	1	0	0	0	3	0
278	1	33	0	1.56	70	0	28.8	2	0	1	0	0	100	52	0	1	0	0	0	0	0	0	0	3	3	0	1	1	0	0	0	1	0	1	0	1	0	0	0	0	0	0	0	1	0	0	0	2	0
279	1	62	0	1.64	68	0	25.3	1	1	0	0	0	126	72	0	0	1	0	0	0	0	0	0	1	3	0	1	1	0	0	0	1	0	1	0	1	0	1	0	0	1	0	0	1	0	0	0	3	0
280	1	48	0	1.69	72.9	0	25.5	4	0	0	1	0	118	70	0	0	1	0	0	1	1	0	0	1	2	0	1	0	1	0	0	1	0	1	0	1	0	0	0	0	0	0	0	1	0	0	0	2	0
281	1	73	0	1.65	61.5	0	22.6	4	0	0	1	0	100	60	0	1	1	1	0	1	0	0	0	1	1	1	1	0	1	0	0	0	1	1	0	1	1	0	0	1	1	0	0	1	0	0	0	2	1
282	1	72	0	1.58	57	1	22.8	1	1	0	0	0	155	92	0	0	1	0	0	1	0	0	0	1	2	0	1	1	0	0	0	0	1	1	0	1	0	0	0	0	1	0	0	1	0	0	0	1	0
283	2	68	0	1.64	64.1	0	23.8	5	0	0	0	1	143	73	0	1	1	0	0	1	0	0	0	1	1	0	1	1	0	0	0	0	1	0	1	1	1	0	0	0	0	1	0	1	1	1	0	2	0
285	1	49	0	1.66	60	0	21.8	4	0	0	1	0	174	123	0	0	0	0	0	1	0	0	0	3	3	NA	1	1	0	0	0	1	0	1	1	1	1	0	0	0	1	0	0	1	0	0	0	3	0
286	1	50	0	1.74	59	1	19.5	4	0	0	1	0	166	80	1	0	0	1	0	1	0	0	0	3	3	1	1	1	0	0	0	0	1	0	1	1	1	1	0	0	1	0	0	1	0	0	0	2	0
288	1	57	0	1.68	56	1	19.8	4	0	0	1	0	154	80	0	1	0	1	0	1	0	0	0	3	3	0	1	1	0	0	0	1	0	1	1	1	1	1	0	0	1	0	0	1	0	0	0	2	0
289	1	65	0	1.7	74	0	25.6	4	0	0	1	0	160	90	0	1	1	0	0	1	0	0	0	3	3	0	1	1	0	0	0	1	0	1	1	1	0	1	0	0	0	1	0	1	0	0	0	3	0
290	1	76	1	1.76	70	0	22.6	4	0	0	1	0	135	72	0	1	1	0	0	0	0	0	0	1	1	0	1	0	1	0	0	1	0	1	0	1	1	1	0	0	1	0	0	1	0	0	0	3	0
291	1	81	1	1.7	62	0	21.5	4	0	0	1	0	135	72	1	0	0	0	0	1	0	0	0	3	2	1	1	0	1	0	0	1	0	1	0	1	1	1	0	0	1	0	0	1	0	0	0	4	1
292	1	66	0	1.61	60	0	23.1	4	0	0	1	0	100	60	0	1	0	0	0	0	0	0	0	3	3	1	1	0	1	0	0	0	0	1	0	1	0	1	0	0	1	0	0	1	0	0	0	3	0
293	1	57	0	1.64	71	0	26.4	4	0	0	1	0	148	90	0	0	0	0	0	1	0	0	0	3	3	0	1	0	1	0	0	1	0	1	0	1	1	0	0	0	1	0	0	1	0	0	0	2	0
295	1	64	0	1.75	95	0	31	3	0	0	0	1	142	90	0	0	1	0	0	1	1	0	0	3	3	0	1	0	1	0	0	0	0	1	1	1	1	0	0	0	0	1	0	1	0	0	0	3	0
296	2	73	0	NA	NA	NA	NA	4	0	0	1	0	90	63	1	0	0	1	0	1	0	0	0	1	1	1	1	0	1	0	0	1	0	1	0	1	1	0	1	1	1	0	1	1	0	0	1	3	0
297	2	65	0	1.55	53	1	22.1	2	0	1	0	0	150	80	0	0	1	0	0	1	0	0	0	1	1	0	1	0	1	0	0	0	1	1	1	1	0	1	0	0	1	1	0	1	0	0	0	2	0
298	1	59	0	1.6	63	0	24.6	1	1	0	0	0	150	112	0	1	0	0	0	1	0	0	0	3	3	0	1	1	0	0	0	1	0	0	1	1	0	1	0	0	0	0	0	1	0	0	0	2	0
299	1	76	1	1.65	75	0	27.5	1	1	0	0	0	160	100	0	1	1	1	0	1	0	0	0	2	2	1	1	1	0	0	0	0	1	1	1	1	1	1	0	0	1	0	0	1	0	0	0	4	1
300	1	53	0	1.6	60	0	23.4	4	0	0	1	0	121	74	0	1	0	0	0	0	0	0	0	3	3	0	1	0	1	0	0	1	0	1	0	1	1	0	0	0	1	0	0	1	0	0	0	2	0
301	2	78	1	1.55	50	1	20.8	1	1	0	0	0	120	70	0	1	1	0	0	1	0	0	0	1	1	0	1	1	0	0	0	0	0	1	1	1	0	1	0	0	1	1	0	1	0	0	0	2	0
302	1	56	0	1.65	58	1	21.3	4	0	0	1	0	134	81	0	0	0	0	0	0	0	0	0	3	3	0	1	0	1	0	0	1	0	1	0	1	1	0	0	0	1	0	0	1	0	0	0	1	0
303	1	39	0	1.68	80	0	28.3	4	0	0	1	0	145	84	0	1	0	0	0	1	0	0	0	3	3	0	1	0	1	0	0	1	0	1	1	1	0	1	0	1	1	0	0	1	0	0	0	3	0
304	1	50	0	1.65	81	0	29.8	1	1	0	0	0	138	88	0	1	0	0	0	0	0	0	0	3	1	0	1	1	0	0	0	1	0	1	0	1	1	0	0	1	0	0	0	1	0	0	0	1	0
305	1	47	0	1.7	74	0	25.6	2	0	1	0	0	110	70	0	1	1	0	0	0	0	0	0	3	2	0	1	1	0	0	0	1	0	1	0	1	0	1	0	0	1	0	0	1	0	0	0	3	0
306	1	75	1	1.57	65.7	0	26.7	4	0	0	1	0	160	110	0	0	0	1	0	1	0	0	0	1	1	0	1	1	0	0	0	1	0	0	0	1	0	1	0	0	1	0	0	1	0	0	0	2	0
307	1	59	0	1.7	71.5	0	24.7	1	1	0	0	0	160	100	0	1	0	0	0	1	1	0	0	2	2	1	1	1	0	0	0	1	0	1	0	1	0	1	0	0	0	0	0	1	0	0	0	2	0
308	1	72	0	1.65	62	0	22.8	1	1	0	0	0	163	88	1	0	1	0	0	1	0	0	0	3	3	1	1	1	0	0	0	1	0	1	1	1	0	1	0	0	0	0	1	0	1	0	0	3	0
309	1	63	0	1.55	63	0	26.2	3	0	0	0	1	146	85	0	1	0	0	0	1	0	0	0	3	3	0	1	1	0	0	0	1	0	0	0	1	0	0	0	0	1	0	0	1	1	1	0	3	0
310	2	68	0	1.6	58	1	22.7	3	0	0	0	1	142	72	0	0	1	0	0	1	0	0	0	1	1	0	1	1	0	0	0	1	0	1	1	1	1	1	0	0	1	0	0	1	0	0	0	4	1
311	1	82	1	1.65	60	0	22	4	0	0	1	0	134	65	0	0	1	0	0	1	0	0	0	3	3	0	1	0	1	0	0	1	0	0	1	1	1	0	0	0	1	0	0	1	1	1	0	4	1
312	2	69	0	1.5	52	1	23.1	4	0	0	1	0	120	70	0	1	1	0	0	1	0	0	0	1	1	0	1	1	0	0	0	1	0	1	0	1	0	1	0	0	1	1	0	1	1	1	0	3	0
314	2	52	0	1.55	48	1	20	1	1	0	0	0	100	70	0	0	0	0	0	0	0	0	0	1	1	0	1	1	0	0	0	1	0	1	0	1	0	1	0	0	0	0	0	1	0	0	0	3	0
315	1	75	1	1.7	70	0	24.2	1	1	0	0	0	196	100	0	0	0	1	0	1	1	0	0	3	3	0	1	1	0	0	0	1	0	0	1	1	0	1	0	0	1	0	0	1	0	0	0	3	0
316	1	63	0	1.62	64.5	0	24.6	1	1	0	0	0	118	70	0	0	1	0	0	1	0	0	0	3	2	0	1	1	0	0	0	1	0	1	1	1	1	1	0	0	1	1	0	1	1	1	0	4	1
317	1	75	1	1.7	NA	NA	NA	1	1	0	0	0	117	71	1	0	1	1	0	1	0	0	0	1	1	1	1	1	0	0	0	1	0	1	0	1	1	1	1	0	1	0	1	1	0	0	0	3	0
318	1	49	0	1.7	89	0	30.8	2	0	1	0	0	174	108	0	0	0	0	0	1	0	0	0	1	1	0	1	1	0	0	0	1	0	1	1	1	0	1	0	0	0	0	0	1	0	0	0	3	0
319	1	59	0	1.68	60	0	21.3	4	0	0	1	0	102	62	0	0	0	0	0	1	0	0	0	2	3	0	1	1	0	0	0	0	0	1	0	1	0	1	0	0	1	0	0	1	0	0	0	3	0
321	1	66	0	1.7	84.2	0	29.1	2	0	1	0	0	158	92	1	0	1	0	0	1	0	0	0	2	3	1	1	1	0	0	0	1	0	1	1	1	0	1	0	0	1	0	0	1	1	1	0	2	0
322	1	79	1	1.6	52.5	1	20.5	4	0	0	1	0	140	80	1	0	0	0	0	1	1	0	0	1	2	1	1	1	0	0	0	0	1	1	0	1	0	1	0	0	1	0	0	1	0	0	0	3	0
324	1	64	0	1.82	65	0	19.6	1	1	0	0	0	160	96	0	1	1	0	0	1	0	0	1	1	3	0	1	0	1	0	0	1	0	1	0	1	0	1	0	0	0	0	0	1	0	0	0	2	0
325	2	58	0	1.63	69.5	0	26.2	1	1	0	0	0	138	80	0	1	0	1	0	1	0	0	0	1	1	NA	1	1	0	0	0	0	1	1	1	1	0	0	1	0	0	0	0	1	0	0	0	2	0
326	2	67	0	1.55	60	0	25	4	0	0	1	0	149	81	0	0	0	0	0	1	0	0	0	1	1	0	1	0	1	0	0	1	0	1	0	1	0	1	0	0	1	0	0	1	0	0	0	2	0
327	1	52	0	1.65	77.5	0	28.5	2	0	1	0	0	144	88	0	0	0	0	0	1	0	0	0	1	1	0	1	0	1	0	1	0	1	1	1	1	1	1	0	0	1	0	0	1	0	0	0	2	0
329	1	67	0	1.75	63	0	20.6	1	1	0	0	0	130	93	0	0	1	0	0	1	0	0	0	3	2	0	1	1	0	0	0	1	0	1	1	1	0	0	0	0	1	0	0	1	0	0	0	3	0
330	1	69	0	1.6	59	1	23	4	0	0	1	0	134	78	0	1	1	1	0	1	0	0	1	1	2	0	1	1	0	0	0	1	0	1	0	1	0	0	0	1	1	0	1	1	0	0	0	4	1
331	2	57	0	1.6	54	1	21.1	4	0	0	1	0	90	61	0	0	0	1	0	0	0	0	0	1	1	0	1	0	1	0	0	0	0	1	0	1	1	0	0	0	1	0	0	1	0	0	0	3	1
332	1	66	0	1.56	54.6	1	22.4	1	1	0	0	0	140	85	0	0	1	0	0	1	0	0	0	3	3	1	1	1	0	0	0	1	0	1	0	1	0	1	0	0	1	1	0	0	1	0	0	4	0
333	2	73	0	1.5	40.5	1	18	2	0	1	0	0	148	69	0	1	1	1	0	1	0	0	1	1	1	1	1	1	0	0	0	1	0	1	0	1	1	1	1	1	1	1	1	1	0	0	0	3	0
334	2	61	0	1.65	70	0	25.7	1	1	0	0	0	150	80	0	0	1	0	0	1	0	0	0	1	1	0	1	1	0	0	0	1	0	0	1	1	0	1	0	0	0	0	0	1	0	0	0	2	0
335	1	50	0	1.72	80	0	27	1	1	0	0	0	160	100	0	1	1	0	0	1	0	0	0	3	3	0	1	1	0	0	0	1	0	1	0	1	0	1	0	0	0	1	0	1	0	0	0	3	0
336	1	48	0	1.7	74.5	0	25.8	1	1	0	0	0	120	80	0	0	1	0	0	0	0	0	0	3	3	0	1	1	0	0	0	0	0	0	0	1	0	0	0	0	0	0	0	1	0	0	0	3	0
340	1	44	0	1.77	86	0	27.5	4	0	0	1	0	113	71	0	0	1	0	0	1	0	0	0	3	3	0	1	0	1	0	0	1	0	1	1	1	1	1	0	0	1	1	0	1	0	0	0	3	0
342	1	72	0	1.72	80	0	27	4	0	0	1	0	148	78	0	0	0	1	0	1	0	0	0	1	3	1	1	1	0	0	0	1	0	1	0	1	1	1	0	1	1	0	0	1	0	0	1	3	0
343	2	74	0	1.58	55	1	22	1	1	0	0	0	154	68	1	0	0	0	0	1	0	0	0	1	1	0	1	1	0	0	0	0	1	1	0	1	0	1	0	0	1	1	0	1	0	0	0	2	0
345	1	66	0	1.58	64	0	25.6	1	1	0	0	0	118	62	0	0	0	0	0	1	0	0	0	1	3	NA	1	1	0	0	0	1	0	1	0	1	0	0	0	0	1	0	0	0	1	0	0	3	0
346	1	61	0	1.65	62	0	22.8	4	0	0	1	0	193	117	1	1	0	0	0	1	0	0	1	2	3	0	1	1	0	0	0	1	0	1	0	1	0	1	0	0	1	0	1	0	1	0	0	3	0
347	1	63	0	1.63	77.5	0	29.2	1	1	0	0	0	182	94	0	0	1	0	0	1	0	0	0	1	2	0	1	1	0	0	0	1	0	1	1	1	0	0	0	0	1	1	0	1	0	0	0	3	0
349	2	65	0	1.58	62	0	24.8	2	0	1	0	0	158	88	0	1	0	0	0	1	0	0	0	1	1	0	1	1	0	0	0	1	0	1	0	1	0	1	0	0	1	0	0	1	0	0	0	3	0
350	1	60	0	1.71	80	0	27.4	2	0	1	0	0	120	70	0	1	1	0	0	0	0	0	0	1	3	0	1	1	0	0	0	1	0	1	0	1	0	0	0	0	1	1	0	1	0	0	0	2	0
351	1	51	0	1.7	110	0	38.1	2	0	1	0	0	120	88	0	0	1	0	0	1	0	0	0	3	3	0	1	0	1	0	0	1	0	0	0	1	0	1	0	0	1	0	0	1	0	0	0	3	0
352	1	53	0	1.77	85	0	27.1	4	0	0	1	0	110	70	0	0	0	0	0	1	1	0	0	1	3	0	1	1	0	0	0	0	1	1	1	1	1	0	0	0	1	0	0	1	0	0	0	3	0
353	1	73	0	1.68	67	0	23.7	1	1	0	0	0	150	80	0	0	1	0	0	1	0	0	0	3	2	0	1	1	0	0	0	0	1	1	1	1	0	0	0	0	1	0	0	0	1	0	0	1	0
354	1	63	0	1.63	59.5	1	22.4	1	1	0	0	0	142	95	0	0	0	0	0	1	0	0	0	3	3	0	1	1	0	0	0	1	0	1	0	1	0	1	0	0	1	0	0	1	0	0	0	3	0
355	1	49	0	1.58	59	1	23.6	1	1	0	0	0	125	85	1	0	1	0	0	0	0	0	0	1	1	1	1	1	0	0	0	1	0	1	0	1	0	1	0	0	0	0	0	1	0	0	0	2	0
356	2	58	0	1.56	63	0	25.9	3	0	0	0	1	120	70	0	1	1	0	0	0	0	0	0	1	1	0	1	1	0	0	0	0	0	1	0	1	0	1	0	0	0	1	0	1	0	0	0	1	0
357	1	73	0	1.7	66	0	22.8	1	1	0	0	0	136	78	0	1	1	0	0	0	0	0	0	3	3	0	1	1	0	0	0	0	0	0	0	1	0	0	0	0	1	0	0	1	0	0	0	1	0
358	1	48	0	1.6	67	0	26.2	2	0	1	0	0	134	72	0	0	1	0	0	1	0	0	0	3	3	0	1	0	1	0	0	1	0	1	0	1	1	0	0	0	1	0	0	1	0	0	0	2	0
359	1	57	0	1.69	67	0	23.5	1	1	0	0	0	130	90	0	1	0	0	0	1	0	1	1	1	1	0	1	1	0	0	0	1	0	1	0	1	0	1	0	0	1	0	0	1	0	0	0	3	0
360	2	50	0	1.6	55	1	21.5	1	1	0	0	0	142	90	0	0	1	0	0	1	0	0	0	1	1	0	1	1	0	0	0	0	0	1	1	1	0	0	0	0	1	1	0	1	0	0	0	2	0
361	2	65	0	1.48	41.5	1	18.9	1	1	0	0	0	118	66	0	0	0	0	0	0	0	0	0	1	1	0	1	1	0	0	0	0	0	1	0	1	0	0	0	0	1	0	0	1	0	0	0	4	1
362	2	65	0	1.49	47.5	1	21.4	1	1	0	0	0	127	78	0	0	0	0	0	0	0	0	0	1	1	0	1	1	0	0	0	1	0	1	0	1	0	1	0	0	1	0	0	0	1	0	0	1	0
363	1	69	0	1.68	70	0	24.8	4	0	0	1	0	102	68	0	0	1	0	0	0	0	0	0	3	1	0	1	1	0	0	0	0	0	1	0	1	1	1	0	0	1	0	0	1	0	0	0	3	0
364	1	53	0	1.62	67	0	25.5	1	1	0	0	0	132	78	0	1	1	0	0	0	0	0	1	2	3	0	1	1	0	0	0	1	0	0	0	1	1	1	0	0	1	0	0	1	0	0	0	1	0
365	2	71	0	1.45	56	1	26.6	1	1	0	0	0	120	80	0	0	0	0	0	1	0	0	0	1	1	0	1	1	0	1	0	1	0	1	0	1	0	1	0	0	1	0	1	1	0	0	0	2	0
366	1	72	0	1.6	61.5	0	24	4	0	0	1	0	94	63	0	1	0	0	0	0	0	0	0	3	3	1	1	0	1	0	0	1	0	1	0	1	0	0	0	0	1	0	0	1	0	0	0	3	0
367	1	69	0	1.7	75.5	0	26.1	1	1	0	0	0	137	70	0	0	0	0	0	1	0	0	0	2	3	1	1	0	1	0	0	1	0	1	0	1	0	0	0	0	1	0	0	0	1	0	0	3	0
369	1	64	0	1.71	65	0	22.2	4	0	0	1	0	100	50	0	0	0	0	0	1	0	0	0	1	3	0	1	1	0	0	0	0	0	0	0	1	1	1	0	0	1	0	0	1	0	0	0	3	0
370	2	69	0	1.6	65	0	25.4	1	1	0	0	0	144	84	0	0	0	0	0	1	0	0	0	1	1	0	1	1	0	0	0	0	1	0	1	1	0	0	0	1	1	0	0	1	0	0	0	2	0
371	1	49	0	1.75	82	0	26.8	4	0	0	1	0	120	80	0	0	1	0	0	0	0	0	0	3	3	0	1	1	0	0	0	1	0	1	0	1	1	0	0	0	1	1	0	1	0	0	0	1	0
372	2	53	0	1.68	71	0	25.2	5	0	0	0	1	160	90	0	1	1	0	0	1	0	0	1	1	1	0	1	1	0	0	0	1	0	1	1	1	1	1	0	1	1	1	0	1	0	0	0	4	1
373	2	52	0	1.61	64	0	24.7	1	1	0	0	0	144	86	0	0	0	0	0	1	0	0	0	1	1	0	1	1	0	0	0	0	1	1	0	1	0	1	0	0	1	0	0	1	0	0	0	3	0
374	1	63	0	1.67	59	1	21.2	3	0	0	0	1	138	82	0	1	0	0	0	1	1	0	0	2	2	0	1	1	0	0	0	1	0	1	0	1	0	0	0	0	0	0	0	1	0	0	0	3	0
375	1	61	0	1.65	75.5	0	27.7	1	1	0	0	0	130	72	0	0	1	0	0	1	0	0	0	3	2	1	1	1	0	0	0	1	0	1	0	1	0	0	0	0	0	0	0	1	0	0	0	3	0
376	2	62	0	1.48	56	1	25.6	1	1	0	0	0	128	76	0	0	1	0	0	1	0	0	0	1	1	0	1	1	0	0	0	1	0	1	1	1	0	1	0	0	1	1	0	1	0	0	0	3	0
377	1	61	0	1.7	61.9	0	21.4	4	0	0	1	0	96	57	0	0	0	0	0	0	0	0	0	3	3	0	1	0	1	0	0	0	0	1	0	1	1	0	0	0	1	0	0	1	0	0	0	4	1
378	1	76	1	1.63	79.2	0	29.8	1	1	0	0	0	140	75	0	0	1	0	0	1	1	0	0	1	3	0	1	1	0	0	0	1	0	0	1	1	0	0	0	0	1	1	0	1	0	0	0	2	0
380	1	35	0	1.8	85	0	26.2	2	0	1	0	0	125	80	0	0	0	0	0	1	0	0	0	3	3	0	1	1	0	0	0	1	0	1	0	1	1	1	0	0	1	0	0	1	0	0	0	2	0
381	1	65	0	1.67	60.2	0	21.6	1	1	0	0	0	110	60	0	0	0	0	0	0	0	0	0	3	3	1	1	1	0	0	0	0	0	0	0	1	1	1	0	0	0	0	0	1	1	1	0	2	0
382	1	55	0	1.7	75.8	0	26.2	3	0	0	0	1	120	80	0	0	1	0	0	1	0	0	0	1	3	0	1	1	0	0	0	1	0	1	1	1	0	0	0	0	0	0	0	1	0	0	0	3	0
383	2	77	1	1.55	47	1	19.6	1	1	0	0	0	162	78	0	1	0	0	0	1	0	0	0	1	1	0	1	1	0	0	0	0	1	1	0	1	0	1	0	0	0	0	0	1	0	0	0	2	0
384	1	59	0	1.7	92	0	31.8	1	1	0	0	0	135	89	0	1	1	0	0	1	0	0	0	1	1	0	1	1	0	0	0	0	1	1	1	1	0	0	0	0	0	0	0	1	0	0	0	1	0
385	2	78	1	1.58	45	1	18	1	1	0	0	0	140	70	0	1	0	0	0	1	1	0	0	1	1	0	1	1	0	0	0	0	1	0	1	1	0	0	0	0	0	0	0	1	1	1	0	2	0
386	2	55	0	1.56	58.7	1	24.1	3	0	0	0	1	200	102	0	0	1	0	0	1	0	0	0	1	1	0	1	1	0	0	0	1	0	1	1	1	0	0	0	0	0	1	0	1	0	0	0	3	0
387	1	56	0	1.62	68	0	25.9	1	1	0	0	0	130	80	0	1	1	0	0	0	0	0	0	1	2	0	1	0	1	0	0	1	0	1	0	1	0	0	0	0	1	1	0	1	0	0	0	3	0
388	1	68	0	1.63	61.3	0	23.1	1	1	0	0	0	140	86	0	0	0	0	0	1	1	0	0	3	2	0	1	1	0	0	0	1	0	1	0	1	1	1	0	0	1	0	0	1	0	0	0	3	0
389	2	54	0	1.56	64	0	26.3	4	0	0	1	0	173	82	0	0	0	0	0	1	0	0	0	1	1	0	1	1	0	0	0	1	0	1	1	1	1	0	0	0	1	0	0	1	0	0	0	3	0
390	1	42	0	1.68	72.5	0	25.7	1	1	0	0	0	140	90	0	0	1	0	0	1	0	0	0	1	1	0	1	1	0	0	0	1	0	1	0	1	0	0	0	0	1	0	0	1	0	0	0	2	0
391	2	68	0	1.6	61	0	23.8	1	1	0	0	0	120	80	0	0	0	0	0	0	0	0	0	1	1	0	1	1	0	0	0	1	0	0	0	1	1	0	0	0	1	0	0	1	0	0	0	1	0
392	1	66	0	1.68	58.8	1	20.8	5	0	0	0	1	134	78	0	1	0	1	0	1	1	0	1	3	3	0	1	1	0	0	0	1	0	1	0	1	0	1	0	1	1	0	0	1	0	0	0	2	0
393	1	68	0	1.64	53	1	19.7	4	0	0	1	0	110	66	0	1	1	1	0	1	0	0	0	3	2	0	1	1	0	0	0	0	0	1	0	1	1	1	0	1	1	0	0	1	0	0	0	3	0
394	1	49	0	1.8	76.9	0	23.7	1	1	0	0	0	116	73	0	1	0	0	0	0	1	0	0	3	3	0	1	1	0	0	0	1	0	0	0	1	0	1	0	0	1	0	0	1	0	0	0	3	0
395	1	68	0	1.58	50.1	1	20.1	1	1	0	0	0	130	74	0	1	1	0	0	1	0	0	0	3	2	0	1	1	0	0	0	1	0	0	1	1	1	1	0	0	1	1	0	1	0	0	0	2	0
396	1	60	0	1.58	49	1	19.6	4	0	0	1	0	83	54	0	0	0	0	1	0	0	0	0	3	3	0	1	1	0	0	0	1	0	0	0	1	1	0	0	0	1	0	0	1	0	0	0	2	0
397	1	82	1	1.65	55	1	20.2	1	1	0	0	0	141	75	0	0	1	0	0	1	0	0	0	3	2	1	1	0	1	0	0	0	1	1	1	1	0	0	0	0	1	0	0	1	1	1	0	2	0
398	1	68	0	1.64	59	1	21.9	1	1	0	0	0	100	60	0	0	0	0	0	0	0	0	0	1	2	0	1	1	0	0	0	1	0	1	0	1	1	1	0	0	1	0	0	1	0	0	0	2	0
399	1	62	0	1.65	61.5	0	22.6	1	1	0	0	0	120	78	0	0	0	0	0	1	0	0	0	3	3	0	1	1	0	0	0	1	0	1	0	1	0	0	0	0	0	0	0	1	0	0	0	1	0
400	2	79	1	1.58	68	0	27.2	4	0	0	1	0	131	64	0	0	1	0	0	1	0	0	0	3	3	0	1	0	1	0	0	1	0	1	0	1	1	1	0	1	1	0	0	1	0	0	0	3	0
401	2	66	0	1.56	49	1	20.1	1	1	0	0	0	169	78	0	0	0	0	0	1	0	0	0	1	1	1	1	1	0	0	0	1	0	1	1	1	1	1	0	0	1	0	0	1	0	0	0	2	0
402	1	73	0	1.72	70	0	23.7	4	0	0	1	0	143	86	0	1	1	0	0	1	0	0	0	1	3	0	1	1	0	0	0	1	0	1	0	1	1	1	0	0	1	1	0	1	0	0	0	2	0
403	1	55	0	1.65	84	0	30.9	1	1	0	0	0	170	120	0	1	0	0	0	1	0	0	0	1	1	0	1	0	1	0	0	0	1	1	1	1	0	0	0	0	1	0	0	1	0	0	0	2	0
404	1	74	0	1.75	94	0	30.7	1	1	0	0	0	120	93	0	1	1	0	0	1	0	0	0	3	2	0	1	1	0	0	0	1	0	1	1	1	0	1	0	0	1	0	0	1	0	0	0	1	0
406	1	65	0	1.62	52	1	19.8	4	0	0	1	0	90	56	0	0	1	0	0	0	0	0	0	1	3	0	1	0	1	0	0	0	0	1	0	1	1	0	0	0	1	0	0	1	0	0	0	3	0
409	1	70	0	1.6	58	1	22.7	1	1	0	0	0	110	70	0	0	0	1	0	0	0	0	0	1	3	1	1	1	0	0	0	1	0	1	0	1	1	1	1	1	1	0	0	0	1	0	0	3	0
410	1	51	0	1.6	79	0	30.9	4	0	0	1	0	110	70	0	0	0	0	0	1	0	0	0	3	1	0	1	1	0	0	0	1	0	0	0	1	0	0	0	0	1	0	0	1	0	0	0	3	0
411	2	75	1	1.57	49	1	19.9	4	0	0	1	0	99	64	0	0	1	0	0	0	0	0	0	1	1	0	1	0	1	0	0	0	0	1	0	1	0	0	0	0	1	0	0	1	0	0	0	3	0
412	1	65	0	1.76	72	0	23.2	2	0	1	0	0	152	80	0	1	1	0	0	1	0	0	0	3	2	0	1	1	0	0	0	1	0	1	1	1	1	1	0	0	1	0	0	1	0	0	0	2	0
413	1	61	0	1.75	54	1	17.6	4	0	0	1	0	148	74	0	1	0	0	0	0	0	0	0	3	2	0	1	1	0	0	0	1	0	1	0	1	1	1	0	0	1	0	0	1	0	0	0	2	0
415	2	63	0	1.56	56	1	23	2	0	1	0	0	102	76	0	0	1	1	0	1	0	0	0	1	3	1	1	1	0	0	0	1	0	1	0	1	0	1	1	1	1	1	0	1	0	0	0	3	0
416	1	47	0	1.69	76.6	0	26.8	4	0	0	1	0	112	74	0	0	0	0	0	1	0	0	0	1	3	NA	1	1	0	0	0	1	0	1	0	1	1	0	0	0	0	0	0	1	0	0	0	3	0
417	1	76	1	1.67	64.5	0	23.1	1	1	0	0	0	128	71	0	0	1	0	0	0	1	0	0	1	1	0	1	1	0	0	0	1	0	1	0	1	0	1	0	0	0	1	0	1	0	0	0	3	0
418	2	81	1	1.54	46	1	19.4	4	0	0	1	0	108	72	0	0	1	0	0	0	0	0	0	1	1	0	1	0	1	0	0	0	0	1	0	1	1	0	0	0	1	0	0	1	0	0	0	1	0
419	1	61	0	1.71	75	0	25.6	1	1	0	0	0	160	102	0	1	0	0	0	1	0	0	0	3	3	0	1	1	0	0	0	1	0	1	1	1	0	0	0	0	0	0	0	1	0	0	0	2	0
420	1	75	1	1.55	61.6	0	25.6	1	1	0	0	0	160	100	0	1	1	0	0	1	0	0	0	2	3	0	1	1	0	0	0	1	0	1	1	1	0	0	0	0	1	1	0	0	1	0	0	2	0
421	1	62	0	1.65	73.5	0	27	5	0	0	0	1	126	78	0	0	0	1	0	1	1	0	0	2	3	0	1	1	0	0	0	1	0	1	0	1	1	1	1	1	0	0	0	1	0	0	0	3	0
422	1	75	1	1.68	75	0	26.6	1	1	0	0	0	120	70	0	0	0	0	0	1	0	0	0	1	1	0	1	1	0	0	0	1	0	1	0	1	0	1	0	0	1	0	0	1	0	0	0	3	0
423	1	73	0	1.64	60	0	22.3	2	0	1	0	0	139	73	0	0	0	0	0	1	1	0	0	2	2	0	1	1	0	0	0	1	0	1	0	1	1	0	0	0	1	0	0	1	0	0	0	3	0
424	1	73	0	1.65	78	0	28.7	4	0	0	1	0	122	82	0	0	0	0	0	1	0	0	0	1	1	0	1	0	1	0	0	0	0	1	0	1	1	0	0	0	1	0	0	1	0	0	1	3	0
425	2	62	0	1.52	60	0	26	4	0	0	1	0	116	98	0	0	0	1	0	1	0	0	0	1	3	1	1	1	0	0	0	1	0	0	0	1	1	0	0	1	1	0	0	1	0	0	0	3	0
426	1	41	0	1.66	62	0	22.5	4	0	0	1	0	90	60	0	1	0	0	0	0	0	0	0	3	3	0	1	1	0	0	0	0	0	1	0	1	1	0	0	0	1	0	0	1	0	0	0	3	0
427	1	73	0	1.6	44	1	17.2	2	0	1	0	0	120	70	0	1	0	1	0	1	0	0	0	3	3	1	1	1	0	0	0	1	0	1	0	1	1	1	1	0	1	0	1	0	1	0	1	4	0
428	1	82	1	1.71	75	0	25.6	4	0	0	1	0	130	78	0	0	1	1	0	0	0	0	0	3	3	1	1	1	0	1	0	1	0	1	0	1	1	1	0	0	1	0	1	1	0	0	0	2	0
429	1	51	0	1.71	82	0	28	4	0	0	1	0	152	82	0	0	0	0	0	1	0	0	0	3	3	0	1	1	0	0	0	1	0	1	0	1	1	0	0	0	1	0	0	1	0	0	0	4	1
431	2	67	0	1.55	58	1	24.1	1	1	0	0	0	130	80	0	1	1	0	0	1	0	0	0	1	1	0	1	1	0	0	0	1	0	1	1	1	0	0	0	0	0	0	0	1	0	0	0	3	0
432	2	78	1	1.5	50	1	22.2	1	1	0	0	0	120	80	0	1	0	0	0	1	0	0	0	1	1	0	1	1	0	0	0	1	0	1	0	1	0	0	0	0	0	0	1	1	0	0	0	3	0
434	1	66	0	1.65	60.7	0	22.3	4	0	0	1	0	90	42	0	0	0	1	0	0	0	0	0	3	2	0	1	0	1	0	0	0	0	1	0	1	1	1	1	1	1	0	1	1	0	0	0	3	0
435	1	74	0	1.6	54	1	21.1	1	1	0	0	0	134	74	0	0	1	1	1	0	0	0	0	1	1	0	1	1	0	0	0	1	0	1	0	1	0	1	0	0	1	0	1	1	0	0	0	4	1
436	1	62	0	1.65	70	0	25.7	3	0	0	0	1	145	85	0	0	0	0	0	1	0	0	0	1	2	0	1	1	0	0	0	1	0	1	0	1	0	1	0	0	1	0	1	1	0	0	0	3	0
438	1	75	1	1.62	78	0	29.7	1	1	0	0	0	150	94	0	1	1	0	0	1	0	0	0	3	3	0	1	1	0	0	0	0	0	1	1	1	0	1	0	0	1	0	0	1	0	0	0	3	0
440	2	61	0	1.52	50.5	1	21.9	1	1	0	0	0	90	60	0	0	1	0	0	1	0	0	0	1	1	0	1	0	1	0	0	1	0	1	0	1	0	1	0	0	1	0	0	1	0	0	0	3	0
441	1	71	0	1.58	58.5	1	23.4	3	0	0	0	1	132	58	0	1	1	0	0	1	1	0	0	1	1	1	1	0	1	0	0	0	1	1	1	1	1	1	0	0	0	1	0	0	1	0	0	4	1
442	1	61	0	1.66	66	0	24	3	0	0	0	1	110	76	0	1	1	0	0	1	0	0	1	1	1	1	1	0	1	0	0	1	0	1	0	1	0	0	0	0	1	0	0	1	0	0	0	2	0
443	1	78	1	1.7	61	0	21.1	1	1	0	0	0	120	80	0	0	1	0	0	0	0	0	0	1	1	0	1	1	0	1	0	0	0	1	0	1	1	1	0	0	1	0	1	1	0	0	0	4	1
444	2	58	0	1.55	69	0	28.7	3	0	0	0	1	120	80	0	0	1	0	0	0	0	0	0	1	1	0	1	1	0	0	0	1	0	1	0	1	1	0	0	0	1	0	0	1	0	0	0	2	0
445	2	71	0	1.6	62.5	0	24.4	4	0	0	1	0	119	68	0	0	1	1	0	1	0	0	0	1	1	0	1	1	0	0	0	1	0	1	0	1	1	0	0	1	1	0	0	0	1	0	0	3	0
446	1	70	0	1.62	64	0	24.4	1	1	0	0	0	140	85	0	1	1	0	0	1	0	0	0	3	1	0	1	1	0	0	0	1	0	1	0	1	1	1	0	0	1	0	0	1	0	0	0	1	0
447	1	62	0	1.6	61	0	23.8	2	0	1	0	0	140	80	0	0	1	0	0	1	0	0	1	1	3	0	1	0	1	0	0	1	0	0	0	1	1	1	0	0	1	1	0	1	0	0	0	3	0
448	2	65	0	1.44	48	1	23.1	1	1	0	0	0	143	78	0	0	0	0	0	1	0	0	0	1	1	0	1	1	0	0	0	1	0	1	1	1	1	1	0	1	1	0	0	0	1	0	0	2	0
449	1	62	0	1.68	70	0	24.8	3	0	0	0	1	160	90	1	0	0	0	0	1	0	0	0	1	1	NA	1	1	0	0	0	0	1	1	1	1	1	1	0	1	0	0	0	1	0	0	0	1	0
450	1	37	0	1.73	67	0	22.4	4	0	0	1	0	99	69	0	0	0	0	0	0	0	0	0	3	3	0	1	1	0	0	0	1	0	0	0	1	1	0	0	0	1	0	0	1	0	0	0	2	0
451	1	68	0	1.6	60	0	23.4	2	0	1	0	0	128	66	0	1	1	0	0	0	0	0	0	3	3	0	1	0	1	0	0	1	0	0	0	1	1	0	0	0	1	1	0	1	0	0	0	2	0
452	1	68	0	1.66	70	0	25.4	1	1	0	0	0	168	96	0	1	1	0	0	1	0	0	0	1	1	0	1	1	0	0	0	1	0	1	1	1	1	0	0	0	0	0	0	1	0	0	0	4	1
453	2	76	1	1.48	47	1	21.5	5	0	0	0	1	168	86	0	1	0	0	0	1	0	0	0	1	1	0	1	1	0	0	0	0	1	0	1	1	0	0	0	0	1	0	0	1	0	0	0	3	0
454	1	63	0	1.58	64	0	25.6	2	0	1	0	0	150	78	0	0	1	0	0	1	0	0	0	1	1	0	1	0	1	0	0	1	0	0	0	1	1	0	0	0	1	0	0	1	0	0	0	3	0
455	1	46	0	1.75	64	0	20.9	4	0	0	1	0	105	58	0	0	0	0	0	0	0	0	0	3	3	0	1	1	0	0	0	1	0	1	0	1	1	0	0	0	1	0	1	1	0	0	0	1	0
456	2	69	0	1.52	50.9	1	22	1	1	0	0	0	134	66	0	0	0	0		1	0	0	0	1	1	1	1	1	0	0	0	0	1	1	0	1	0	0	0	0	1	0	0	1	0	0	0	2	0
457	2	51	0	1.53	60	0	25.6	1	1	0	0	0	110	70	0	0	0	0	0	1	1	0	1	1	1	0	1	1	0	0	0	0	1	1	0	1	1	0	0	0	0	0	0	1	0	0	0	3	0
458	1	50	0	1.68	78	0	27.6	5	0	0	0	1	126	100	0	0	1	1	0	0	1	0	0	3	3	0	1	1	0	0	0	1	0	1	0	1	1	0	0	1	0	0	0	1	0	0	0	2	0
459	1	65	0	1.68	63.5	0	22.5	2	0	1	0	0	138	76	0	1	0	0	0	0	0	0	0	1	3	0	1	1	0	0	0	1	0	0	0	1	1	0	0	0	1	0	0	1	0	0	0	3	0
460	1	70	0	1.65	70.5	0	25.9	1	1	0	0	0	126	70	0	0	0	0	0	1	0	0	0	3	3	0	1	0	1	0	0	1	0	1	0	1	1	0	0	0	0	0	0	0	1	0	0	2	0
461	1	61	0	1.7	66	0	22.8	4	0	0	1	0	130	84	0	1	1	1	0	1	0	0	0	3	1	0	1	1	0	0	0	1	0	1	0	1	1	1	0	0	1	0	0	1	0	0	0	1	0
462	2	45	0	1.44	60	0	28.9	2	0	1	0	0	129	75	0	0	1	0	0	1	0	0	0	1	1	0	1	1	0	0	0	1	0	0	0	1	0	0	0	0	1	1	0	1	0	0	0	2	0
463	1	57	0	1.65	66	0	24.2	2	0	1	0	0	140	94	0	1	0	0	0	1	0	0	0	2	3	0	1	1	0	0	0	1	0	1	1	1	1	1	0	0	1	0	0	1	0	0	0	2	0
464	1	44	0	1.62	61.8	0	23.5	4	0	0	1	0	125	78	0	1	1	0	0	0	1	0	0	1	2	0	1	0	1	0	0	1	0	1	0	1	1	0	0	0	1	0	0	1	0	0	0	3	0
465	1	55	0	1.72	75.5	0	25.5	1	1	0	0	0	138	80	0	0	0	0	0	0	0	0	0	1	2	0	1	0	1	0	0	1	0	1	0	1	1	0	0	0	1	0	0	1	0	0	0	2	0
466	1	59	0	1.69	70	0	24.5	4	0	0	1	0	128	75	0	0	0	0	0	1	0	0	0	1	3	0	1	1	0	0	0	1	0	1	0	1	1	0	1	1	1	0	1	1	0	0	0	3	0
467	1	79	1	1.68	60	0	21.3	4	0	0	1	0	123	79	1	0	0	0	0	0	0	0	0	3	1	1	1	1	0	0	0	1	0	1	0	1	1	0	0	0	1	0	0	1	1	1	1	1	0
468	1	78	1	1.63	63	0	23.7	1	1	0	0	0	130	64	0	1	0	0	0	0	0	0	0	2	3	0	1	1	0	0	0	0	0	0	0	1	1	1	0	0	1	0	0	0	1	0	0	1	0
469	1	73	0	1.6	61	0	23.8	1	1	0	0	0	146	76	0	0	0	0	0	1	0	0	0	2	2	0	1	1	0	0	0	1	0	1	0	1	1	0	0	0	1	0	0	0	1	0	0	3	0
470	1	61	0	1.6	60	0	23.4	4	0	0	1	0	129	72	0	0	1	0	0	1	0	0	0	1	1	0	1	0	1	0	0	1	0	1	1	1	1	0	0	0	1	0	0	1	0	0	0	3	0
472	1	59	0	1.68	69	0	24.4	2	0	1	0	0	136	76	0	1	0	0	0	1	0	0	0	3	3	0	1	1	0	1	0	1	0	1	0	1	1	0	0	0	1	0	0	1	0	0	0	3	0
473	1	48	0	1.75	55	1	18	4	0	0	1	0	128	89	0	0	0	1	0	1	0	0	0	3	1	0	1	0	1	0	0	1	0	1	0	1	1	0	0	0	1	0	0	1	0	0	0	2	0
474	1	87	1	1.5	48	1	21.3	1	1	0	0	0	146	72	0	1	0	0	0	1	0	0	1	2	2	0	1	1	0	0	0	1	0	1	1	1	0	1	0	0	1	0	0	0	1	0	0	3	0
475	1	53	0	1.64	59.5	1	22.1	1	1	0	0	0	140	89	0	1	1	0	0	1	1	0	0	1	2	0	1	1	0	0	0	0	1	1	0	1	0	1	0	0	0	0	0	1	1	1	0	3	0
476	1	64	0	1.76	71.5	0	23.1	2	0	1	0	0	120	80	0	0	0	0	0	1	0	0	0	3	3	0	1	1	0	0	0	1	0	1	1	1	0	0	0	0	1	0	0	1	0	0	0	1	0
477	1	65	0	1.7	62	0	21.5	5	0	0	0	1	134	88	1	1	0	0	0	1	0	0	1	1	2	1	1	1	0	0	0	1	0	1	0	1	0	0	0	1	1	0	0	1	1	1	0	3	0
478	1	69	0	1.72	52	1	17.6	1	1	0	0	0	171	91	1	1	0	0	0	1	0	0	0	2	2	1	1	1	0	0	0	0	1	1	1	1	1	1	0	0	1	0	0	1	1	1	0	4	1
479	2	63	0	1.5	52.5	1	23.3	1	1	0	0	0	132	90	0	0	1	0	0	1	0	0	0	1	1	1	1	1	0	0	0	0	0	1	0	1	0	1	0	1	0	0	0	1	0	0	0	2	0
481	1	64	0	1.4	36	1	18.4	4	0	0	1	0	86	56	0	1	0	0	0	0	0	0	0	1	3	0	1	0	1	0	0	1	0	1	0	1	1	0	0	0	1	0	0	1	0	0	0	2	0
482	2	69	0	1.58	47	1	18.8	3	0	0	0	1	105	54	0	1	1	0	0	1	1	0	1	1	1	1	1	0	1	0	0	0	0	1	1	1	0	1	0	0	0	1	0	1	1	1	0	3	0
483	1	76	1	1.72	57	1	19.3	2	0	1	0	0	96	68	0	0	0	0	0	0	0	0	0	1	1	1	1	1	0	0	0	1	0	1	0	1	0	0	0	0	1	0	0	1	1	1	0	2	0
484	1	72	0	1.65	60	0	22	1	1	0	0	0	135	58	0	1	0	0	0	1	0	0	0	1	3	0	1	1	0	0	0	1	0	1	1	1	0	1	0	0	1	0	0	1	1	1	0	3	0
486	2	66	0	1.55	53	1	22.1	1	1	0	0	0	130	80	0	0	0	0	0	1	0	0	0	1	1	0	1	0	1	0	0	1	0	1	0	1	0	0	0	0	1	0	0	1	1	1	0	2	0
487	1	68	0	1.63	67.5	0	25.4	5	0	0	0	1	126	76	0	1	0	0	0	1	0	0	0	2	1	0	1	1	0	0	0	1	0	1	1	1	0	1	0	0	0	0	0	1	0	0	0	4	0
489	1	64	0	1.68	74	0	26.2	1	1	0	0	0	155	95	0	1	0	0	0	1	0	0	0	1	2	0	1	1	0	0	0	1	0	1	1	1	0	1	0	0	0	0	0	1	0	0	0	2	0
490	1	47	0	1.59	56	1	22.2	1	1	0	0	0	160	100	1	0	0	0	0	1	0	0	1	1	1	0	1	0	1	0	0	1	0	1	1	1	0	0	0	0	1	0	0	1	0	0	0	3	0
491	1	82	1	1.58	56	1	22.4	1	1	0	0	0	160	70	1	0	0	0	0	1	1	0	0	2	2	1	1	1	0	0	0	0	0	1	1	1	0	1	0	0	0	0	0	1	0	0	0	2	0
492	1	72	0	1.6	56.5	1	22.1	1	1	0	0	0	140	70	0	1	0	0	0	1	0	0	0	3	2	1	1	1	0	0	0	0	1	1	0	1	1	0	0	0	1	0	0	0	1	0	0	2	0
493	1	69	0	1.65	61.5	0	22.6	1	1	0	0	0	168	80	0	1	1	0	0	1	1	0	0	1	1	0	1	0	1	0	0	0	0	0	1	1	0	0	0	0	1	1	0	0	1	0	0	3	0
495	1	55	0	1.7	70	0	24.2	2	0	1	0	0	120	70	0	0	1	0	0	1	0	0	0	3	3	0	1	1	0	0	0	1	0	1	0	1	1	0	0	0	1	0	0	1	0	0	0	1	0
497	1	85	1	1.5	41	1	18.2	1	1	0	0	0	108	58	0	0	0	0	0	0	0	0	0	1	2	1	1	1	0	0	0	0	0	1	0	1	0	1	0	0	1	0	0	0	1	0	0	3	0
498	1	75	1	1.65	46	1	16.9	1	1	0	0	0	160	90	0	0	0	0	0	0	0	0	0	1	1	0	1	0	1	0	0	0	1	1	0	1	1	0	0	0	1	0	0	1	0	0	0	4	1
499	1	69	0	1.65	58	1	21.3	4	0	0	1	0	132	80	0	0	0	0	0	0	0	0	0	3	3	1	1	1	0	0	0	1	0	0	0	1	1	0	0	0	1	0	0	1	0	0	0	2	0
500	1	66	0	1.52	51	1	22.1	5	0	0	0	1	110	70	0	0	0	0	0	1	0	0	0	1	1	0	1	0	1	0	0	1	0	1	1	1	0	0	0	0	1	0	0	1	0	0	0	1	0
501	1	56	0	1.7	59.5	1	20.6	1	1	0	0	0	130	85	0	1	1	0	0	1	0	0	0	3	1	0	1	1	0	0	0	1	0	1	1	1	1	0	0	0	1	0	0	1	0	0	0	1	0
502	2	74	0	1.55	42.6	1	17.7	2	0	1	0	0	132	80	0	1	0	0	0	1	0	0	1	1	1	0	1	1	0	0	0	1	0	1	1	1	1	0	0	0	1	0	1	0	1	0	0	3	0
503	1	66	0	1.65	NA	NA	NA	4	0	0	1	0	82	57	0	0	1	0	0	0	0	0	0	3	3	0	1	1	0	1	0	0	0	0	0	1	1	0	0	1	1	0	1	0	1	0	0	4	1
504	1	68	0	1.64	62	0	23.1	4	0	0	1	0	88	52	0	1	1	0	0	0	0	0	0	1	1	0	1	1	0	0	0	0	0	1	0	1	0	0	0	0	1	1	0	1	0	0	0	3	0
505	1	66	0	1.63	75	0	28.2	4	0	0	1	0	149	87	0	0	1	1	0	1	0	0	0	1	1	0	1	0	1	0	0	1	0	1	0	1	1	0	0	0	1	1	0	1	0	0	0	2	0
508	2	77	1	1.55	65	0	27.1	4	0	0	1	0	108	77	0	1	1	1	0	1	0	0	0	1	3	1	1	1	0	0	0	1	0	1	0	1	1	0	0	0	1	1	0	1	0	0	0	3	0
509	1	51	0	1.67	70	0	25.1	1	1	0	0	0	170	100	0	1	0	0	0	1	0	0	0	1	1	0	1	1	0	0	0	0	1	1	1	1	0	1	0	0	0	0	0	1	0	0	0	3	0
510	1	49	0	1.76	81	0	26.1	4	0	0	1	0	150	96	0	1	1	0	0	1	0	0	0	1	2	0	1	0	1	0	0	1	0	1	0	1	0	0	0	0	1	1	0	1	0	0	0	3	0
511	1	67	0	1.6	54	1	21.1	5	0	0	0	1	120	80	0	1	1	0	0	1	0	0	1	2	2	0	1	1	0	0	0	1	0	1	1	1	1	0	0	1	0	1	0	1	0	0	0	1	0
512	2	57	0	1.5	60	0	26.7	1	1	0	0	0	132	82	0	1	1	0	0	1	0	0	1	1	1	0	1	1	0	0	0	1	0	1	0	1	1	1	0	0	1	1	0	1	0	0	0	3	0
513	1	71	0	1.68	63.5	0	22.5	4	0	0	1	0	120	80	0	1	0	0	0	1	0	0	1	3	1	0	1	1	0	0	0	1	0	1	0	1	0	0	0	0	1	0	0	0	1	0	0	2	0
514	1	67	0	1.7	80	0	27.7	2	0	1	0	0	118	78	1	1	0	1	0	1	0	0	0	2	3	1	1	0	1	0	0	1	0	0	1	1	1	0	0	0	1	0	0	1	0	0	0	3	0
515	1	67	0	1.7	89	0	30.8	4	0	0	1	0	155	56	0	0	1	0	0	1	0	0	0	3	3	0	1	1	0	0	0	1	0	1	1	1	1	0	0	0	1	0	0	1	0	0	0	2	0
518	2	73	0	1.58	49	1	19.6	1	1	0	0	0	127	58	0	0	1	0	1	0	0	0	0	1	1	0	1	0	1	0	0	1	0	1	0	1	0	1	0	0	1	0	1	1	0	0	0	4	1
519	1	56	0	1.86	96	0	27.7	4	0	0	1	0	151	84	0	0	1	0	0	1	0	0	0	1	3	0	1	1	0	0	0	0	0	0	0	1	1	0	0	0	1	0	0	1	0	0	0	3	0
520	2	69	0	1.56	57.8	1	23.8	2	0	1	0	0	124	63	0	1	1	0	0	1	0	0	0	1	1	1	1	1	0	0	0	1	0	0	0	1	1	0	0	0	1	0	0	1	0	0	0	1	0
522	2	64	0	1.55	46.7	1	19.4	4	0	0	1	0	114	71	0	1	0	0	0	0	0	0	0	1	1	0	1	0	1	0	1	1	0	0	0	1	1	0	0	0	1	0	0	1	0	0	0	1	0
523	1	58	0	1.6	47	1	18.4	4	0	0	1	0	186	58	0	0	1	0	1	0	0	0	0	1	3	0	1	0	1	0	0	0	0	0	0	1	1	0	0	0	1	0	0	1	0	0	0	4	1
524	1	64	0	1.68	64	0	22.7	4	0	0	1	0	109	61	0	1	1	0	0	0	0	0	0	3	3	0	1	0	1	0	0	0	0	1	0	1	1	1	0	0	1	0	0	1	0	0	0	2	0
525	1	61	0	1.68	84	0	29.8	2	0	1	0	0	120	72	0	1	1	0	0	1	0	0	0	3	3	0	1	1	0	0	0	0	1	1	0	1	0	1	0	0	1	1	0	1	0	0	0	3	0
527	2	72	0	1.55	53.5	1	22.3	1	1	0	0	0	140	80	0	1	1	0	0	1	0	0	1	1	1	1	1	1	0	0	0	1	0	1	0	1	0	1	0	0	1	1	0	1	0	0	0	3	0
528	2	69	0	1.55	66.5	0	27.7	3	0	0	0	1	170	80	0	1	1	0	0	1	0	0	0	1	1	0	1	1	0	0	0	1	0	1	1	1	0	0	0	0	1	1	0	1	0	0	0	2	0
529	1	75	1	1.68	71	0	25.2	5	0	0	0	1	120	74	0	0	1	0	0	0	1	0	0	1	2	0	1	0	1	0	0	1	0	1	0	1	0	1	0	0	0	1	0	1	0	0	0	3	0
530	1	80	1	1.6	59.5	1	23.2	5	0	0	0	1	152	72	1	0	1	0	0	1	0	0	0	1	1	1	1	1	0	0	0	1	0	1	0	1	0	1	0	0	1	1	0	0	1	0	0	3	0
531	1	77	1	1.62	70	0	26.7	1	1	0	0	0	188	60	0	1	0	1	0	1	0	0	0	1	3	0	1	0	1	0	0	0	0	1	1	1	1	1	0	1	1	0	1	1	0	0	0	4	1
532	2	80	1	1.56	36	1	14.8	4	0	0	1	0	111	73	0	0	1	0	0	0	0	0	0	1	1	0	1	1	0	0	0	1	0	0	0	1	0	0	0	0	1	1	0	1	0	0	0	3	0
533	2	67	0	1.48	45	1	20.5	1	1	0	0	0	97	53	0	0	0	0	0	0	0	0	0	1	3	0	1	1	0	0	0	0	0	1	0	1	0	1	0	0	1	0	0	0	1	0	0	1	0
534	1	60	0	1.78	79	0	24.9	4	0	0	1	0	128	80	0	1	1	0	0	1	0	0	0	1	2	0	1	1	0	0	0	1	0	0	0	1	1	0	0	0	1	0	0	1	0	0	0	3	0
535	1	80	1	1.7	48.5	1	16.8	1	1	0	0	0	130	70	0	0	0	0	0	1	0	0	0	1	3	0	1	1	0	0	0	1	0	1	0	1	0	1	0	0	0	0	0	0	1	0	0	3	0
536	2	72	0	1.55	62	0	25.8	4	0	0	1	0	112	64	0	0	1	1	0	1	0	0	0	1	1	1	1	1	0	0	0	1	0	0	0	1	1	1	1	1	1	1	0	0	1	0	0	3	0
537	2	56	0	1.62	54.5	1	20.8	5	0	0	0	1	180	100	0	0	1	0	0	1	0	0	0	1	1	0	1	1	0	0	0	1	0	1	1	1	0	0	0	0	0	0	0	1	0	0	0	3	0
538	1	66	0	1.62	72	0	27.4	4	0	0	1	0	142	84	0	1	1	0	0	1	0	0	0	3	2	0	1	1	0	0	0	1	0	1	1	1	0	0	0	0	1	1	0	1	0	0	0	3	0
539	1	72	0	1.5	41.5	1	18.4	1	1	0	0	0	120	80	0	1	0	0	0	1	0	0	0	1	3	1	1	1	0	0	0	1	0	0	1	1	1	1	0	0	1	0	0	0	1	0	0	2	0
540	1	57	0	1.66	51	1	18.5	5	0	0	0	1	125	85	0	1	0	0	0	1	0	0	0	2	3	0	1	1	0	0	0	0	1	1	1	1	0	0	0	0	0	0	0	0	1	0	0	2	0
541	1	59	0	1.69	79	0	27.7	1	1	0	0	0	138	82	0	1	1	0	0	1	0	0	0	3	3	0	1	1	0	0	0	1	0	1	1	1	0	0	0	0	0	1	0	1	0	0	0	3	0
542	1	66	0	1.57	40	1	16.2	1	1	0	0	0	140	78	0	0	0	0	0	1	0	0	0	1	2	0	1	0	1	0	0	0	0	1	1	1	0	0	0	0	0	0	0	1	0	0	0	1	0
543	1	52	0	1.64	78	0	29	2	0	1	0	0	153	89	0	0	1	0	0	1	0	0	0	2	3	0	1	1	0	0	0	0	1	0	0	1	0	0	0	0	1	0	0	1	0	0	0	2	0
544	1	36	0	1.6	63	0	24.6	2	0	1	0	0	146	92	0	0	0	0	0	1	0	0	0	1	1	0	1	1	0	0	0	0	1	1	1	1	0	0	0	0	1	0	0	1	0	0	0	1	1
545	1	78	1	1.6	55.7	1	21.8	2	0	1	0	0	111	56	0	0	0	1	0	0	0	0	0	3	3	0	1	0	1	0	0	1	0	1	0	1	0	1	0	1	1	0	1	0	1	0	0	3	0
546	2	76	1	1.62	51	1	19.4	2	0	1	0	0	140	81	0	1	1	0	0	1	0	0	1	3	3	0	1	0	1	0	0	1	0	1	1	1	1	0	0	0	1	1	0	0	1	0	0	2	0
547	1	58	0	1.7	76.8	0	26.6	1	1	0	0	0	122	70	0	1	1	0	0	1	0	0	0	1	3	0	1	1	0	0	0	1	0	1	1	1	1	0	0	0	0	1	0	1	0	0	0	3	0
548	1	39	0	1.75	70	0	22.9	2	0	1	0	0	100	70	0	0	0	0	0	0	0	0	0	3	3	0	1	1	0	0	0	1	0	1	0	1	1	0	0	0	1	0	0	1	0	0	0	1	0
549	2	48	0	1.5	70	0	31.1	4	0	0	1	0	118	73	1	0	0	1	0	1	0	0	0	1	1	1	1	1	0	0	0	1	0	1	0	1	1	1	1	1	1	0	0	1	0	0	0	3	0
550	1	63	0	1.58	48.5	1	19.4	4	0	0	1	0	152	91	0	0	0	0	0	0	0	0	0	1	3	0	1	1	0	0	0	0	0	1	0	1	1	0	0	0	1	0	0	1	0	0	0	3	0
551	1	79	1	1.6	63	0	24.6	5	0	0	0	1	110	64	0	0	1	0	0	0	1	0	0	3	2	0	1	1	0	0	0	1	0	1	0	1	0	1	0	0	0	1	0	1	0	0	0	2	0
552	1	75	1	1.65	60	0	22	4	0	0	1	0	148	106	0	0	0	0	0	0	0	0	1	1	1	0	1	1	0	0	0	1	0	1	0	1	0	0	0	0	1	0	0	1	1	1	0	3	0
553	1	75	1	1.55	70	0	29.1	2	0	1	0	0	119	82	0	1	0	0	0	1	0	0	1	2	3	0	1	0	1	0	0	1	0	1	0	1	1	0	0	0	1	0	1	0	1	0	0	2	0
554	2	75	1	1.68	50	1	17.7	2	0	1	0	0	142	72	0	1	1	0	0	0	0	0	0	1	1	1	1	1	0	0	0	1	0	1	0	1	0	0	0	0	1	1	0	0	1	0	0	3	0
555	1	48	0	1.76	77	0	24.9	2	0	1	0	0	122	92	0	0	1	0	0	0	0	0	0	1	1	0	1	1	0	0	0	1	0	1	0	1	0	0	0	0	1	1	0	1	0	0	0	3	0
556	1	58	0	1.63	58	1	21.8	4	0	0	1	0	115	72	0	1	1	0	0	0	0	0	0	3	3	NA	1	1	0	0	0	1	0	1	0	1	0	0	0	0	1	0	0	0	1	0	0	3	0
558	1	63	0	1.7	70	0	24.2	4	0	0	1	0	126	86	0	1	0	0	0	1	0	0	1	2	3	0	1	1	0	0	0	1	0	1	0	1	1	0	0	0	1	0	0	1	0	0	0	3	0
559	1	59	0	1.69	70	0	24.5	1	1	0	0	0	150	90	0	1	1	0	0	1	0	0	0	1	1	0	1	0	1	0	0	0	1	0	0	1	0	1	0	0	0	1	0	1	0	0	0	1	0
560	1	61	0	1.73	74.3	0	24.8	5	0	0	0	1	170	115	0	0	1	1	1	1	0	0	0	1	2	0	1	1	0	0	0	0	1	1	1	0	1	1	1	1	0	1	0	1	0	0	0	3	0
561	2	72	0	1.65	66	0	24.2	1	1	0	0	0	183	72	0	1	1	1	0	1	0	0	0	1	1	1	1	1	0	0	0	1	0	0	1	1	1	1	0	1	1	1	0	1	0	0	0	2	0
562	1	48	0	1.68	59	1	20.9	2	0	1	0	0	120	80	0	1	0	0	0	1	0	0	0	2	3	0	1	1	0	0	0	1	0	1	0	1	1	0	0	0	1	0	0	1	0	0	0	1	0
563	1	78	1	1.63	60.5	0	22.8	5	0	0	0	1	165	78	0	1	0	0	0	1	1	0	1	2	3	0	1	1	0	0	0	1	0	1	1	1	0	0	0	0	1	0	0	1	1	1	0	3	0
564	1	81	1	1.65	69	0	25.3	2	0	1	0	0	113	62	0	0	0	0	0	1	0	0	0	3	3	0	1	1	0	0	0	1	0	0	1	1	0	1	0	0	1	0	0	1	0	0	0	3	0
565	2	65	0	1.54	52	1	21.9	2	0	1	0	0	118	72	0	0	1	0	0	1	0	0	0	1	1	0	1	0	1	0	0	0	1	1	0	1	1	1	0	0	1	0	1	1	0	0	0	4	1
566	1	80	1	1.66	55.7	1	20.2	2	0	1	0	0	146	78	0	1	1	0	0	1	1	0	0	2	2	1	1	1	0	0	0	0	1	1	1	1	1	1	0	0	1	0	0	0	1	0	0	3	0
567	2	73	0	1.52	73	0	31.6	3	0	0	0	1	199	105	0	1	1	0	0	1	0	0	0	1	1	0	1	1	0	0	0	0	1	1	1	1	0	0	0	0	1	0	0	1	1	1	0	2	0
568	2	69	0	1.56	67	0	27.5	4	0	0	1	0	111	75	0	0	0	1	0	1	0	0	0	1	1	0	1	1	0	0	0	1	0	1	0	1	1	1	1	1	1	0	1	1	0	0	0	3	0
569	2	53	0	1.53	52	1	22.2	1	1	0	0	0	170	100	0	0	0	0	0	1	0	0	0	1	1	0	1	1	0	0	0	1	0	1	1	1	0	0	0	1	0	0	0	1	0	0	0	1	0
570	2	77	1	1.58	57.1	1	22.9	1	1	0	0	0	162	76	0	1	1	0	0	1	1	0	0	1	1	1	1	1	0	0	0	1	0	1	1	1	0	1	0	0	1	0	0	0	1	0	0	3	0
571	1	59	0	1.7	50.2	1	17.4	1	1	0	0	0	154	74	0	0	0	0	0	1	0	0	0	3	2	0	1	1	0	0	0	0	1	0	1	1	1	1	0	0	0	0	0	1	0	0	0	1	0
572	1	62	0	1.6	57	1	22.3	5	0	0	0	1	120	80	0	0	0	0	0	1	0	0	0	1	1	1	1	1	0	0	0	1	0	1	0	1	0	1	1	1	0	0	0	0	1	0	0	3	0
573	2	75	1	1.56	55.5	1	22.8	1	1	0	0	0	116	65	0	0	0	0	0	0	0	0	0	1	1	0	1	1	0	0	0	1	0	1	0	1	0	0	0	0	1	0	0	1	1	1	0	2	0
574	2	64	0	1.5	63.5	0	28.2	1	1	0	0	0	130	66	1	0	0	1	0	1	0	0	0	1	1	1	1	1	0	0	0	0	1	1	0	1	1	1	1	0	1	0	0	0	1	0	0	3	0
576	2	67	0	1.48	55	1	25.1	1	1	0	0	0	160	100	0	1	0	0	0	1	0	0	0	1	1	0	1	1	0	0	0	0	0	0	1	1	0	0	0	0	1	0	0	1	0	0	0	1	0
578	1	68	0	1.57	76.8	0	31.2	1	1	0	0	0	158	80	0	1	1	1	0	1	0	0	1	1	1	0	1	1	0	0	0	1	0	1	1	1	0	1	0	0	1	1	0	1	0	0	0	2	0
579	1	87	1	1.82	97.6	0	29.5	4	0	0	1	0	130	70	0	1	0	0	0	1	0	0	0	1	1	1	1	1	0	0	0	1	0	1	1	1	0	0	0	0	1	0	0	0	1	0	0	2	0
581	2	69	0	1.56	43	1	17.7	2	0	1	0	0	154	77	0	0	1	1	0	1	0	0	0	1	1	0	1	1	0	0	0	1	0	1	1	1	0	1	0	1	1	1	0	0	1	0	0	3	0
582	2	58	0	1.45	60	0	28.5	4	0	0	1	0	102	68	0	1	0	0	0	1	0	0	0	1	1	0	1	1	0	0	0	1	0	1	0	1	0	0	0	0	1	0	0	1	0	0	0	2	0
583	1	58	0	1.68	49.1	1	17.4	4	0	0	1	0	132	69	0	0	0	0	0	1	0	0	0	1	3	0	1	1	0	0	0	1	0	1	1	1	1	0	0	0	1	0	0	1	0	0	0	3	0
585	2	64	0	1.5	53.7	1	23.9	3	0	0	0	1	120	70	0	0	1	0	0	1	0	0	0	1	1	0	1	1	0	0	0	1	0	1	1	1	0	1	0	0	1	0	0	1	0	0	0	3	0
586	2	66	0	1.65	52	1	19.1	1	1	0	0	0	141	85	0	1	0	0	0	1	0	0	0	1	1	0	1	1	0	0	0	1	0	0	0	1	0	1	0	0	1	0	0	1	0	0	0	2	0
587	1	56	0	1.68	64	0	22.7	4	0	0	1	0	98	52	0	0	1	0	0	1	0	0	0	1	3	0	1	1	0	0	0	1	0	0	0	1	0	0	0	0	1	1	0	1	0	0	0	1	0
588	1	81	1	1.61	75	0	28.9	1	1	0	0	0	120	70	0	1	1	0	0	1	0	0	0	1	1	0	1	1	0	0	0	1	0	0	1	1	0	0	0	0	0	1	0	1	0	0	0	3	0
589	2	64	0	1.58	50	1	20	1	1	0	0	0	182	90	0	0	1	0	0	1	0	0	0	1	1	0	1	0	1	0	0	1	0	1	1	1	0	1	0	0	1	0	0	1	0	0	0	3	0
590	2	50	0	1.55	55	1	22.9	1	1	0	0	0	128	86	0	0	1	0	0	1	0	0	0	1	1	0	1	1	0	0	0	1	0	1	0	1	0	1	1	1	0	0	0	1	0	0	0	2	0
591	2	65	0	1.52	62	0	26.8	1	1	0	0	0	100	80	0	0	0	0	0	1	0	0	0	1	1	0	1	1	0	0	0	0	1	1	1	1	0	1	0	0	1	0	0	1	0	0	0	2	0
592	1	44	0	1.63	70	0	26.3	2	0	1	0	0	151	93	0	1	1	0	0	1	0	0	1	1	3	0	1	0	1	0	0	1	0	1	1	1	1	1	0	0	1	0	0	1	0	0	0	3	0
593	1	53	0	1.7	74	0	25.6	2	0	1	0	0	146	94	0	0	1	0	0	1	0	0	0	3	3	0	1	0	1	0	1	1	0	1	0	1	1	0	0	0	1	0	0	1	0	0	0	3	0
594	2	72	0	1.6	65	0	25.4	2	0	1	0	0	120	76	0	0	1	0	0	1	0	0	0	1	1	0	1	0	1	0	0	1	0	1	0	1	1	0	0	0	1	0	0	1	0	0	0	1	0
595	2	64	0	1.52	49	1	21.2	1	1	0	0	0	106	68	0	0	0	0	0	1	0	0	0	1	1	0	1	1	0	0	0	0	0	0	0	1	0	0	0	0	0	0	0	1	0	0	0	1	0
596	1	50	0	1.46	49.9	1	23.4	2	0	1	0	0	128	80	0	0	1	1	0	1	0	0	0	3	3	0	1	1	0	0	0	1	0	1	0	1	1	0	0	0	1	0	0	1	0	0	0	2	0
597	1	45	0	1.68	67.2	0	23.8	1	1	0	0	0	124	80	0	0	1	0	0	1	0	0	0	3	3	0	1	1	0	0	0	1	0	0	1	1	1	1	0	0	1	0	0	1	0	0	0	3	0
598	1	68	0	1.61	56.4	1	21.8	3	0	0	0	1	120	80	0	0	1	0	0	1	1	0	0	3	3	0	1	1	0	0	0	1	0	1	0	1	1	1	0	0	1	0	0	1	0	0	0	3	0
600	2	68	0	1.67	62	0	22.2	5	0	0	0	1	167	62	0	0	1	1	0	0	0	0	0	1	1	0	1	1	0	0	0	1	0	1	0	1	1	1	1	1	1	1	0	1	0	0	0	3	0
601	1	69	0	1.7	71.6	0	24.8	4	0	0	1	0	142	78	0	0	1	0	0	1	0	0	0	3	3	0	1	1	0	0	0	1	0	1	1	1	0	0	0	0	1	0	0	1	0	0	0	2	0
602	1	69	0	1.65	65	0	23.9	2	0	1	0	0	125	70	0	0	1	1	0	1	0	0	0	2	1	1	1	1	0	0	0	0	0	1	1	1	1	0	0	0	1	1	0	1	0	0	0	3	1
603	2	62	0	1.56	58	1	23.8	4	0	0	1	0	140	98	0	0	0	1	0	1	0	0	1	1	1	0	1	1	0	0	0	1	0	1	0	1	0	0	0	0	1	0	0	1	0	0	0	2	0
605	1	70	0	1.63	42	1	15.8	4	0	0	1	0	141	80	0	0	0	1	0	1	0	0	0	3	3	0	1	1	0	0	0	1	0	1	0	1	0	0	0	0	1	0	0	1	0	0	0	2	0
606	1	66	0	1.63	55	1	20.7	4	0	0	1	0	164	89	0	0	0	0	0	1	0	0	0	3	3	0	1	0	1	0	0	1	0	1	1	1	1	1	0	0	1	0	1	1	0	0	0	2	0
607	1	69	0	1.58	59.9	1	24	1	1	0	0	0	152	78	0	1	1	0	0	1	1	0	0	3	2	0	1	1	0	0	0	1	0	1	0	1	0	0	0	0	1	1	0	1	0	0	0	2	0
608	1	65	0	1.63	62.9	0	23.7	4	0	0	1	0	138	80	0	0	0	0	0	1	0	0	0	3	3	1	1	1	0	0	0	1	0	0	0	1	0	0	0	0	1	0	0	1	0	0	0	3	0
609	1	51	0	1.65	60.2	0	22.1	4	0	0	1	0	134	70	0	0	1	1	0	1	0	0	0	1	3	0	1	1	0	0	0	0	1	0	1	1	0	0	0	0	0	1	0	1	0	0	0	2	0
610	1	80	1	1.68	68	0	24.1	3	0	0	0	1	126	76	0	1	0	0	0	1	0	0	0	1	2	0	1	1	0	0	0	1	0	1	1	1	0	0	0	0	1	0	0	1	0	0	0	1	0
611	1	78	1	1.63	51.5	1	19.4	1	1	0	0	0	120	80	0	1	0	0	0	0	0	0	0	1	1	0	1	0	1	0	0	1	0	1	0	1	0	0	0	0	0	0	0	1	0	0	0	3	0
612	2	81	1	1.44	51.4	1	24.8	1	1	0	0	0	130	78	0	1	1	0	0	1	0	0	0	1	1	1	1	1	0	0	0	1	0	1	0	1	0	0	0	0	1	1	0	1	0	0	0	1	0
616	1	70	0	1.68	NA	NA	NA	4	0	0	1	0	123	89	0	0	0	0	1	1	0	0	1	3	3	0	1	0	1	0	0	1	0	1	0	1	1	1	0	0	1	0	0	1	0	0	0	1	0
618	1	54	0	1.6	49.8	1	19.5	2	0	1	0	0	95	61	0	0	0	0	0	0	0	0	0	1	3	0	1	1	0	0	0	1	0	1	0	1	1	1	0	0	1	0	0	1	0	0	0	3	0
619	1	34	0	1.7	63.5	0	22	4	0	0	1	0	122	89	0	0	1	0	0	1	0	0	0	1	3	0	1	0	1	0	0	1	0	1	1	1	0	1	0	0	1	0	0	1	0	0	0	3	0
620	2	62	0	1.52	62.8	0	27.2	1	1	0	0	0	136	80	0	0	1	0	0	1	0	0	0	1	1	0	1	1	0	0	0	1	0	1	0	0	0	0	0	0	1	1	0	1	0	0	0	1	0
621	1	67	0	1.58	71.4	0	28.6	1	1	0	0	0	120	76	0	1	0	0	0	0	0	0	1	1	1	0	1	1	0	0	0	0	0	0	0	1	1	0	0	0	0	0	0	1	0	0	0	1	0
622	1	68	0	1.7	66.3	0	22.9	1	1	0	0	0	143	75	0	0	0	0	0	1	0	0	0	3	2	0	1	1	0	0	0	0	0	1	1	1	1	1	0	0	1	0	1	1	0	0	0	2	0
623	1	78	1	1.68	77	0	27.3	5	0	0	0	1	154	85	0	0	1	0	0	1	1	0	0	3	1	1	1	0	1	0	0	0	1	1	1	1	1	1	0	1	1	1	1	1	0	0	0	3	0
624	1	48	0	1.69	61	0	21.4	4	0	0	1	0	110	60	0	0	0	0	0	0	0	0	0	1	1	0	1	0	1	0	0	0	0	1	0	1	1	0	0	0	1	0	0	1	0	0	0	3	0
627	1	70	0	1.67	63.4	0	22.7	1	1	0	0	0	168	80	0	0	1	0	0	1	0	0	0	1	3	0	1	0	1	0	0	1	0	1	1	1	0	1	0	0	1	1	0	1	0	0	0	3	0
629	1	60	0	1.78	75	0	23.7	4	0	0	1	0	105	71	0	0	0	0	0	1	1	0	0	1	2	0	1	0	1	0	0	1	0	0	0	1	1	0	0	0	1	0	0	1	0	0	0	3	0
630	1	69	0	1.7	56	1	19.4	4	0	0	1	0	90	59	0	0	1	0	0	0	0	0	0	3	3	0	1	1	0	0	0	0	0	1	0	1	1	0	0	0	1	0	0	1	0	0	0	3	0
631	1	77	1	1.7	64	0	22.1	1	1	0	0	0	120	80	0	0	0	0	0	1	0	0	0	1	1	1	1	1	0	0	0	0	1	1	1	1	0	1	0	0	1	0	0	1	0	0	0	3	0
634	1	47	0	1.68	72.6	0	25.7	1	1	0	0	0	124	80	0	1	1	0	0	1	0	0	0	3	1	0	1	1	0	0	0	0	0	1	1	1	0	0	0	0	1	0	0	1	0	0	0	1	0
635	1	40	0	1.6	66.6	0	26	4	0	0	1	0	142	118	0	1	1	0	0	1	1	0	0	1	1	0	1	1	0	0	0	0	1	1	1	1	1	0	0	0	0	0	0	1	0	0	0	3	0
636	1	71	0	1.68	71	0	25.2	1	1	0	0	0	138	72	0	1	1	0	0	1	0	0	1	3	2	1	1	0	1	0	0	0	1	1	1	1	0	1	0	1	1	0	0	1	0	0	0	1	0
637	1	69	0	1.61	69	0	26.6	2	0	1	0	0	151	86	0	0	1	0	0	1	0	0	0	2	2	0	1	0	1	0	0	1	0	1	0	1	1	1	0	1	1	1	0	1	0	0	0	3	0
638	1	64	0	1.56	67.7	0	27.8	1	1	0	0	0	124	78	0	0	1	0	0	1	1	0	0	1	2	0	1	1	0	0	0	1	0	1	0	1	0	1	0	1	0	0	0	1	0	0	0	3	0
639	1	78	1	1.7	74.2	0	25.7	3	0	0	0	1	160	80	0	0	1	0	0	1	0	0	0	1	3	0	1	1	0	0	0	0	1	1	1	1	0	0	0	0	0	1	0	1	0	0	0	2	0
640	1	69	0	1.65	67	0	24.6	1	1	0	0	0	180	75	0	0	0	0	0	1	1	0	0	3	2	0	1	1	0	0	0	1	0	0	1	1	0	0	0	0	1	0	0	1	0	0	0	3	0
641	1	72	0	1.62	45	1	17.1	4	0	0	1	0	160	78	0	0	1	0	0	1	0	0	0	3	3	0	1	0	1	0	0	1	0	1	0	1	1	1	0	0	1	0	0	1	0	0	0	3	0
642	1	53	0	1.76	98	0	31.6	2	0	1	0	0	134	87	0	1	1	1	0	0	0	0	0	3	3	0	1	1	0	0	0	0	1	0	0	1	0	1	1	1	1	0	0	1	0	0	0	2	0
643	1	82	1	1.56	63.7	0	26.2	1	1	0	0	0	148	70	0	1	0	0	0	0	0	0	0	1	1	0	1	1	0	0	0	1	0	0	0	1	0	1	0	1	1	0	0	1	0	0	0	3	0
644	2	74	0	1.5	43.6	1	19.4	2	0	1	0	0	130	80	0	1	0	0	0	1	0	0	0	1	1	0	1	0	1	0	0	0	1	1	1	1	0	0	0	0	1	0	0	1	0	0	0	3	0
645	2	60	0	1.53	51.8	1	22.1	1	1	0	0	0	164	91	0	0	0	0	0	1	0	0	0	1	1	0	1	1	0	0	0	0	1	1	1	1	0	1	0	0	1	0	0	1	0	0	0	3	0
646	1	66	0	1.81	83.2	0	25.4	1	1	0	0	0	120	80	0	1	0	0	0	0	0	0	0	3	3	0	1	0	1	0	0	0	1	0	0	1	0	1	0	0	1	0	0	1	0	0	0	3	0
647	1	60	0	1.69	76	0	26.6	1	1	0	0	0	110	80	0	1	0	0	0	0	0	0	0	3	3	0	1	0	1	0	0	0	0	1	0	1	0	0	0	0	1	0	0	1	0	0	0	3	0
648	2	69	0	1.49	51	1	23	4	0	0	1	0	155	111	0	0	1	1	1	1	0	0	0	1	1	0	1	1	0	1	0	0	1	1	1	1	1	1	1	1	1	1	1	1	0	0	1	4	1
651	1	61	0	1.63	62	0	23.3	1	1	0	0	0	160	70	0	0	1	0	0	1	0	0	0	3	1	0	1	1	0	0	0	0	1	1	0	1	0	0	0	0	0	0	0	1	0	0	0	2	0
652	1	50	0	1.77	75	0	23.9	4	0	0	1	0	127	81	0	0	1	0	0	0	0	0	0	1	1	0	1	1	0	0	0	1	0	0	0	1	1	0	0	0	1	0	1	1	0	0	0	2	1
653	1	50	0	1.62	69	0	26.3	3	0	0	0	1	160	91	0	0	0	0	0	1	0	0	1	1	2	0	1	1	0	0	0	1	0	1	1	1	0	1	0	0	1	0	0	1	1	1	0	3	0
654	1	79	1	1.65	80	0	29.4	1	1	0	0	0	150	85	0	0	1	0	0	1	1	0	0	1	1	1	1	1	0	0	0	0	1	1	1	1	0	0	0	0	1	0	0	1	1	1	0	3	0
655	2	64	0	1.55	81	0	33.7	1	1	0	0	0	140	90	0	1	0	0	0	1	0	0	1	1	1	0	1	1	0	0	0	0	1	1	0	1	0	0	0	0	1	0	0	1	1	1	0	1	0
656	1	64	0	1.72	72.6	0	24.5	5	0	0	0	1	124	70	0	0	1	0	0	0	0	0	0	1	3	0	1	1	0	0	0	1	0	1	0	1	0	0	0	0	1	1	0	1	0	0	0	2	0
657	2	73	0	1.58	62	0	24.8	1	1	0	0	0	132	78	0	1	1	0	0	1	0	0	0	1	1	0	1	0	1	0	0	1	0	1	1	1	0	1	0	0	1	0	0	1	1	1	0	2	0
658	1	50	0	1.7	81	0	28	4	0	0	1	0	113	75	0	0	0	0	0	1	0	0	0	3	3	0	1	0	1	0	0	1	0	1	0	1	0	1	0	0	1	0	0	1	0	0	0	3	0
659	1	44	0	1.63	69	0	26	4	0	0	1	0	120	80		1	1	0	0	1	0	0	0	3	3	0	1	1	0	0	0	1	0	1	0	1	0	0	0	0	1	0	0	1	0	0	0	3	0
660	1	51	0	1.65	70	0	25.7	1	1	0	0	0	150	70	0	0	1	0	0	1	0	0	0	3	3	0	1	1	0	0	0	1	0	0	1	1	0	1	0	0	1	0	0	1	0	0	0	3	0
661	1	69	0	1.58	57.9	1	23.2	5	0	0	0	1	145	80	0	1	0	0	0	1	0	0	0	3	2	0	1	0	1	0	0	0	0	1	0	1	0	0	0	0	1	0	0	1	0	0	0	1	0
662	2	64	0	1.58	66.6	0	26.7	3	0	0	0	1	113	52	0	1	1	0	0	1	1	0	0	1	1	1	1	1	0	0	0	1	0	1	1	1	0	1	0	0	1	1	0	1	0	0	0	2	0
664	2	73	0	1.5	52	1	23.1	4	0	0	1	0	130	81	0	1	0	1	0	1	0	0	0	1	1	1	1	1	0	0	0	1	0	1	0	1	0	1	0	1	1	0	0	1	1	1	0	3	0
666	1	69	0	1.66	68	0	24.7	1	1	0	0	0	138	98	0	0	1	0	0	1	0	0	0	1	1	0	1	1	0	0	0	0	1	1	0	0	0	0	0	0	0	1	0	1	0	0	0	2	0
667	2	61	0	1.58	50	1	20	1	1	0	0	0	150	80	0	1	1	0	0	1	0	0	0	1	1	0	1	1	0	0	0	1	0	1	1	1	1	1	0	0	1	1	1	1	0	0	0	3	0
669	2	74	0	1.58	52	1	20.8	2	0	1	0	0	134	68	0	0	0	0	0	1	0	0	0	3	1	0	1	0	1	0	0	1	0	1	0	1	1	0	0	0	1	0	1	1	0	0	0	1	0
670	2	53	0	1.6	65	0	25.4	2	0	1	0	0	134	72	0	1	1	0	0	1	0	0	1	1	1	0	1	1	0	0	0	1	0	0	0	1	1	0	0	0	1	0	0	1	0	0	0	4	1
671	1	49	0	NA	NA	NA	NA	4	0	0	1	0	169	107	1	0	1	1	0	1	0	0	0	1	3	1	1	0	1	0	0	0	0	1	0	1	0	0	1	1	1	0	1	1	0	0	0	3	0
672	1	48	0	1.7	70.3	0	24.3	1	1	0	0	0	130	80	0	1	1	0	0	0	0	0	0	1	3	0	1	0	1	0	0	1	0	1	0	1	0	1	0	0	1	1	0	1	0	0	0	3	0
673	2	57	0	1.5	56.4	1	25.1	1	1	0	0	0	170	80	0	0	0	0	0	1	0	0	0	3	1	0	1	1	0	0	0	1	0	0	1	1	0	1	0	0	1	0	0	1	0	0	0	3	0
675	1	52	0	1.7	68	0	23.5	1	1	0	0	0	138	80	0	1	0	0	0	1	0	0	0	3	3	0	1	1	0	0	0	1	0	1	1	1	0	0	0	0	1	0	0	1	0	0	0	3	0
676	1	70	0	1.7	54	1	18.7	4	0	0	1	0	90	56	0	1	0	0	0	0	0	0	0	1	1	0	1	1	0	0	0	0	0	1	0	1	0	0	0	0	1	0	0	1	0	0	0	2	0
677	2	66	0	1.52	60	0	26	1	1	0	0	0	142	80	0	0	1	1	0	1	0	0	0	1	1	0	1	0	1	0	1	0	1	1	1	1	1	0	0	1	1	1	0	1	0	0	0	2	1
678	1	65	0	1.62	64	0	24.4	4	0	0	1	0	128	76	0	1	1	0	0	1	0	0	1	1	3	0	1	1	0	0	0	0	1	1	1	1	0	1	0	0	1	0	0	1	0	0	0	1	0
679	2	61	0	1.55	58.9	1	24.5	4	0	0	1	0	109	99	0	0	0	0	0	1	0	0	1	3	3	0	1	0	1	0	0	0	0	1	0	1	1	0	0	0	1	0	0	1	0	0	0	4	1
680	2	49	0	1.55	54.5	1	22.7	1	1	0	0	0	165	95	0	0	0	0	0	1	0	0	0	1	1	0	1	1	0	0	0	1	0	1	0	1	0	1	0	0	0	0	0	1	0	0	0	1	0
681	1	87	1	1.69	66.1	0	23.1	1	1	0	0	0	130	80	0	1	1	1	0	1	0	0	1	3	2	0	1	1	0	0	0	0	0	1	1	1	1	1	0	1	1	1	0	1	0	0	0	3	0
682	1	61	0	1.69	75	0	26.3	1	1	0	0	0	122	77	0	1	0	0	0	1	0	0	0	1	3	0	1	1	0	0	0	1	0	1	0	1	1	0	0	0	1	0	1	1	0	0	0	3	0
683	1	70	0	1.65	72.5	0	26.6	1	1	0	0	0	120	80	0	1	0	0	0	1	0	0	0	1	3	0	1	1	0	0	0	1	0	1	0	1	0	1	0	0	1	0	0	1	0	0	0	1	0
684	1	60	0	1.8	86.2	0	26.6	1	1	0	0	0	140	70	0	1	1	0	0	1	0	0	0	1	3	0	1	1	0	0	0	1	0	1	0	1	1	0	0	0	1	1	0	1	0	0	0	3	0
685	1	63	0	1.74	60.6	0	20	4	0	0	1	0	86	59	0	0	0	1	0	1	0	0	1	2	2	0	1	1	0	0	0	0	1	1	0	1	1	0	0	1	1	0	0	0	1	0	0	2	0
686	1	68	0	1.7	69.8	0	24.2	1	1	0	0	0	114	80	0	0	0	1	0	0	0	0	0	1	3	0	1	1	0	0	0	1	0	1	0	1	1	0	0	0	1	0	0	1	0	0	0	3	0
687	1	79	1	1.7	62.7	0	21.7	1	1	0	0	0	116	66	0	0	0	0	0	0	0	0	0	3	2	1	1	1	0	0	0	0	1	1	0	1	1	1	0	0	1	0	1	1	0	0	0	3	0
688	1	64	0	1.68	79.7	0	28.2	1	1	0	0	0	210	100	0	0	0	0	0	1	0	0	0	1	2	0	1	1	0	0	0	1	0	1	1	1	0	1	0	0	1	0	0	1	0	0	0	2	0
689	1	66	0	1.7	69	0	23.9	4	0	0	1	0	144	95	0	0	0	0	0	1	0	0	0	3	3	0	1	0	1	0	0	1	0	1	0	1	1	0	0	0	1	0	0	1	0	0	0	2	0
690	1	68	0	1.58	52.3	1	21	4	0	0	1	0	92	54	0	0	0	1	0	0	0	0	0	3	3	0	1	0	1	0	0	0	1	1	0	1	1	0	0	1	1	0	0	1	0	0	0	3	0
692	1	75	1	1.65	59.1	1	21.7	3	0	0	0	1	138	91	0	0	0	0	0	0	0	0	0	1	3	0	1	1	0	0	0	1	0	1	0	1	0	1	0	0	1	0	0	1	1	1	0	3	0
693	2	66	0	1.6	61.2	0	23.9	3	0	0	0	1	127	83	0	1	0	0	0	1	0	0	0	1	1	0	1	1	0	0	0	0	1	1	1	1	0	0	0	0	1	0	0	1	1	1	0	1	0
694	2	69	0	1.4	41	1	20.9	1	1	0	0	0	148	74	0	1	0	0	0	0	0	0	0	1	1	0	1	1	0	0	0	0	1	1	0	1	0	1	0	0	1	0	1	1	0	0	0	3	0
695	1	70	0	1.7	62	0	21.5	4	0	0	1	0	119	64	0	0	0	0	0	1	0	0	0	3	2	1	1	1	0	0	0	0	1	1	0	1	1	1	0	0	1	0	0	1	0	0	0	3	0
696	1	59	0	1.68	64	0	22.7	4	0	0	1	0	108	58	0	1	1	0	0	0	0	0	0	3	3	0	1	1	0	0	0	0	0	0	0	1	1	0	0	0	1	0	0	1	0	0	0	3	0
697	2	75	1	1.56	58.4	1	24	4	0	0	1	0	126	85	0	0	1	0	0	1	0	0	0	3	1	0	1	1	0	0	0	0	0	1	0	1	1	0	0	0	1	1	0	0	1	0	0	2	0
699	2	64	0	1.5	62	0	27.6	1	1	0	0	0	142	72	0	1	0	0	0	1	0	0	1	1	1	0	1	1	0	0	0	1	0	1	1	1	1	1	0	0	1	0	0	1	0	0	0	3	0
700	1	61	0	1.75	80	0	26.1	4	0	0	1	0	122	74	0	0	0	0	0	1	0	0	1	1	1	1	1	0	1	0	0	1	0	1	0	1	1	0	0	0	1	0	0	1	0	0	0	3	0
701	1	70	0	1.7	66	0	22.8	4	0	0	1	0	90	60	0	1	0	0	0	1	0	0	1	3	3	0	1	1	0	0	0	0	0	0	0	1	1	0	0	0	1	0	0	1	0	0	0	3	0
702	1	54	0	1.72	82	0	27.7	3	0	0	0	1	150	90	0	1	0	0	0	1	0	0	0	3	1	0	1	0	1	0	0	1	0	1	1	1	0	1	0	0	1	0	0	1	0	0	0	1	0
703	1	51	0	1.68	76	0	26.9	4	0	0	1	0	158	82	0	0	1	0	0	1	1	0	0	2	2	0	1	0	1	0	0	1	0	1	1	1	1	0	0	0	0	1	0	1	0	0	0	3	0
704	2	71	0	1.44	51	1	24.6	1	1	0	0	0	136	82	1	1	0	0	0	1	0	0	0	1	1	1	1	1	0	0	0	0	0	1	1	1	0	1	0	0	0	0	0	1	1	1	0	3	0
706	1	46	0	1.66	70.5	0	25.6	1	1	0	0	0	124	70	0	1	1	0	0	0	1	0	0	3	3	0	1	1	0	0	0	0	0	1	0	1	1	0	0	0	1	0	0	1	0	0	0	2	0
707	2	65	0	1.65	72.7	0	26.7	5	0	0	0	1	148	90	0	0	1	0	0	1	0	0	0	1	1	0	1	0	1	0	0	0	1	1	1	1	0	1	0	0	1	1	0	1	1	1	0	1	0
708	1	75	1	1.64	39	1	14.5	4	0	0	1	0	105	62	0	0	0	1	0	0	0	0	0	3	3	0	1	1	0	0	0	0	1	1	0	1	1	1	1	1	1	0	1	1	0	0	0	3	0
709	1	77	1	1.68	72.5	0	25.7	2	0	1	0	0	119	88	0	1	0	1	0	1	0	0	1	1	1	1	1	1	0	0	0	0	0	1	0	1	0	1	1	1	1	0	0	0	1	0	0	3	0
710	1	46	0	1.65	58.5	1	21.5	4	0	0	1	0	103	67	0	0	0	1	0	0	0	0	0	1	1	1	1	1	0	0	0	1	0	1	0	1	1	0	1	1	1	0	0	1	0	0	1	2	0
711	1	52	0	1.64	80	0	29.7	2	0	1	0	0	140	72	0	0	0	0	0	1	0	0	0	3	3	0	1	0	1	0	1	1	0	1	0	1	1	0	0	0	1	0	0	1	0	0	0	1	0
712	2	67	0	1.58	68	0	27.2	1	1	0	0	0	150	86	0	1	0	1	0	1	0	0	0	1	1	0	1	1	0	0	0	0	1	1	1	0	0	1	0	1	1	0	0	1	0	0	0	1	0
713	2	71	0	1.68	62	0	22	1	1	0	0	0	160	80	0	0	1	0	0	1	0	0	0	1	1	0	1	0	1	0	0	0	1	1	1	0	1	0	0	0	1	1	0	1	0	0	0	3	0
714	2	69	0	1.55	51.2	1	21.3	1	1	0	0	0	94	62	0	0	1	0	0	1	0	0	0	1	1	1	1	0	1	0	0	1	0	1	1	1	0	0	0	0	1	0	0	0	1	0	0	2	0
715	1	66	0	1.7	NA	NA	NA	4	0	0	1	0	146	81	0	0	1	1	0	1	0	0	0	3	2	1	1	1	0	0	0	1	0	1	1	1	1	1	0	1	1	1	0	1	1	1	0	4	1
716	1	54	0	1.75	85	0	27.8	2	0	1	0	0	119	76	0	0	1	0	0	0	0	0	0	1	3	0	1	0	1	0	0	1	0	1	0	1	0	1	0	0	1	0	0	1	0	0	0	3	0
717	1	60	0	1.7	58	1	20.1	2	0	1	0	0	106	62	0	0	0	1	0	0	0	0	0	1	3	1	1	1	0	0	0	1	0	0	0	1	1	0	0	0	1	0	0	1	0	0	0	3	0
718	1	78	1	1.72	75	0	25.4	4	0	0	1	0	112	56	0	0	0	1	1	1	0	0	0	1	1	0	1	0	1	0	0	1	0	1	0	1	1	1	0	1	1	0	1	1	0	0	0	3	0
719	2	70	0	1.54	40	1	16.9	4	0	0	1	0	98	74	0	0	1	1	0	0	0	0	0	3	3	0	1	0	1	0	0	0	0	1	0	1	1	1	1	1	1	0	1	0	1	0	1	2	0
720	2	77	1	1.56	48.5	1	19.9	2	0	1	0	0	140	65	0	0	1	0	0	1	0	0	0	3	3	0	1	1	0	0	0	1	0	1	0	1	1	1	0	0	1	0	0	0	1	0	0	3	0
721	1	51	0	1.72	73	0	24.7	2	0	1	0	0	102	63	0	1	0	1	0	1	0	0	1	1	1	1	1	0	1	0	0	1	0	0	0	1	1	0	0	1	1	0	0	1	0	0	0	3	1
722	2	69	0	1.55	60	0	25	1	1	0	0	0	180	80	0	1	1	0	0	1	0	0	0	1	1	1	1	1	0	0	0	0	1	1	1	1	0	0	0	0	0	1	0	0	1	0	0	2	0
724	1	75	1	1.7	73	0	25.3	2	0	1	0	0	137	79	0	0	1	0	0	1	0	0	0	1	1	0	1	1	0	0	0	1	0	0	1	1	1	0	0	0	0	1	0	0	1	0	0	3	0
725	2	65	0	1.5	44	1	19.6	1	1	0	0	0	172	94	0	0	0	1	0	1	0	0	0	1	1	0	1	0	1	0	0	1	0	1	1	1	1	0	1	1	1	0	0	1	0	0	0	3	0
726	2	60	0	1.6	60.9	0	23.8	3	0	0	0	1	106	64	0	0	1	0	0	0	0	0	0	1	1	0	1	1	0	0	0	1	0	1	0	1	0	0	0	0	0	1	0	0	1	0	0	3	0
727	1	82	1	1.56	60	0	24.7	4	0	0	1	0	95	71	0	0	1	1	0	1	0	0	1	1	1	1	1	1	0	0	0	0	0	0	0	1	1	0	0	1	1	0	0	0	1	0	0	2	0
728	2	72	0	1.58	48.5	1	19.4	1	1	0	0	0	124	60	0	1	1	0	0	1	0	0	0	1	1	0	1	1	0	0	0	0	0	0	1	1	0	1	0	0	1	0	0	0	1	0	0	2	0
730	1	67	0	1.68	70	0	24.8	1	1	0	0	0	136	84	0	0	1	0	0	1	1	0	0	1	2	0	1	1	0	0	0	1	0	1	0	1	1	1	0	0	1	1	1	1	0	0	0	3	1
731	1	64	0	1.7	61	0	21.1	1	1	0	0	0	120	80	0	1	0	0	0	0	0	0	1	1	1	0	1	0	1	0	0	0	0	0	0	1	0	0	0	0	0	0	0	0	1	0	0	2	1
732	2	59	0	1.54	53	1	22.3	1	1	0	0	0	120	80	0	1	1	0	0	1	0	0	0	1	1	0	1	0	1	0	0	0	0	1	1	1	0	1	0	0	1	0	0	1	0	0	0	1	0
733	1	53	0	1.7	70	0	24.2	2	0	1	0	0	189	110	0	0	1	1	0	1	0	0	0	1	1	0	1	1	0	0	0	1	0	1	0	1	1	1	1	1	1	1	1	1	0	0	0	3	0
734	1	52	0	1.7	70	0	24.2	4	0	0	1	0	96	53	0	0	1	1	0	0	0	0	0	1	1	1	1	1	0	0	0	0	0	0	0	1	1	0	0	0	1	0	0	0	1	0	0	3	0
735	1	69	0	1.59	64.5	0	25.5	1	1	0	0	0	170	75	0	1	0	0	0	1	0	0	0	2	2	0	1	1	0	0	0	0	1	1	1	1	0	1	0	0	1	0	1	1	0	0	0	4	1
736	2	59	0	1.52	65	0	28.1	1	1	0	0	0	120	80	0	1	1	0	0	1	0	0	0	3	3	0	1	1	0	0	0	1	0	1	0	1	0	1	0	0	1	1	0	1	0	0	0	2	0
737	1	81	1	1.56	60	0	24.7	1	1	0	0	0	190	90	0	0	0	0	0	1	0	0	0	1	2	0	1	0	1	0	0	1	0	1	1	1	0	1	0	0	1	0	1	0	1	0	0	3	0
738	1	81	1	1.7	NA	NA	NA	1	1	0	0	0	156	76	0	0	0	0	0	1	0	0	0	1	1	0	1	1	0	0	0	1	0	1	0	1	1	1	0	1	1	0	0	0	1	0	0	2	0
739	1	76	1	1.72	62.5	0	21.1	1	1	0	0	0	118	72	0	0	1	0	0	0	0	0	0	3	2	0	1	1	0	0	0	0	1	0	0	1	0	1	0	0	1	1	0	0	1	0	0	2	0
741	2	70	0	1.65	60	0	22	4	0	0	1	0	120	80	0	0	0	0	0	1	0	0	0	1	1	0	1	1	0	0	0	1	0	0	0	1	1	0	0	0	1	0	0	0	1	0	0	3	0
742	1	45	0	1.64	66	0	24.5	2	0	1	0	0	98	65	0	0	0	0	0	0	0	0	0	1	1	0	1	0	1	0	0	0	0	0	0	1	1	0	0	0	1	0	0	1	0	0	0	3	0
744	2	79	1	1.62	57.1	1	21.8	2	0	1	0	0	110	83	0	1	1	0	0	1	1	0	1	1	1	0	1	1	0	0	0	0	0	1	1	1	0	0	0	0	1	0	0	0	1	0	0	3	0
745	2	76	1	1.58	54	1	21.6	4	0	0	1	0	106	68	0	0	0	0	0	1	0	0	0	1	1	0	1	0	1	0	0	0	0	0	0	1	0	0	0	0	1	0	0	0	1	0	0	3	0
747	1	68	0	1.7	83	0	28.7	1	1	0	0	0	128	78	0	0	1	0	0	1	0	0	0	1	2	0	1	1	0	0	0	1	0	1	0	1	0	1	0	0	1	0	0	0	1	0	0	2	0
748	1	61	0	1.65	63.5	0	23.3	1	1	0	0	0	130	80	0	1	0	0	0	1	0	0	0	1	2	0	1	1	0	0	0	1	0	1	1	1	0	0	0	0	1	0	0	0	1	0	0	4	1
749	1	71	0	1.6	65	0	25.4	5	0	0	0	1	164	102	0	0	0	1	0	1	0	0	0	1	2	1	1	1	0	0	0	0	1	0	1	1	0	1	0	0	1	0	0	0	1	0	0	1	0
750	1	79	1	1.64	70.3	0	26.1	1	1	0	0	0	149	72	0	1	1	0	0	1	0	0	0	1	1	0	1	1	0	0	0	1	0	1	1	1	0	0	0	0	0	1	0	0	1	0	0	3	0
751	1	82	1	1.7	55.5	1	19.2	4	0	0	1	0	110	70	0	0	0	0	0	1	0	0	1	1	1	0	1	1	0	0	0	0	0	0	0	1	1	0	0	0	1	0	0	0	1	0	0	3	0
752	1	75	1	1.64	50	1	18.6	2	0	1	0	0	129	70	0	0	0	0	0	1	0	0	0	3	3	0	1	1	0	0	0	0	0	0	0	1	1	0	0	0	1	0	0	0	1	0	0	2	0
753	1	66	0	1.56	59	1	24.2	1	1	0	0	0	142	75	0	1	1	0	0	1	0	0	1	1	1	0	1	1	0	0	0	0	1	1	0	1	1	1	0	0	1	1	0	1	0	0	0	3	0
754	1	63	0	1.66	64.9	0	23.6	4	0	0	1	0	120	90	0	0	1	0	0	1	0	0	0	3	3	0	1	1	0	0	0	1	0	1	0	1	0	0	0	0	1	1	0	0	1	0	0	2	0
755	1	75	1	1.65	65.9	0	24.2	1	1	0	0	0	180	98	0	1	1	0	0	1	1	0	1	1	2	0	1	1	0	0	0	0	1	1	1	1	0	1	0	0	1	0	0	0	1	0	0	3	0
756	1	69	0	1.6	55	1	21.5	2	0	1	0	0	114	68	0	0	1	0	0	0	0	0	0	3	3	0	1	1	0	0	0	1	0	0	0	1	1	1	1	1	1	0	1	0	1	0	0	3	0
757	2	72	0	1.65	54	1	19.8	4	0	0	1	0	176	92	0	1	1	0	0	1	0	0	1	1	1	0	1	0	1	0	0	0	1	1	0	1	1	0	0	0	1	1	0	0	1	0	0	1	0
759	1	58	0	1.69	65	0	22.8	1	1	0	0	0	150	98	0	1	0	0	0	1	0	0	0	1	1	0	1	1	0	0	0	1	0	1	1	1	0	0	0	0	1	0	0	1	0	0	0	1	0
760	1	76	1	1.68	65	0	23	5	0	0	0	1	170	80	1	1	0	1	0	1	0	0	1	1	1	1	1	1	0	0	0	1	0	0	1	1	0	1	1	1	0	0	0	0	1	0	0	3	0
761	1	58	0	1.62	72	0	27.4	4	0	0	1	0	91	61	0	0	1	0	0	1	0	0	0	3	3	0	1	0	1	0	0	1	0	1	0	1	1	0	0	0	0	0	0	1	0	0	0	2	0
762	2	70	0	1.56	61	0	25.1	1	1	0	0	0	110	70	0	0	0	0	0	1	0	0	0	1	1	1	1	1	0	0	0	1	0	1	0	1	0	0	0	0	1	0	0	1	0	0	0	3	0
764	2	64	0	1.47	52.4	1	24.2	5	0	0	0	1	110	50	0	1	1	1	0	1	1	0	0	1	1	0	1	0	1	0	1	0	1	1	1	0	1	0	0	1	1	1	0	0	1	0	0	3	0
765	1	50	0	1.68	62	0	22	2	0	1	0	0	91	49	0	0	0	0	0	0	0	0	0	1	1	0	1	0	1	0	0	1	0	0	0	1	1	0	0	0	1	0	0	1	0	0	0	3	0
766	1	77	1	1.72	61.5	0	20.8	1	1	0	0	0	146	74	0	0	1	0	0	1	0	0	0	3	3	1	1	0	1	0	0	0	1	0	0	1	1	1	0	0	1	0	0	0	1	0	0	3	0
767	1	56	0	1.65	72	0	26.4	1	1	0	0	0	140	100	0	0	0	0	0	1	0	0	0	1	1	0	1	1	0	0	0	1	0	1	0	1	0	0	0	0	1	0	0	1	0	0	0	2	0
768	2	74	0	1.65	50	1	18.4	1	1	0	0	0	140	72	0	1	1	0	0	1	0	0	1	1	1	1	1	1	0	0	0	1	0	0	0	1	0	0	0	0	1	1	0	0	1	0	0	1	0
770	1	62	0	1.7	73.4	0	25.4	4	0	0	1	0	128	87	0	1	0	0	0	0	1	0	0	1	1	0	1	0	1	0	0	1	0	1	0	1	1	0	0	0	0	0	0	0	1	0	0	2	1
771	2	51	0	1.53	59.1	1	25.3	1	1	0	0	0	106	70	0	0	0	0	0	0	0	0	0	3	1	0	1	1	0	0	0	1	0	1	0	1	0	0	0	0	1	0	0	0	1	0	0	1	0
772	1	50	0	1.65	72.1	0	26.5	1	1	0	0	0	176	96	0	1	0	0	0	1	0	0	0	3	3	0	1	1	0	0	0	1	0	1	1	1	1	1	0	0	0	1	0	0	1	0	0	2	0
773	1	65	0	1.53	54.6	1	23.3	1	1	0	0	0	150	80	0	1	0	0	0	1	1	0	0	1	2	0	1	0	1	0	0	1	0	1	1	1	0	1	0	0	1	0	0	0	1	0	0	3	0
774	1	63	0	1.71	73.6	0	25.2	2	0	1	0	0	122	88	0	0	0	0	0	1	0	0	0	3	3	0	1	1	0	0	0	1	0	1	1	1	1	0	0	0	1	0	0	0	1	0	0	3	0
775	1	65	0	1.65	74	0	27.2	3	0	0	0	1	135	78	0	1	0	0	0	1	0	0	0	3	3	0	1	1	0	0	0	0	0	1	1	1	0	1	0	0	0	0	0	1	0	0	0	2	0
776	1	62	0	1.66	54	1	19.6	4	0	0	1	0	128	72	0	0	1	1	0	0	0	0	0	3	3	0	1	0	1	0	0	0	0	1	0	1	1	1	1	1	1	0	1	0	1	0	0	3	0
778	1	74	0	1.6	62.3	0	24.3	1	1	0	0	0	120	80	0	1	0	0	0	1	0	0	0	1	1	0	1	1	0	0	0	1	0	0	1	1	0	1	0	0	1	0	0	0	1	0	0	1	0
779	2	63	0	1.55	61.7	0	25.7	1	1	0	0	0	130	80	0	0	1	0	0	0	0	0	0	1	1	0	1	1	0	0	0	0	0	1	0	1	0	0	0	0	1	1	1	0	1	0	0	3	0
780	2	73	0	1.5	48	1	21.3	4	0	0	1	0	137	76	0	0	1	1	0	1	0	0	0	1	1	0	1	0	1	0	0	1	0	1	0	1	1	1	0	1	1	1	0	0	1	0	0	3	0
781	1	53	0	1.72	68	0	23	4	0	0	1	0	145	95	0	1	1	1	0	1	0	0	1	3	3	1	1	0	1	0	0	1	0	0	1	1	0	1	1	1	1	0	0	0	1	0	0	3	0
782	1	53	0	1.71	69	0	23.6	2	0	1	0	0	138	75	0	0	0	0	0	1	0	0	0	3	3	0	1	0	1	0	0	1	0	1	0	1	1	1	0	0	1	0	0	1	0	0	0	3	0
783	1	66	0	1.7	62	0	21.5	4	0	0	1	0	95	60	0	0	0	0	0	1	0	0	0	1	3	0	1	0	1	0	0	0	0	0	0	1	1	0	0	0	1	0	0	1	0	0	0	3	0
784	1	53	0	1.66	60	0	21.8	4	0	0	1	0	127	72	0	0	0	0	0	1	0	0	0	3	3	0	1	0	1	0	0	0	0	1	0	1	1	1	0	0	1	0	0	0	1	0	0	1	0
785	1	49	0	1.62	68	0	25.9	4	0	0	1	0	91	51	0	0	1	0	0	0	0	0	0	3	3	0	1	1	0	0	0	1	0	0	0	1	0	0	0	0	1	0	0	0	1	0	0	3	0
786	2	72	0	1.57	55.3	1	22.4	1	1	0	0	0	150	70	0	0	0	0	0	1	0	0	0	1	1	0	1	1	0	0	0	1	0	1	0	1	0	1	0	0	1	0	0	0	1	0	0	2	0
787	1	66	0	1.71	76	0	26	4	0	0	1	0	137	80	1	0	1	0	0	1	0	0	0	3	3	0	1	0	1	0	0	1	0	1	1	1	1	1	0	0	1	1	0	1	0	0	0	3	0
788	1	83	1	1.72	66.3	0	22.4	5	0	0	0	1	148	68	1	1	1	1	0	1	0	0	0	1	3	1	1	1	0	0	0	0	1	1	0	1	0	1	0	0	1	0	0	0	1	0	0	3	0
790	1	54	0	1.7	57.6	1	19.9	4	0	0	1	0	93	54	0	0	0	0	0	0	0	0	0	1	3	0	1	1	0	0	0	0	0	1	0	1	1	1	0	0	1	0	0	0	1	0	0	2	0
794	2	66	0	1.5	50	1	22.2	1	1	0	0	0	154	90	0	0	0	0	0	1	0	0	0	1	1	0	1	1	0	0	0	1	0	1	1	1	1	0	0	0	1	0	0	1	0	0	0	2	0
795	1	77	1	1.68	42	1	14.9	2	0	1	0	0	105	50	0	0	0	0	0	0	0	0	0	3	3	0	1	0	1	0	0	0	0	0	0	1	0	0	0	0	1	0	0	0	1	0	0	2	0
797	1	41	0	1.69	72	0	25.2	4	0	0	1	0	124	72	0	0	0	0	0	1	0	0	0	3	3	0	1	0	1	0	0	1	0	1	0	1	1	0	0	0	1	0	0	1	0	0	0	3	0
798	1	66	0	1.63	59	1	22.2	4	0	0	1	0	128	88	0	1	0	0	0	0	0	0	0	3	3	0	1	0	1	0	0	1	0	1	0	1	1	0	0	0	1	0	0	1	0	0	0	1	0
799	1	55	0	1.7	83	0	28.7	2	0	1	0	0	134	92	0	1	0	1	0	0	0	0	0	3	3	0	1	1	0	0	0	1	0	1	0	1	0	1	1	1	1	0	1	0	1	0	0	2	0
800	1	69	0	1.65	51.9	1	19.1	1	1	0	0	0	140	62	0	0	0	0	0	1	0	0	0	1	1	1	1	1	0	0	0	1	0	1	1	1	1	1	0	0	1	0	0	0	1	0	0	3	0
801	1	66	0	1.65	83	0	30.5	1	1	0	0	0	160	80	0	0	1	0	0	1	0	0	0	1	1	0	1	1	0	0	0	0	1	1	1	1	0	0	0	0	1	0	0	0	1	0	0	3	0
802	2	60	0	1.5	63.5	0	28.2	1	1	0	0	0	118	78	0	1	1	0	0	1	1	0	0	1	1	0	1	1	0	0	0	1	0	1	1	1	0	0	0	0	0	1	0	0	1	0	0	3	0
803	2	66	0	1.56	57	1	23.4	2	0	1	0	0	143	94	0	1	1	0	0	1	1	0	0	1	1	0	1	1	0	0	0	0	1	1	0	1	0	1	0	0	1	0	0	0	1	0	0	1	0
804	1	48	0	1.7	57	1	19.7	2	0	1	0	0	96	70	0	0	0	0	0	0	0	0	0	3	1	0	1	0	1	0	0	1	0	1	0	1	1	0	0	0	1	0	0	1	0	0	0	2	0
805	2	49	0	1.63	55	1	20.7	4	0	0	1	0	132	76	0	0	0	0	0	0	0	0	0	1	1	0	1	0	1	0	0	1	0	1	0	1	0	1	0	0	1	0	1	1	0	0	0	1	0
806	1	48	0	1.67	68	0	24.4	4	0	0	1	0	96	64	0	1	0	0	0	0	0	0	0	1	3	0	1	1	0	0	0	0	0	1	0	1	1	0	0	0	1	0	1	1	0	0	0	4	1
807	1	70	0	1.69	85	0	29.8	4	0	0	1	0	149	102	0	0	1	0	0	1	0	0	0	1	1	0	1	1	0	0	0	0	0	1	0	0	1	1	0	0	1	1	0	1	0	0	0	3	0
808	1	53	0	1.7	67	0	23.2	1	1	0	0	0	118	74	0	0	0	0	0	0	0	0	0	3	3	0	1	1	0	0	0	1	0	1	0	1	1	0	0	0	1	0	0	0	1	0	0	2	0
809	2	66	0	1.55	55	1	22.9	4	0	0	1	0	120	80	0	1	1	0	0	1	0	0	0	1	1	1	1	1	0	0	0	1	0	1	0	1	1	1	0	0	1	1	0	0	1	0	0	3	0
810	1	83	1	1.78	64.5	0	20.4	2	0	1	0	0	120	80	0	1	1	0	0	0	0	0	0	1	2	0	1	1	0	0	0	0	0	1	0	1	1	0	0	0	1	0	0	0	1	0	0	3	1
812	1	63	0	1.7	77	0	26.6	2	0	1	0	0	141	72	0	0	1	0	0	1	0	0	0	3	2	1	1	1	0	0	0	1	0	1	0	1	0	0	0	0	1	0	0	0	1	0	0	1	0
813	1	69	0	1.72	89	0	30.1	1	1	0	0	0	174	104	0	0	0	0	0	1	0	0	0	1	1	0	1	1	0	0	0	0	1	1	1	1	0	0	0	0	1	0	0	0	1	0	0	3	0
815	1	80	1	1.6	49.7	1	19.4	5	0	0	0	1	120	80	0	0	0	0	0	1	0	0	0	3	3	1	1	1	0	0	0	0	1	1	0	1	0	1	0	0	1	1	0	0	1	0	0	2	0
816	1	59	0	1.72	76	0	25.7	1	1	0	0	0	130	80	0	0	1	0	0	0	0	0	0	3	3	0	1	0	1	0	0	1	0	1	0	1	0	0	0	0	0	0	0	0	1	0	0	3	0
817	1	61	0	1.72	77.2	0	26.1	1	1	0	0	0	149	72	0	1	0	0	0	1	0	0	0	3	3	0	1	1	0	0	0	1	0	1	0	1	0	0	0	0	0	0	0	0	1	0	0	1	0
818	1	53	0	1.75	61.1	0	20	4	0	0	1	0	120	62	0	0	1	0	0	1	0	0	0	3	3	0	1	0	1	0	0	0	0	1	1	1	1	0	0	0	1	0	0	1	0	0	0	2	0
819	1	53	0	1.72	75	0	25.4	4	0	0	1	0	114	68	0	1	0	1	0	1	0	0	0	3	3	0	1	0	1	0	1	0	0	1	0	1	1	1	1	1	1	0	1	1	0	0	0	3	0
820	1	61	0	1.65	71	0	26.1	1	1	0	0	0	130	90	0	1	0	0	0	1	0	0	0	3	3	0	1	1	0	0	0	1	0	1	0	1	0	1	0	0	0	0	0	1	0	0	0	1	0
821	1	64	0	1.64	72.6	0	27	1	1	0	0	0	160	80	0	0	1	0	0	0	1	0	0	1	3	0	1	1	0	0	0	1	0	1	0	1	1	0	0	0	0	1	0	0	1	0	0	3	0
822	1	53	0	1.6	63	0	24.6	2	0	1	0	0	122	76	0	1	0	0	0	0	0	0	0	1	3	0	1	0	1	0	0	1	0	1	0	1	1	0	0	0	1	0	1	1	0	0	0	4	1
823	1	74	0	1.65	66	0	24.2	2	0	1	0	0	167	80	1	1	1	1	0	1	0	0	1	1	1	0	1	0	1	0	0	0	0	0	0	1	0	1	1	1	1	1	1	1	0	0	0	3	0
824	2	69	0	1.58	50	1	20	1	1	0	0	0	168	64	0	1	1	0	0	1	0	0	0	1	1	1	1	1	0	0	0	0	0	0	1	1	0	0	0	0	0	0	0	1	0	0	0	1	0
825	1	57	0	1.68	70	0	24.8	4	0	0	1	0	165	84	0	0	1	1	0	0	0	0	0	3	3	0	1	1	0	0	0	1	0	1	0	1	0	1	0	1	1	1	0	1	0	0	0	3	0
826	2	59	0	1.51	53.8	1	23.6	1	1	0	0	0	178	100	0	0	0	0	0	1	0	0	0	1	1	1	1	0	1	0	0	1	0	0	1	1	0	1	0	0	1	0	0	1	0	0	0	2	0
827	1	73	0	1.65	76	0	27.9	5	0	0	0	1	165	94	1	1	1	1	0	1	0	0	0	1	1	0	1	1	0	0	0	1	0	1	1	1	0	1	0	1	0	1	0	0	1	0	0	3	0
828	2	74	0	1.48	47.8	1	21.8	1	1	0	0	0	151	64	0	0	1	0	0	1	1	0	0	1	1	0	1	1	0	0	0	1	0	1	1	1	1	1	0	0	1	0	1	0	1	0	0	3	0
829	1	74	0	1.71	60	0	20.5	2	0	1	0	0	148	62	0	0	0	1	0	1	0	0	0	1	1	1	1	0	1	0	0	1	0	0	0	1	1	1	0	1	1	0	0	0	1	0	0	3	0
830	1	66	0	1.66	68.4	0	24.8	1	1	0	0	0	118	68	0	0	1	0	0	1	1	0	0	2	2	0	1	1	0	0	0	1	0	1	0	1	0	0	0	0	1	0	0	0	1	0	0	3	0
831	1	75	1	1.64	60	0	22.3	1	1	0	0	0	108	72	0	1	0	0	0	0	1	0	1	2	2	0	1	1	0	0	0	0	0	0	0	1	0	1	0	0	1	0	0	0	1	0	0	3	0
832	1	64	0	1.72	64	0	21.6	4	0	0	1	0	140	79	0	1	0	1	0	1	0	0	0	1	1	1	1	1	0	0	0	1	0	0	0	1	0	0	0	1	1	0	0	0	1	0	0	3	0
833	1	61	0	1.7	NA	NA	NA	4	0	0	1	0	147	86	0	0	0	0	0	1	0	0	0	3	1	0	1	1	0	0	0	1	0	0	0	1	1	0	0	0	1	0	0	1	0	0	0	3	0
834	1	68	0	1.65	55	1	20.2	4	0	0	1	0	136	74	0	0	0	1	0	0	0	0	0	3	3	0	1	0	1	0	1	0	0	0	0	1	1	0	1	1	1	0	0	1	0	0	0	2	0
835	1	71	0	1.65	70	0	25.7	4	0	0	1	0	140	84	0	1	0	1	0	1	0	0	1	3	3	0	1	0	1	0	0	1	0	1	1	1	1	1	0	1	1	0	0	1	0	0	0	4	1
836	1	52	0	1.76	86	0	27.8	4	0	0	1	0	152	81	0	1	1	0	0	1	0	0	0	3	1	0	1	1	0	0	0	1	0	0	1	1	1	0	0	0	1	0	1	1	0	0	0	1	0
837	1	53	0	1.68	70	0	24.8	4	0	0	1	0	100	69	0	0	0	1	0	1	0	0	0	3	3	0	1	0	1	0	0	0	0	1	0	1	1	0	0	1	1	0	1	1	0	0	0	1	0
839	1	57	0	1.52	57	1	24.7	1	1	0	0	0	121	80	0	0	0	0	0	0	0	0	0	1	1	0	1	1	0	0	0	1	0	1	0	1	0	0	0	0	1	0	0	0	1	0	0	3	0
840	2	65	0	1.5	56.5	1	25.1	3	0	0	0	1	135	75	0	0	1	0	0	1	0	0	0	1	1	0	1	1	0	0	0	1	0	0	0	1	0	1	0	0	1	1	0	0	1	0	0	2	0
841	2	66	0	1.48	45.5	1	20.8	5	0	0	0	1	108	63	0	0	0	0	0	0	1	0	0	1	2	0	1	0	1	0	0	0	0	1	0	1	0	0	0	0	1	0	0	0	1	0	0	2	0
842	1	63	0	1.7	72	0	24.9	4	0	0	1	0	131	83	0	1	1	1	0	0	0	0	1	3	3	0	1	0	1	0	0	1	0	1	0	1	0	1	0	1	1	1	0	0	1	0	0	3	0
843	1	69	0	1.62	73.2	0	27.9	2	0	1	0	0	140	90	0	0	0	0	0	1	0	0	0	1	3	0	1	1	0	0	0	1	0	0	0	1	0	1	0	0	1	0	0	0	1	0	0	3	0
844	1	47	0	1.77	74	0	23.6	4	0	0	1	0	100	68	0	0	1	1	0	0	0	0	1	3	3	0	1	0	1	0	0	0	0	0	0	1	0	0	1	1	1	0	0	1	0	0	0	3	0
845	1	71	0	1.55	58	1	24.1	1	1	0	0	0	148	73	0	1	0	1	0	0	0	0	0	1	2	0	1	1	0	0	0	1	0	1	0	1	0	1	1	1	0	0	0	0	1	0	0	1	0
846	2	70	0	1.55	49	1	20.4	4	0	0	1	0	113	49	0	0	1	0	0	0	0	0	1	1	1	0	1	0	1	0	0	1	0	1	0	1	0	0	0	0	1	0	0	1	0	0	0	3	0
847	1	75	1	1.71	68	0	23.3	5	0	0	0	1	140	70	0	0	0	1	0	1	0	0	0	3	3	1	1	1	0	0	0	1	0	1	0	1	0	0	1	1	0	0	0	1	0	0	0	2	0
848	1	75	1	1.4	58	1	29.6	1	1	0	0	0	168	86	0	0	0	0	0	1	0	0	1	1	1	0	1	1	0	0	0	1	0	1	1	1	0	1	0	0	1	0	0	0	1	0	0	3	0
849	2	73	0	1.55	51	1	21.2	4	0	0	1	0	97	60	0	0	1	0	0	1	0	0	0	1	1	0	1	0	1	0	0	1	0	1	0	1	1	1	0	0	1	0	1	1	0	0	0	2	0
850	1	67	0	1.65	72.5	0	26.6	2	0	1	0	0	116	60	0	1	0	0	0	0	0	0	0	3	3	0	1	0	1	0	0	1	0	1	0	1	1	0	0	0	1	0	0	0	1	0	0	3	0
851	1	70	0	1.68	71	0	25.2	1	1	0	0	0	120	63	0	1	0	0	0	1	0	0	0	3	2	1	1	1	0	0	0	1	0	1	0	1	0	0	0	0	0	0	0	0	1	0	0	1	0
852	2	72	0	1.42	52.5	1	26	2	0	1	0	0	156	80	0	0	0	0	0	1	0	0	0	1	1	0	1	0	1	0	0	1	0	1	1	1	0	1	0	0	1	0	0	0	1	0	0	3	0
853	1	71	0	1.6	64.4	0	25.2	1	1	0	0	0	146	80	0	1	0	0	0	0	0	0	0	1	1	NA	1	1	0	0	0	1	0	0	0	1	0	0	0	0	0	0	0	0	1	0	0	3	0
854	1	84	1	1.72	64	0	21.6	2	0	1	0	0	140	53	0	0	0	0	0	1	0	0	0	2	2	0	1	0	1	0	0	1	0	1	0	1	0	0	0	0	1	0	0	1	0	0	0	2	0
855	1	58	0	1.68	65	0	23	1	1	0	0	0	130	70	0	1	0	0	0	0	0	0	0	2	3	0	1	1	0	0	0	1	0	1	0	1	0	0	0	0	0	0	0	1	0	0	0	3	0
856	1	64	0	1.74	75	0	24.8	4	0	0	1	0	116	92	0	0	1	0	0	0	1	0	0	3	2	0	1	0	1	0	0	1	0	1	0	1	1	1	0	0	1	0	0	1	0	0	0	3	0
857	2	68	0	1.55	60.5	0	25.2	1	1	0	0	0	160	78	0	1	0	0	0	1	0	0	0	1	1	0	1	0	1	0	0	1	0	1	1	1	0	1	0	0	1	0	0	0	1	0	0	4	1
858	1	60	0	1.64	70	0	26	2	0	1	0	0	112	69	0	0	1	0	0	1	0	0	0	3	2	0	1	0	1	0	0	0	0	1	0	1	1	1	0	1	1	1	0	1	0	0	0	3	1
859	2	78	1	1.6	NA	NA	NA	1	1	0	0	0	129	64	0	0	1	1	0	1	0	0	0	1	1	0	1	1	0	1	0	1	0	0	1	1	0	1	1	1	1	1	1	1	0	0	0	2	0
860	1	53	0	1.6	68	0	26.6	1	1	0	0	0	153	90	0	0	0	1	0	1	0	0	0	1	3	0	1	0	1	0	0	1	0	1	0	1	0	1	0	1	1	0	1	0	1	0	0	3	0
861	2	67	0	1.58	64.4	0	25.8	3	0	0	0	1	122	78	1	0	0	0	0	1	0	0	0	1	1	0	1	1	0	0	0	1	0	1	1	1	0	0	0	0	1	0	0	0	1	0	0	3	0
862	2	75	1	1.5	50	1	22.2	1	1	0	0	0	122	62	0	1	0	0	0	1	0	0	0	1	1	0	1	1	0	0	0	1	0	1	1	1	0	1	0	0	0	0	0	0	1	0	0	2	0
863	2	62	0	1.55	47.5	1	19.8	1	1	0	0	0	164	98	0	0	0	0	0	1	0	0	0	1	1	0	1	0	1	0	0	1	0	1	1	1	0	1	0	0	1	0	0	0	1	0	0	1	0
864	1	66	0	1.69	72	0	25.2	2	0	1	0	0	110	70	0	0	1	0	0	1	0	0	0	3	2	0	1	0	1	0	0	1	0	1	0	1	0	0	0	0	0	1	0	0	1	0	0	1	0
865	1	50	0	1.68	76	0	26.9	5	0	0	0	1	105	65	0	0	0	0	0	0	1	0	0	1	2	0	1	1	0	0	0	1	0	1	0	1	1	0	0	0	1	0	0	0	1	0	0	3	0
866	1	55	0	1.72	64	0	21.6	4	0	0	1	0	116	80	0	1	0	0	0	1	0	0	0	1	1	0	1	0	1	0	0	1	0	1	0	1	1	0	0	0	1	0	0	1	0	0	0	1	0
868	1	69	0	1.68	65	0	23	1	1	0	0	0	90	60	0	1	1	0	0	0	0	1	1	1	2	0	1	1	0	0	0	1	0	1	0	1	1	1	0	0	1	0	0	0	1	0	0	3	0
871	1	52	0	1.7	75	0	26	3	0	0	0	1	128	72	0	0	1	1	0	0	1	0	0	1	2	0	1	1	0	0	0	1	0	1	0	1	0	1	0	1	1	0	0	0	1	0	0	2	0
872	1	57	0	1.5	49.3	1	21.9	4	0	0	1	0	108	60	0	0	0	0	0	0	1	0	0	1	1	0	1	1	0	0	0	1	0	1	0	1	0	1	0	0	1	0	0	0	1	0	0	3	0
873	1	36	0	1.76	108.3	0	35	4	0	0	1	0	130	100	0	0	0	0	0	1	0	0	0	3	3	0	1	1	0	0	0	1	0	0	0	1	1	0	0	0	0	0	0	0	1	0	0	2	0
874	1	78	1	1.5	54	1	24	4	0	0	1	0	120	80	0	0	0	0	0	1	0	0	0	1	3	0	1	1	0	0	0	1	0	1	0	1	0	0	0	0	0	0	0	0	1	0	0	3	0
875	1	73	0	1.71	80	0	27.4	1	1	0	0	0	138	86	0	0	0	0	0	1	0	0	0	3	3	0	1	1	0	0	0	1	0	1	1	1	0	1	0	0	1	0	0	0	1	0	0	1	0
876	1	64	0	1.68	72.5	0	25.7	1	1	0	0	0	124	58	0	0	1	1	0	1	0	0	0	3	3	0	1	0	1	0	0	1	0	1	1	1	0	0	1	0	1	1	0	0	1	0	0	3	0
877	1	67	0	1.61	75	0	28.9	4	0	0	1	0	129	69	0	0	1	0	0	1	0	0	0	3	1	0	1	0	1	0	1	0	0	1	1	1	1	1	1	1	1	0	0	1	0	0	0	1	0
878	2	62	0	1.5	58.2	1	25.9	3	0	0	0	1	157	85	1	0	1	1	0	1	0	0	0	1	1	1	1	0	1	0	0	0	0	1	1	1	0	1	1	1	1	0	0	1	0	0	0	3	0
879	2	68	0	1.55	75.4	0	31.4	1	1	0	0	0	110	70	0	0	0	0	0	0	0	0	0	1	1	0	1	0	1	0	0	1	0	1	0	1	0	1	0	0	0	0	0	0	1	0	0	3	0
880	2	69	0	1.5	55	1	24.4	1	1	0	0	0	84	62	0	1	1	0	0	0	0	0	1	1	1	0	1	1	0	0	0	0	0	1	0	1	1	1	0	0	1	1	0	0	1	0	0	1	0
881	1	50	0	1.74	76	0	25.1	2	0	1	0	0	133	78	0	0	1	0	0	1	0	0	1	1	1	0	1	0	1	0	0	1	0	1	0	1	0	0	0	0	1	0	0	0	1	0	0	2	0
882	1	77	1	1.6	59.1	1	23.1	1	1	0	0	0	122	72	0	1	0	0	0	1	0	0	0	1	3	0	1	1	0	0	0	0	1	1	0	1	0	1	0	0	1	0	0	0	1	0	0	2	0
883	2	69	0	1.61	62	0	23.9	2	0	1	0	0	143	78	0	0	0	0	0	1	0	0	0	1	1	0	1	1	0	0	0	1	0	1	1	1	0	1	0	0	1	0	0	0	1	0	0	1	0
884	2	54	0	1.59	73.8	0	29.2	1	1	0	0	0	148	67	0	1	1	0	0	1	0	0	1	1	1	0	1	1	0	0	0	1	0	0	1	1	0	0	0	0	0	0	0	0	1	0	0	2	0
885	2	66	0	1.45	68	0	32.3	1	1	0	0	0	130	70	0	1	1	0	0	1	0	0	1	1	1	0	1	1	0	0	0	0	1	1	1	1	0	1	0	0	0	1	0	0	1	0	0	3	0
886	2	78	1	1.45	48	1	22.8	4	0	0	1	0	136	69	0	0	0	0	0	0	0	0	0	3	1	0	1	1	0	0	0	1	0	0	0	1	0	0	0	0	1	0	0	0	1	0	0	3	0
887	1	62	0	1.7	75	0	26	3	0	0	0	1	140	90	0	0	1	1	0	1	0	0	1	1	1	0	1	1	0	0	0	0	1	1	0	1	0	0	1	0	1	0	0	1	0	0	0	2	0
888	1	38	0	1.7	115	0	39.8	4	0	0	1	0	96	62	0	0	1	0	0	0	0	0	0	3	3	0	1	1	0	0	0	1	0	1	0	1	1	0	0	0	1	0	0	1	0	0	0	1	0
889	1	56	0	1.52	58	1	25.1	1	1	0	0	0	150	70	0	1	1	0	0	1	0	0	1	1	1	0	1	1	0	0	0	0	1	1	0	1	1	0	0	0	1	0	0	0	1	0	0	4	1
890	1	76	1	1.72	65	0	22	2	0	1	0	0	116	62	1	1	1	1	0	1	1	0	0	1	1	1	1	1	0	0	0	0	1	1	0	1	0	1	1	1	1	0	0	1	0	0	0	3	0
891	1	50	0	1.5	48.5	1	21.6	5	0	0	0	1	154	74	0	0	1	1	0	1	0	0	0	3	1	0	1	1	0	0	0	1	0	1	0	1	0	0	0	0	1	0	0	0	1	0	0	1	0
892	1	73	0	1.7	69	0	23.9	4	0	0	1	0	103	68	0	0	1	1	0	1	0	0	0	1	2	1	1	1	0	0	0	0	1	1	0	1	1	1	1	1	1	0	1	0	1	0	0	3	0
893	1	80	1	1.72	50	1	16.9	4	0	0	1	0	112	76	1	1	1	0	0	1	0	0	1	1	1	1	1	1	0	0	0	1	0	1	0	1	1	0	1	1	1	1	0	0	1	0	0	3	0
894	2	76	1	1.58	51	1	20.4	5	0	0	0	1	118	82	0	1	0	0	0	1	0	0	0	1	1	0	1	0	1	0	0	0	0	0	0	1	0	1	0	0	0	0	0	1	0	0	0	3	0
896	1	57	0	1.53	50	1	21.4	1	1	0	0	0	107	63	0	1	0	0	0	1	0	0	1	3	3	0	1	1	0	0	0	1	0	0	1	1	0	1	0	0	0	0	0	0	1	0	0	2	0
898	1	66	0	1.72	61	0	20.6	3	0	0	0	1	190	98	0	1	0	0	0	1	0	0	0	2	2	0	1	1	0	0	0	0	0	1	1	1	0	0	0	0	0	0	0	1	0	0	0	3	0
899	1	60	0	1.6	74	0	28.9	1	1	0	0	0	142	88	0	1	1	0	0	1	0	0	0	3	2	0	1	1	0	0	0	1	0	1	0	1	0	0	0	0	0	1	1	0	1	0	0	1	0
900	1	53	0	1.73	97.5	0	32.6	1	1	0	0	0	158	96	0	1	1	0	0	1	0	0	0	1	3	0	1	0	1	0	0	1	0	1	1	1	0	0	0	0	1	1	0	0	1	0	0	2	0
901	2	83	1	1.4	48.5	1	24.7	5	0	0	0	1	130	62	0	0	1	1	0	1	1	0	0	1	1	1	1	1	0	0	0	0	1	1	0	1	1	1	0	1	1	1	1	0	1	0	0	3	0
902	1	61	0	1.62	72.8	0	27.7	2	0	1	0	0	140	110	0	0	1	0	0	1	0	0	0	1	3	0	1	1	0	0	0	1	0	1	1	1	1	0	1	0	1	1	1	0	1	0	0	3	0
903	1	58	0	1.6	74	0	28.9	1	1	0	0	0	166	84	0	1	1	0	0	1	1	0	0	1	3	0	1	1	0	0	0	1	0	1	1	1	0	1	0	0	1	0	0	0	1	0	0	3	0
904	2	67	0	1.56	64.6	0	26.5	1	1	0	0	0	124	68	0	1	1	1	0	1	0	0	1	1	1	0	1	1	0	0	0	1	0	1	0	1	0	1	0	1	1	1	0	0	1	0	0	2	0
905	2	65	0	1.6	50	1	19.5	2	0	1	0	0	172	94	0	0	1	0	0	1	0	0	0	1	1	0	1	0	1	0	0	1	0	1	0	1	1	0	0	0	1	0	0	1	0	0	0	2	0
907	2	63	0	1.58	50	1	20	4	0	0	1	0	122	72	0	0	1	0	0	0	0	0	0	3	3	0	1	0	1	0	0	1	0	0	0	1	0	0	0	0	1	0	0	1	0	0	0	2	0
908	1	67	0	1.73	79	0	26.4	1	1	0	0	0	154	92	1	0	1	0	0	1	0	0	0	3	3	0	1	1	0	1	0	1	0	1	1	1	1	1	0	0	1	0	0	1	0	0	0	4	1
909	1	63	0	1.68	70	0	24.8	1	1	0	0	0	150	90	0	1	0	0	0	1	0	0	0	2	3	0	1	1	0	0	0	0	1	1	1	1	0	1	0	1	1	0	0	1	0	0	0	2	0
910	2	59	0	1.56	57.5	1	23.6	1	1	0	0	0	138	88	0	1	0	0	0	1	0	0	1	1	1	0	1	1	0	0	0	0	0	0	1	1	0	1	0	0	1	0	0	1	0	0	0	1	0
911	1	54	0	1.73	86	0	28.7	4	0	0	1	0	135	87	0	0	1	1	0	0	0	0	0	3	3	0	1	0	1	0	1	1	0	1	0	1	1	1	1	1	1	1	1	1	0	0	0	3	0
912	1	74	0	1.72	91	0	30.8	1	1	0	0	0	130	90	0	1	0	0	0	1	0	0	1	1	1	0	1	1	0	0	0	1	0	1	0	1	1	0	0	0	1	0	0	0	1	0	0	3	0
913	2	59	0	1.49	60.4	0	27.2	1	1	0	0	0	152	83	0	0	0	0	0	1	0	0	0	1	1	0	1	1	0	0	0	1	0	1	0	1	0	1	0	0	1	0	0	0	1	0	0	3	0
914	2	82	1	1.58	60	0	24	2	0	1	0	0	135	65	1	1	1	0	0	1	1	0	1	1	1	1	1	1	0	0	0	0	1	1	0	1	0	1	0	0	1	0	1	1	0	0	0	4	1
915	2	66	0	1.54	57	1	24	1	1	0	0	0	138	78	0	0	0	0	0	1	0	0	0	1	1	NA	1	1	0	0	0	1	0	1	1	1	0	1	0	0	1	0	0	0	1	0	0	2	0
916	1	59	0	1.65	66.5	0	24.4	1	1	0	0	0	144	96	0	0	0	0	0	1	0	0	0	1	1	0	1	1	0	0	0	0	1	1	0	1	1	0	0	0	0	0	0	0	1	0	0	3	0
917	1	61	0	1.68	56	1	19.8	5	0	0	0	1	107	87	0	0	0	0	0	0	1	0	0	1	2	0	1	1	0	0	0	1	0	1	0	1	0	0	0	0	0	0	0	0	1	0	0	3	0
918	1	55	0	1.68	75	0	26.6	3	0	0	0	1	200	118	0	1	0	0	0	1	0	0	1	1	1	0	1	0	1	0	0	1	0	1	1	1	1	0	0	0	0	0	0	1	0	0	0	3	0
919	1	69	0	1.72	80	0	27	2	0	1	0	0	158	90	0	1	1	0	0	1	0	0	0	1	3	0	1	1	0	0	0	1	0	0	1	1	0	1	0	0	1	0	0	1	0	0	0	3	0
920	1	64	0	1.62	73	0	27.8	3	0	0	0	1	142	80	0	1	0	0	0	1	0	0	0	1	2	0	1	1	0	0	0	0	1	1	1	1	0	0	0	0	1	0	1	0	1	0	0	3	0
921	1	76	1	1.68	60	0	21.3	2	0	1	0	0	118	88	0	1	0	1	0	1	0	0	0	1	1	0	1	0	1	0	0	1	0	1	0	1	0	1	1	1	1	0	0	0	1	0	0	3	0
922	1	45	0	1.69	73	0	25.6	4	0	0	1	0	115	71	0	0	0	0	0	1	0	0	0	3	3	0	1	1	0	0	0	1	0	1	0	1	0	0	0	0	1	0	0	1	0	0	0	3	0
923	1	54	0	1.6	60	0	23.4	4	0	0	1	0	112	68	0	0	0	0	0	1	0	0	0	3	3	0	1	0	1	0	0	1	0	1	0	1	0	0	0	0	1	0	0	0	1	0	0	3	0
924	2	68	0	1.5	50	1	22.2	1	1	0	0	0	200	90	0	1	1	0	0	1	0	0	0	1	1	0	1	0	1	0	0	1	0	0	1	1	0	1	0	0	1	0	0	0	1	0	0	3	0
926	1	66	0	1.73	79	0	26.4	3	0	0	0	1	138	90	0	1	0	0	0	0	0	0	0	3	3	0	1	0	1	0	0	1	0	1	0	1	1	0	0	0	1	0	0	1	0	0	0	3	0
927	1	70	0	1.6	59.5	1	23.2	5	0	0	0	1	113	70	0	0	0	1	0	0	1	0	0	3	2	0	1	1	0	0	0	1	0	1	0	1	0	1	1	1	1	0	0	1	0	0	0	3	0
928	2	65	0	1.45	49	1	23.3	3	0	0	0	1	120	70	0	0	0	0	0	1	0	0	1	1	1	0	1	1	0	0	0	1	0	1	1	1	0	1	0	0	1	0	0	0	1	0	0	3	0
931	1	68	0	1.68	72.5	0	25.7	1	1	0	0	0	160	80	0	1	1	0	0	1	0	0	0	3	3	1	1	1	0	0	0	1	0	0	0	1	0	0	0	0	1	0	0	1	0	0	0	2	0
932	1	55	0	1.75	79.5	0	26	1	1	0	0	0	130	78	0	0	1	0	0	1	0	0	0	3	2	0	1	1	0	0	0	1	0	0	1	1	0	0	0	0	0	0	0	0	1	0	0	3	0
933	2	63	0	1.45	59	1	28.1	5	0	0	0	1	139	86	0	0	0	1	0	1	1	0	0	1	1	0	1	0	1	0	0	1	0	0	0	1	0	1	1	1	1	0	1	1	0	0	0	3	0
934	2	64	0	1.62	65	0	24.8	5	0	0	0	1	127	84	1	1	1	1	0	1	0	0	1	1	1	1	1	1	0	0	0	0	1	0	1	1	1	1	1	1	1	1	0	1	0	0	0	3	0
935	2	68	0	1.5	68	0	30.2	2	0	1	0	0	130	55	0	0	1	0	0	0	0	0	0	1	1	0	1	1	0	0	0	1	0	1	0	1	1	0	0	0	1	0	0	0	1	0	0	2	0
936	2	59	0	1.57	66	0	26.8	1	1	0	0	0	148	70	0	0	1	0	0	1	1	0	0	1	1	1	1	1	0	0	0	0	1	1	1	1	0	0	0	0	0	1	0	0	1	0	0	2	0
937	1	75	1	1.7	72	0	24.9	1	1	0	0	0	150	90	0	1	0	0	0	1	0	0	0	3	3	0	1	0	1	0	0	0	1	0	1	1	1	0	0	0	1	0	0	1	0	0	0	2	0
938	1	68	0	1.6	65	0	25.4	1	1	0	0	0	149	89	0	1	0	0	0	0	1	0	0	1	1	0	1	1	0	0	0	1	0	1	0	1	1	0	0	1	0	0	0	0	1	0	0	1	0
939	2	71	0	1.62	70	0	26.7	4	0	0	1	0	160	80	0	1	0	0	0	1	0	0	0	1	1	0	1	1	0	0	0	0	1	1	0	1	0	1	0	0	0	0	0	0	1	0	0	2	0
941	2	59	0	1.58	59	1	23.6	4	0	0	1	0	120	80	1	0	1	1	0	1	0	0	0	1	1	1	1	1	0	0	0	0	0	1	1	1	0	1	0	1	1	1	0	0	1	0	0	2	1
942	2	53	0	1.56	47.6	1	19.6	4	0	0	1	0	124	98	0	0	0	1	0	0	0	0	0	1	1	1	1	1	0	0	0	1	0	1	0	1	1	1	1	1	1	0	1	1	0	0	0	2	1
944	1	63	0	1.64	64	0	23.8	4	0	0	1	0	145	89	0	0	0	1	0	1	1	0	0	1	1	0	1	1	0	0	0	1	0	1	1	1	1	1	1	1	1	0	1	0	1	0	0	3	0
945	2	69	0	1.53	64.8	0	27.7	1	1	0	0	0	145	70	0	0	1	0	0	1	0	0	0	1	1	0	1	1	0	0	0	1	0	1	1	1	1	1	0	0	1	1	0	0	1	0	0	2	0
946	1	55	0	1.73	76	0	25.4	1	1	0	0	0	160	100	0	1	0	0	0	1	0	0	0	3	3	0	1	1	0	0	0	0	1	1	0	1	0	0	0	0	1	0	0	0	1	0	0	1	0
947	1	60	0	1.72	72	0	24.3	4	0	0	1	0	126	70	0	0	1	0	0	1	0	0	0	3	3	0	1	0	1	0	0	1	0	0	0	1	1	0	0	0	1	1	0	0	1	0	0	3	0
949	1	54	0	1.65	80	0	29.4	1	1	0	0	0	125	75	0	0	1	0	0	1	0	0	0	1	3	0	1	1	0	0	0	1	0	1	0	1	1	0	0	0	1	0	0	0	1	0	0	1	0
950	1	53	0	1.68	60	0	21.3	4	0	0	1	0	110	80	0	1	1	0	0	1	0	0	0	1	1	0	1	0	1	0	0	1	0	1	0	1	1	0	0	0	1	0	0	0	1	0	0	3	0
951	2	63	0	1.58	61	0	24.4	3	0	0	0	1	167	100	0	1	0	0	0	1	0	0	1	1	1	0	1	1	0	0	0	1	0	1	1	1	1	0	0	1	0	0	0	1	0	0	0	2	0
952	2	66	0	1.41	40	1	20.1	1	1	0	0	0	125	80	0	1	1	0	0	1	0	0	0	1	1	0	1	1	0	0	0	1	0	1	0	1	0	0	0	0	0	1	0	1	0	0	0	2	0
953	1	72	0	1.68	64	0	22.7	2	0	1	0	0	150	100	0	1	1	1	0	1	0	0	0	1	1	0	1	1	0	0	0	0	1	1	0	1	0	1	1	1	1	1	0	0	1	0	0	4	1
956	1	59	0	1.58	56.5	1	22.6	4	0	0	1	0	132	81	0	0	0	0	0	1	1	0	0	3	3	0	1	0	1	0	1	1	0	0	0	1	0	1	0	1	1	0	1	1	0	0	0	3	0
957	1	50	0	1.65	NA	NA	NA	4	0	0	1	0	104	65	0	0	1	0	0	0	0	0	0	1	3	0	1	1	0	0	0	1	0	1	0	1	1	1	0	0	1	0	0	1	0	0	0	2	0
958	2	69	0	1.4	39	1	19.9	3	0	0	0	1	164	90	1	1	1	0	0	1	0	0	0	1	1	1	1	1	0	0	0	1	0	1	1	1	0	1	0	0	1	1	0	0	1	0	0	3	0
959	1	68	0	1.65	65.7	0	24.1	1	1	0	0	0	124	67	0	0	0	0	0	0	1	0	0	3	2	0	1	1	0	0	0	1	0	1	0	1	0	1	0	0	1	0	0	1	0	0	0	3	0
960	1	73	0	1.5	49	1	21.8	2	0	1	0	0	125	66	0	1	0	0	0	1	0	0	0	1	2	1	1	1	0	0	0	1	0	1	0	1	1	1	0	0	1	0	1	0	1	0	0	3	0
961	1	47	0	1.7	51	1	17.6	5	0	0	0	1	90	65	0	0	0	1	0	0	0	0	0	1	2	0	1	0	1	0	0	1	0	1	0	1	0	1	1	1	1	0	1	0	1	0	0	1	0
962	1	70	0	1.62	60	0	22.9	4	0	0	1	0	147	80	0	0	0	0	0	1	0	0	0	1	1	1	1	0	1	0	0	1	0	1	0	1	0	0	0	0	1	0	0	0	1	0	0	3	0
963	2	66	0	1.49	41	1	18.5	2	0	1	0	0	124	76	0	1	1	0	0	1	0	0	0	1	3	0	1	0	1	0	0	1	0	1	0	1	1	1	0	1	1	0	0	1	0	0	0	3	0
964	2	52	0	1.69	66	0	23.1	5	0	0	0	1	130	80	0	0	1	1	0	0	0	0	0	1	1	0	1	1	0	0	0	1	0	1	0	1	0	0	0	1	1	1	0	1	0	0	0	2	0
965	1	60	0	1.68	74.8	0	26.5	4	0	0	1	0	124	80	0	0	0	0	0	1	0	0	0	3	1	1	1	1	0	0	0	1	0	1	0	1	1	1	0	0	1	0	0	1	0	0	0	3	0
966	1	54	0	1.65	69.7	0	25.6	1	1	0	0	0	107	71	0	0	1	0	0	1	1	0	0	2	1	0	1	1	0	0	0	1	0	1	0	1	0	0	0	0	0	1	0	0	1	0	0	3	0
967	1	71	0	1.65	66.5	0	24.4	1	1	0	0	0	124	77	0	0	0	0	0	1	0	0	0	2	2	0	1	1	0	0	0	1	0	1	0	1	0	1	0	1	1	0	1	0	1	0	0	2	0
968	2	64	0	1.46	44.6	1	20.9	4	0	0	1	0	130	70	0	0	0	0	0	1	0	0	0	1	1	1	1	0	1	0	0	1	0	1	0	1	0	1	0	0	1	0	1	0	1	0	0	2	0
969	1	53	0	1.63	60.8	0	22.9	1	1	0	0	0	126	70	0	0	1	0	0	1	0	0	0	3	3	0	1	1	0	0	0	1	0	1	0	1	0	1	0	0	1	0	0	0	1	0	0	2	0
970	2	80	1	1.54	60	0	25.3	2	0	1	0	0	137	81	0	0	1	0	0	1	0	0	0	1	1	0	1	1	0	0	0	1	0	1	0	1	1	0	0	0	1	0	0	0	1	0	0	2	0
971	2	71	0	1.45	52.3	1	24.9	1	1	0	0	0	181	87	0	0	0	0	0	1	0	0	1	1	1	1	1	1	0	0	0	1	0	1	1	1	0	1	0	0	1	0	0	0	1	0	0	2	0
972	1	67	0	1.56	40	1	16.4	1	1	0	0	0	170	100	0	1	0	0	0	1	0	0	0	3	3	0	1	1	0	0	0	1	0	1	0	1	0	0	0	0	1	0	0	1	0	0	0	2	0
973	1	75	1	1.62	NA	NA	NA	4	0	0	1	0	96	62	0	0	0	1	0	1	0	0	0	3	3	0	1	0	1	0	0	0	0	0	0	1	1	1	1	1	1	0	1	0	1	0	0	3	1
974	1	69	0	1.67	92	0	33	4	0	0	1	0	140	80	0	0	1	0	0	1	0	0	0	3	2	0	1	1	0	0	0	1	0	1	1	1	1	0	0	0	1	0	0	1	0	0	0	1	0
975	1	47	0	1.7	92	0	31.8	1	1	0	0	0	140	80	0	0	1	0	0	1	1	0	0	3	2	0	1	0	1	0	0	0	1	1	1	1	0	0	0	1	0	1	0	1	0	0	0	2	0
977	1	73	0	1.7	76.5	0	26.5	2	0	1	0	0	145	85	0	1	1	0	0	1	0	0	0	1	3	0	1	1	0	0	0	1	0	0	0	1	0	1	0	0	1	0	0	1	0	0	0	3	0
979	1	67	0	1.72	78.9	0	26.7	1	1	0	0	0	130	80	0	0	0	0	0	1	0	0	0	1	2	0	1	1	0	0	0	1	0	1	0	1	0	1	0	0	1	0	0	0	1	0	0	2	0
981	1	49	0	1.68	74	0	26.2	1	1	0	0	0	133	90	0	0	0	0	0	1	0	0	0	1	3	0	1	1	0	0	0	1	0	1	1	1	0	1	0	0	1	0	0	0	1	0	0	1	0
982	1	47	0	1.62	53	1	20.2	2	0	1	0	0	112	75	0	1	0	0	0	0	0	0	0	1	3	0	1	1	0	0	0	0	0	0	0	1	0	1	0	1	0	0	0	0	1	0	0	3	0
983	1	62	0	1.55	52	1	21.6	1	1	0	0	0	147	65	0	0	0	0	0	1	0	0	0	2	3	0	1	1	0	0	0	1	0	0	0	1	0	1	0	0	0	0	0	0	1	0	0	1	0
984	1	61	0	1.7	69	0	23.9	1	1	0	0	0	167	90	0	1	1	0	0	1	0	0	0	3	3	0	1	1	0	0	0	1	0	1	1	1	0	0	0	0	1	0	0	0	1	0	0	3	0
985	1	59	0	1.68	65	0	23	1	1	0	0	0	122	72	0	0	1	0	0	0	0	0	0	3	3	0	1	1	0	0	0	1	0	1	0	1	0	0	0	0	0	0	0	0	1	0	0	2	0
986	1	51	0	1.58	57.8	1	23.2	4	0	0	1	0	103	61	0	0	0	0	0	0	0	0	0	1	1	0	1	1	0	0	0	1	0	1	0	1	0	0	0	0	1	0	0	0	1	0	0	3	0
988	2	77	1	1.5	75	0	33.3	3	0	0	0	1	150	62	0	1	0	0	0	1	0	0	0	1	1	1	1	1	0	0	0	1	0	1	0	1	0	1	0	0	1	0	1	0	1	0	0	3	0
990	1	67	0	1.7	67	0	23.2	3	0	0	0	1	146	86	0	0	1	0	0	1	1	0	0	1	1	0	1	1	0	0	0	1	0	1	0	1	0	0	0	0	1	0	0	1	0	0	0	3	0
993	1	36	0	1.8	79.9	0	24.7	5	0	0	0	1	138	87	0	0	0	0	0	1	0	0	0	1	2	0	1	0	1	0	0	1	0	1	1	1	0	1	0	0	1	0	1	0	1	0	0	3	0
994	2	65	0	1.54	52	1	21.9	4	0	0	1	0	112	80	0	0	0	0	0	1	0	0	0	1	1	0	1	0	1	0	0	1	0	1	0	1	0	1	0	0	1	0	1	1	0	0	0	3	0
997	1	47	0	1.6	75.8	0	29.6	1	1	0	0	0	157	100	1	1	0	0	0	1	0	0	0	3	3	1	1	1	0	0	0	0	1	1	1	1	0	1	0	0	1	0	0	1	0	0	0	3	0
1000	1	50	0	1.61	70.4	0	27.2	1	1	0	0	0	130	78	0	0	1	0	0	0	0	0	0	1	1	0	1	1	0	0	0	0	0	1	0	1	0	1	0	0	1	0	0	0	1	0	0	3	0
1002	1	54	0	1.68	63	0	22.3	2	0	1	0	0	137	96	1	0	0	1	0	1	0	0	0	1	3	1	1	1	0	0	0	1	0	1	1	1	0	1	1	1	1	0	1	0	1	0	0	3	0
1003	2	71	0	1.65	60.8	0	22.3	1	1	0	0	0	110	82	0	0	1	0	0	0	0	0	0	1	1	0	1	1	0	0	0	0	0	1	0	1	1	0	0	0	1	1	0	0	1	0	0	4	1
1004	1	72	0	1.64	55	1	20.4	1	1	0	0	0	132	80	0	0	0	1	0	1	0	0	0	1	1	0	1	1	0	0	0	0	1	1	0	1	0	0	0	0	1	0	0	1	0	0	0	1	0
1006	1	53	0	1.68	70	0	24.8	1	1	0	0	0	139	72	0	0	1	0	0	1	0	0	0	3	3	0	1	0	1	0	0	1	0	0	0	1	0	0	0	0	1	1	0	1	0	0	0	1	0
1007	1	70	0	1.65	50	1	18.4	2	0	1	0	0	155	78	0	0	1	1	0	1	1	0	0	1	2	0	1	0	1	0	0	0	1	1	1	1	0	1	1	1	1	1	0	0	1	0	0	3	0
1008	1	61	0	1.6	65	0	25.4	4	0	0	1	0	118	74	0	0	1	0	0	0	0	0	0	3	3	0	1	0	1	0	0	1	0	1	0	1	1	0	0	1	1	0	1	1	0	0	0	1	0
1009	2	58	0	1.51	60.6	0	26.6	3	0	0	0	1	125	72	0	0	1	0	0	1	1	0	0	1	1	0	1	1	0	0	0	1	0	1	1	1	1	0	0	0	1	0	0	0	1	0	0	3	0
1010	1	31	0	1.8	105	0	32.4	4	0	0	1	0	146	90	0	0	1	0	0	0	0	0	0	3	3	0	1	0	1	0	0	1	0	1	0	1	1	1	0	0	1	1	1	1	0	0	0	3	0
1011	1	52	0	1.65	65	0	23.9	4	0	0	1	0	114	73	0	0	1	0	0	1	0	0	0	1	1	0	1	0	1	0	0	1	0	1	0	1	1	0	0	0	1	0	1	1	0	0	0	3	0
1012	1	65	0	1.65	66.7	0	24.5	1	1	0	0	0	148	82	0	0	1	0	0	1	0	0	0	1	3	0	1	1	0	0	0	1	0	0	0	1	0	0	0	0	0	0	0	0	1	0	0	1	0
1013	1	48	0	1.6	77	0	30.1	1	1	0	0	0	130	80	0	0	1	0	0	1	1	0	0	1	2	0	1	0	1	0	0	1	0	1	0	1	0	1	0	0	0	1	0	0	1	0	0	3	0
1014	1	75	1	1.51	63.9	0	28	1	1	0	0	0	150	90	0	0	0	0	0	1	0	0	0	3	2	1	1	1	0	0	0	1	0	1	1	1	0	1	0	0	1	0	0	0	1	0	0	4	1
1015	2	55	0	1.55	50	1	20.8	1	1	0	0	0	140	84	0	1	1	0	0	0	0	0	0	1	1	0	1	0	1	0	0	0	0	1	0	1	0	1	0	0	1	1	0	1	0	0	0	1	0
1016	1	62	0	1.67	72	0	25.8	4	0	0	1	0	148	82	0	0	0	0	0	1	0	0	0	1	3	0	1	0	1	0	0	1	0	1	0	1	1	0	0	0	1	0	0	1	0	0	0	2	0
1017	1	69	0	1.73	77	0	25.7	1	1	0	0	0	122	78	0	0	1	0	0	1	0	0	0	3	2	0	1	1	0	0	0	1	0	0	0	1	0	0	0	0	0	1	0	0	1	0	0	3	0
1018	2	59	0	1.45	44	1	20.9	3	0	0	0	1	122	84	0	1	0	0	0	1	1	0	0	1	1	0	1	1	0	0	0	0	1	1	0	1	1	1	0	0	1	0	0	0	1	0	0	3	0
1022	2	74	0	1.55	50	1	20.8	4	0	0	1	0	110	69	0	0	1	0	0	1	0	0	0	1	1	1	1	0	1	0	0	1	0	1	0	1	1	0	0	1	1	0	1	1	0	0	0	3	0
1025	2	67	0	1.65	60	0	22	4	0	0	1	0	124	78	0	0	0	0	0	1	0	0	0	1	1	1	1	1	0	0	0	1	0	0	0	1	0	1	0	0	1	0	0	0	1	0	0	2	0
1026	1	62	0	1.68	66	0	23.4	5	0	0	0	1	110	68	0	0	1	0	0	1	1	0	0	1	3	0	1	1	0	0	0	1	0	1	0	1	0	1	0	0	1	0	0	0	1	0	0	3	0
1027	1	75	1	1.75	60	0	19.6	4	0	0	1	0	75	49	0	0	0	1	0	0	0	0	0	1	1	0	1	0	1	0	0	0	0	1	0	1	0	1	0	1	1	0	1	0	1	0	0	3	0
1028	1	53	0	1.6	66	0	25.8	4	0	0	1	0	90	60	0	1	1	0	0	1	0	0	0	1	3	0	1	0	1	0	0	1	0	1	1	1	1	0	0	0	1	0	0	1	0	0	0	3	0
1029	1	59	0	1.64	70	0	26	4	0	0	1	0	110	70	0	1	1	0	0	0	0	0	0	3	2	0	1	0	1	0	0	1	0	1	0	1	1	0	0	0	1	0	1	1	0	0	0	3	0
1030	2	70	0	1.58	52	1	20.8	4	0	0	1	0	90	62	0	0	0	0	0	1	0	0	0	1	1	0	1	0	1	0	0	1	0	1	0	1	1	0	0	1	1	0	1	1	0	0	0	2	0
1031	1	77	1	1.68	71	0	25.2	1	1	0	0	0	128	81	0	1	0	0	0	0	0	0	0	1	1	1	1	1	0	0	0	1	0	0	0	1	0	1	0	0	1	0	0	0	1	0	0	2	0
1032	1	51	0	1.65	60	0	22	1	1	0	0	0	120	90	0	1	1	0	0	0	0	0	0	1	1	1	1	0	1	0	0	1	0	1	0	1	0	1	0	0	0	1	0	0	1	0	0	1	0
1034	1	65	0	1.65	80	0	29.4	2	0	1	0	0	140	92	0	0	1	0	0	1	0	0	0	1	2	0	1	0	1	0	0	0	1	1	0	1	1	1	0	0	1	1	0	1	0	0	0	2	0
1035	2	73	0	1.65	80	0	29.4	4	0	0	1	0	91	50	0	0	1	1	0	0	0	0	0	1	1	1	1	0	1	0	0	1	0	1	0	1	1	1	1	1	1	0	1	0	1	0	0	3	0
1036	1	73	0	1.65	77	0	28.3	2	0	1	0	0	120	80	0	1	0	0	0	0	1	0	0	3	2	1	1	1	0	0	0	0	1	1	0	1	0	1	0	0	0	0	0	0	1	0	0	3	0
1037	1	81	1	1.55	55.5	1	23.1	2	0	1	0	0	152	84	0	0	1	0	0	1	0	0	0	1	2	1	1	1	0	0	0	1	0	1	1	1	1	0	0	1	1	1	1	0	1	0	0	3	0
1038	1	50	0	1.78	83	0	26.2	4	0	0	1	0	120	80	0	1	1	0	1	1	0	0	0	1	3	0	1	1	0	0	0	1	0	1	0	1	0	1	0	0	1	0	0	1	0	0	0	3	0
1039	2	79	1	1.55	45	1	18.7	4	0	0	1	0	105	51	0	1	0	0	0	1	0	0	1	1	1	0	1	0	1	0	0	1	0	0	0	1	1	0	0	1	1	0	1	1	0	0	0	3	0
1041	1	67	0	1.62	56.9	1	21.7	4	0	0	1	0	122	66	0	0	0	0	0	1	0	0	0	1	1	1	1	1	0	0	0	0	1	1	0	1	0	1	0	0	1	0	0	0	1	0	0	3	0
1042	1	66	0	1.58	61	0	24.4	1	1	0	0	0	116	95	0	1	0	0	0	0	1	0	0	1	1	0	1	1	0	0	0	1	0	1	0	1	0	1	0	1	1	0	0	0	1	0	0	3	0
1043	2	53	0	1.55	62	0	25.8	4	0	0	1	0	150	80	0	1	0	0	0	0	0	0	0	1	1	0	1	1	0	0	0	1	0	1	0	1	0	1	0	0	1	0	0	1	0	0	0	2	0
1044	1	51	0	1.72	74.1	0	25	1	1	0	0	0	130	82	0	0	1	0	0	0	0	0	0	3	3	0	1	1	0	0	0	1	0	1	0	1	1	0	0	0	1	1	1	1	0	0	0	1	0
1045	2	50	0	1.52	40.5	1	17.5	4	0	0	1	0	110	80	0	1	0	1	0	1	0	0	0	1	1	0	1	1	0	0	0	1	0	1	0	1	1	0	1	1	1	0	0	1	0	0	0	1	0
1046	1	63	0	1.7	62	0	21.5	2	0	1	0	0	105	64	0	1	0	0	0	0	0	0	1	3	3	0	1	0	1	0	0	0	0	1	0	1	1	0	0	0	1	0	0	1	0	0	0	3	0
1047	1	72	0	1.75	51.3	1	16.8	1	1	0	0	0	120	70	0	0	1	1	0	0	0	0	0	1	3	0	1	1	0	0	0	1	0	1	0	1	0	1	1	1	1	0	0	0	1	0	0	4	1
1048	1	55	0	1.65	71.5	0	26.3	1	1	0	0	0	120	78	0	0	1	0	0	0	0	0	0	1	2	0	1	1	0	0	0	0	0	0	0	1	0	1	0	0	1	0	0	0	1	0	0	3	0
1049	2	62	0	1.5	47.6	1	21.2	1	1	0	0	0	108	64	0	0	0	1	0	1	0	0	0	1	1	0	1	1	0	0	0	1	0	1	0	1	0	1	0	0	0	0	0	0	1	0	0	1	0
1050	1	50	0	1.63	NA	NA	NA	4	0	0	1	0	168	97	0	0	1	0	0	1	0	0	0	1	1	0	1	1	0	0	0	1	0	1	1	1	0	0	0	0	1	0	0	0	1	0	0	1	0
1051	2	58	0	1.52	49	1	21.2	1	1	0	0	0	160	90	0	0	1	0	0	1	0	0	0	1	1	0	1	1	0	1	0	1	0	1	1	1	1	1	0	0	1	1	1	1	0	0	0	3	0
1052	2	53	0	1.45	53	1	25.2	1	1	0	0	0	150	85	0	1	1	0	0	1	0	0	0	1	1	0	1	1	0	0	0	1	0	1	0	1	0	1	0	0	1	0	0	1	0	0	0	3	0
1053	1	67	0	1.5	64	0	28.4	4	0	0	1	0	180	120	0	1	0	0	0	1	0	0	1	3	2	0	1	0	1	0	0	1	0	1	1	1	1	1	0	0	1	0	0	1	0	0	0	1	0
1054	1	53	0	1.58	69	0	27.6	4	0	0	1	0	142	90	0	1	0	0	0	1	0	0	1	3	3	0	1	0	1	0	0	1	0	1	0	1	1	0	0	0	1	0	1	1	0	0	0	4	1
1055	1	59	0	1.74	76.5	0	25.3	1	1	0	0	0	132	76	0	1	1	0	0	1	0	0	0	1	2	0	1	1	0	0	0	0	0	1	0	1	0	0	0	0	0	1	0	0	1	0	0	3	0
1056	2	73	0	1.46	52	1	24.4	1	1	0	0	0	150	98	0	0	1	0	0	1	0	0	1	1	1	1	1	1	0	0	0	1	0	1	1	1	1	1	0	0	1	0	0	0	1	0	0	3	0
1058	2	73	0	1.55	58	1	24.1	2	0	1	0	0	150	88	0	1	1	0	0	0	0	0	0	1	1	0	1	0	1	0	0	1	0	1	0	1	1	0	0	0	1	0	0	0	1	0	0	3	0
1059	1	73	0	1.65	58	1	21.3	2	0	1	0	0	121	74	0	1	0	0	0	0	0	0	0	2	2	0	1	0	1	0	0	1	0	1	0	1	0	0	0	0	1	0	0	1	0	0	0	1	0
1060	1	41	0	1.62	65	0	24.8	4	0	0	1	0	107	70	0	1	1	1	0	0	0	0	0	1	1	0	1	0	1	0	0	1	0	1	0	1	1	0	0	0	1	0	0	1	0	0	0	1	0
1061	1	65	0	1.68	63	0	22.3	4	0	0	1	0	144	78	0	1	1	0	0	1	1	0	1	1	2	0	1	0	1	0	0	1	0	1	0	1	0	1	0	0	1	0	0	1	0	0	0	3	0
1062	1	76	1	1.73	76	0	25.4	5	0	0	0	1	118	63	0	0	1	1	0	0	1	0	0	1	1	1	1	1	0	0	0	1	0	1	0	1	0	1	0	0	1	1	0	0	1	0	0	2	0
1063	1	75	1	1.7	66	0	22.8	4	0	0	1	0	106	70	0	0	1	1	0	0	0	0	1	1	2	1	1	1	0	0	0	1	0	1	0	1	0	1	1	1	1	0	1	0	1	0	0	3	0
1064	1	63	0	1.6	63	0	24.6	4	0	0	1	0	118	73	0	0	0	0	0	0	0	0	0	2	3	0	1	0	1	0	0	0	0	0	0	1	1	1	0	1	1	0	0	1	0	0	0	1	0
1065	1	66	0	1.69	71	0	24.9	4	0	0	1	0	138	69	0	1	1	0	0	0	0	0	0	3	3	0	1	0	1	0	0	0	0	0	0	1	1	0	0	0	1	0	1	0	1	0	0	3	0
1066	1	68	0	1.65	71.5	0	26.3	1	1	0	0	0	158	82	0	1	1	0	0	1	1	0	0	2	2	0	1	1	0	0	0	1	0	1	0	1	1	1	0	0	1	1	0	0	1	0	0	3	0
1067	1	76	1	1.8	85.5	0	26.4	5	0	0	0	1	152	79	0	1	1	0	0	1	0	0	1	1	2	0	1	1	0	0	0	0	1	1	1	1	0	1	1	0	1	1	0	0	1	0	0	3	0
1068	1	62	0	1.68	63	0	22.3	4	0	0	1	0	142	74	0	0	1	0	0	0	0	0	0	3	3	0	1	0	1	0	0	0	0	1	0	1	0	0	0	0	1	0	0	1	0	0	0	4	1
1069	1	75	1	1.69	NA	NA	NA	4	0	0	1	0	120	62	0	0	0	0	0	0	0	0	0	3	1	0	1	0	1	0	1	1	0	0	0	1	1	1	0	1	1	0	1	1	0	0	0	1	0
1070	2	71	0	1.54	59	1	24.9	1	1	0	0	0	150	90	0	0	1	1	0	1	1	0	0	1	1	0	1	0	1	0	0	1	0	1	0	1	1	1	1	1	1	0	1	1	0	0	0	3	0
1071	1	39	0	1.63	68	0	25.6	4	0	0	1	0	120	58	0	0	1	0	0	0	0	0	0	3	3	0	1	1	0	0	0	1	0	1	0	1	1	0	0	0	1	0	0	1	0	0	0	4	1
1072	2	77	1	1.42	50	1	24.8	1	1	0	0	0	150	80	0	1	0	0	0	1	0	0	0	1	1	0	1	0	1	0	0	1	0	0	1	1	1	1	0	0	1	0	1	0	1	0	0	2	0
1074	1	54	0	1.65	70.4	0	25.9	1	1	0	0	0	110	74	0	0	1	0	0	0	0	0	0	3	3	1	1	1	0	0	0	0	0	0	0	1	1	1	0	0	1	0	0	1	0	0	0	3	0
1075	1	54	0	1.62	68.3	0	26	1	1	0	0	0	140	90	0	1	0	0	0	1	0	0	0	1	3	0	1	1	0	0	0	1	0	1	0	1	0	1	0	0	0	0	0	0	1	0	0	3	0
1076	1	70	0	1.6	74	0	28.9	5	0	0	0	1	158	90	0	0	1	1	0	1	0	0	1	1	1	0	1	1	0	0	0	1	0	1	1	1	1	1	1	1	1	1	0	0	1	0	0	3	0
1077	1	78	1	1.7	72	0	24.9	4	0	0	1	0	161	99	0	0	0	1	0	0	0		1	1	2	1	1	0	1	0	0	1	0	1	0	1	0	1	1	1	1	0	1	0	1	0	0	3	0
1078	1	51	0	1.6	61	0	23.8	3	0	0	0	1	124	88	0	1	0	0	0	1	0	0	0	3	3	0	1	1	0	0	0	1	0	1	0	1	0	1	0	0	1	0	0	1	0	0	0	3	0
1079	1	59	0	1.71	63	0	21.5	1	1	0	0	0	128	78	0	1	1	0	0	1	0	0	0	1	1	0	1	1	0	0	0	1	0	0	1	1	0	1	0	0	1	1	0	1	0	0	0	3	0
1081	2	73	0	1.56	60.8	0	25	1	1	0	0	0	130	70	0	1	1	0	0	1	0	0	0	1	1	0	1	1	0	0	0	1	0	1	1	1	0	1	0	0	1	1	1	1	0	0	0	3	0
1083	1	34	0	1.62	77	0	29.3	4	0	0	1	0	125	84	0	0	0	0	0	0	0	0	0	3	3	0	1	0	1	0	0	1	0	1	0	1	1	0	0	0	1	0	0	1	0	0	0	3	0
1084	2	63	0	1.54	50	1	21.1	4	0	0	1	0	115	75	0	0	1	0	0	0	0	0	0	1	1	1	1	0	1	0	0	1	0	1	0	1	1	0	0	0	1	0	0	1	0	0	0	3	0
1085	1	51	0	1.71	85	0	29.1	3	0	0	0	1	128	80	0	1	1	0	0	1	0	0	0	1	1	0	1	1	0	0	0	0	1	1	0	1	0	1	0	0	0	1	0	1	0	0	0	3	0
1086	1	66	0	1.75	73.3	0	23.9	5	0	0	0	1	137	70	0	1	0	1	0	1	0	0	1	2	2	1	1	1	0	0	0	1	0	1	1	1	1	1	0	1	1	0	0	1	0	0	0	2	0
1087	1	77	1	1.65	61	0	22.4	2	0	1	0	0	181	84	0	0	1	0	0	1	0	0	0	2	2	0	1	1	0	0	0	0	1	1	1	1	0	0	0	0	1	1	0	0	1	0	0	3	0
1088	1	54	0	1.58	58	1	23.2	2	0	1	0	0	134	78	0	0	0	0	0	1	0	0	0	1	1	0	1	0	1	0	0	1	0	1	0	1	1	0	0	0	1	0	0	1	0	0	0	3	0
1089	1	75	1	1.64	60	0	22.3	2	0	1	0	0	106	64	0	1	0	0	0	1	0	0	1	3	2	0	1	1	0	0	0	1	0	1	0	1	1	1	0	0	1	0	0	0	1	0	0	3	0
1090	1	51	0	1.65	77	0	28.3	4	0	0	1	0	107	68	0	1	1	0	0	0	0	0	0	1	1	0	1	1	0	0	0	0	1	1	0	1	1	0	0	0	1	1	0	1	0	0	0	3	0
1091	1	75	1	1.6	65	0	25.4	1	1	0	0	0	120	70	0	0	1	1	0	1	1	0	1	3	2	1	1	1	0	0	0	1	0	1	0	1	0	0	0	0	1	1	0	0	1	0	0	2	0
1092	1	44	0	1.73	80.7	0	27	4	0	0	1	0	140	71	0	0	0	0	0	0	0	0	0	1	3	0	1	1	0	0	0	1	0	0	0	1	1	1	0	0	1	0	0	0	1	0	0	2	0
1093	1	53	0	1.7	60	0	20.8	2	0	1	0	0	122	75	0	1	0	0	0	0	0	0	0	3	3	0	1	0	1	0	0	1	0	1	0	1	1	0	0	0	1	0	0	1	0	0	0	2	0
1094	1	53	0	1.72	80	0	27	1	1	0	0	0	130	90	0	0	1	0	0	1	0	0	0	1	1	0	1	1	0	0	0	1	0	1	1	1	0	1	0	0	1	1	0	1	0	0	0	3	0
1095	2	49	0	1.55	61.5	0	25.6	2	0	1	0	0	123	72	0	0	0	0	0	1	0	0	0	1	1	0	1	1	0	0	0	1	0	1	0	1	0	0	0	0	1	0	0	1	0	0	0	1	0
1096	1	60	0	1.52	59.5	1	25.8	1	1	0	0	0	132	88	0	1	0	0	0	0	0	0	0	1	1	0	1	1	0	0	0	1	0	1	0	1	0	1	0	0	1	0	0	0	1	0	0	3	0
1097	1	70	0	1.67	70	0	25.1	2	0	1	0	0	125	79	0	0	1	0	0	1	0	0	1	3	2	0	1	0	1	0	1	1	0	1	0	1	0	1	1	0	1	0	0	0	1	0	0	2	0
159	1	42	0	1.63	60	0	22.6	3	0	0	0	1	120	70	0	0	1	0	0	0	0	0	0	3	3	0	1	1	0	0	0	1	0	1	0	1	0	0	0	0	0	0	0	1	0	0	0	1	0
167	1	42	0	1.7	65	0	22.5	4	0	0	1	0	142	90	0	0	0	0	0	0	0	0	0	1	3	0	1	0	1	0	0	0	0	1	0	1	1	0	0	0	1	0	0	1	0	0	0	2	0
174	1	56	0	1.65	84.9	0	31.2	1	1	0	0	0	135	76	0	0	0	0	0	0	0	0	0	3	1	0	1	1	0	0	0	1	0	1	0	1	0	0	0	0	1	0	0	1	0	0	0	3	0
192	1	47	0	1.73	80	0	26.7	1	1	0	0	0	127	71	0	0	0	0	0	0	0	0	0	1	1	0	1	1	0	0	0	0	0	1	0	1	1	0	0	0	1	0	0	1	0	0	0	1	0
208	1	69	0	1.55	62	0	25.8	2	0	1	0	0	123	68	0	1	0	0	0	0	0	0	0	1	3	0	1	1	0	0	0	1	0	1	0	1	0	1	0	0	1	0	0	1	0	0	0	2	0
212	1	49	0	1.63	63.5	0	23.9	4	0	0	1	0	105	75	0	0	0	0	0	0	0	0	0	3	3	0	1	1	0	0	0	1	0	1	0	1	1	1	0	0	1	1	0	1	0	0	0	2	0
223	1	43	0	1.75	70	0	22.9	4	0	0	1	0	107	74	0	0	0	0	0	0	0	0	0	3	3	0	1	1	0	0	0	1	0	1	0	1	1	0	0	0	1	0	0	1	0	0	0	1	0
224	1	61	0	1.62	62	0	23.6	1	1	0	0	0	120	80	1	0	0	0	0	0	1	0	0	3	3	0	1	1	0	0	0	1	0	1	0	1	1	0	0	0	0	0	0	1	0	0	0	3	0
251	1	49	0	1.67	76	0	27.3	5	0	0	0	1	130	90	0	0	0	0	0	1	0	0	0	1	3	0	1	1	0	0	0	0	0	0	0	1	0	0	0	0	1	0	0	1	0	0	0	1	0
262	1	68	0	1.58	50	1	20	1	1	0	0	0	135	75	0	0	0	0	0	0	0	0	0	2	2	0	1	1	0	0	0	1	0	1	0	1	0	0	0	0	1	0	0	1	0	0	0	3	0
263	1	50	0	1.68	70	0	24.8	1	1	0	0	0	120	86	0	0	0	0	0	0	0	0	0	3	3	0	1	1	0	0	0	1	0	0	0	1	1	1	0	0	1	0	0	1	0	0	0	2	0
274	1	47	0	1.6	64	0	25	5	0	0	0	1	108	72	0	0	0	0	0	0	1	0	0	3	1	0	1	1	0	0	0	1	0	1	0	1	0	0	0	0	1	0	0	1	0	0	0	3	0
284	1	58	0	1.58	69.5	0	27.8	4	0	0	1	0	104	70	0	0	0	0	0	0	0	0	0	3	3	0	1	1	0	0	0	1	0	1	0	1	0	1	0	0	1	0	0	1	0	0	0	3	1
287	1	46	0	1.61	70	0	27	4	0	0	1	0	136	90	0	0	0	0	0	0	0	0	0	3	3	0	1	0	1	0	0	1	0	1	0	1	1	1	0	0	1	0	1	1	0	0	0	3	0
294	1	50	0	1.65	65	0	23.9	3	0	0	0	1	140	94	0	0	0	0	0	1	1	0	0	1	2	0	1	1	0	0	0	1	0	1	0	1	0	0	0	0	1	0	0	1	0	0	0	3	0
313	1	52	0	1.72	69	0	23.3	1	1	0	0	0	128	80	0	0	0	0	0	0	0	0	0	3	3	0	1	1	0	0	0	0	0	0	0	1	0	0	0	0	0	0	0	1	0	0	0	1	0
323	1	47	0	1.74	71	0	23.5	1	1	0	0	0	120	70	0	0	0	0	0	0	0	0	0	3	2	0	1	1	0	0	0	0	0	1	0	1	0	0	0	0	1	0	0	1	0	0	0	2	0
328	1	54	0	1.7	72	0	24.9	4	0	0	1	0	124	90	0	0	0	0	0	0	1	0	0	3	3	0	1	1	0	0	0	1	0	1	0	1	0	0	0	0	1	0	0	1	0	0	0	2	0
337	1	43	0	1.67	62	0	22.2	1	1	0	0	0	130	80	0	0	0	0	0	0	0	0	0	3	3	0	1	1	0	0	0	1	0	1	0	1	1	1	0	0	1	0	0	1	0	0	0	1	0
341	1	65	0	1.66	72	0	26.1	4	0	0	1	0	100	46	0	0	0	0	0	0	0	0	0	3	3	0	1	1	0	0	0	0	0	0	0	1	1	1	0	1	1	0	0	1	0	0	0	1	0
344	1	33	0	1.68	65	0	23	4	0	0	1	0	100	70	0	0	0	0	0	0	0	0	0	1	1	0	1	1	0	0	0	1	0	1	0	1	0	0	0	0	1	0	0	1	0	0	0	2	0
348	1	61	0	1.63	67	0	25.2	1	1	0	0	0	125	70	0	0	0	0	0	0	0	0	0	1	3	0	1	1	0	0	0	1	0	1	0	1	0	1	0	0	1	0	0	1	0	0	0	1	0
368	1	53	0	1.7	60.8	0	21	4	0	0	1	0	94	54	0	0	0	0	0	0	0	0	0	1	3	0	1	0	1	0	0	0	0	1	0	1	1	0	0	0	1	0	0	1	0	0	0	1	0
379	1	52	0	1.67	83.6	0	30	2	0	1	0	0	116	70	0	0	0	0	0	0	0	0	0	1	2	0	1	1	0	0	0	1	0	1	0	1	0	0	0	0	1	0	0	1	0	0	0	1	0
405	1	46	0	1.58	60	0	24	4	0	0	1	0	90	59	0	0	0	0	0	0	0	0	0	3	3	0	1	1	0	0	0	1	0	0	0	1	0	0	0	0	1	0	0	1	0	0	0	2	0
407	1	62	0	1.58	62.2	0	24.9	2	0	1	0	0	136	79	0	0	0	0	0	1	0	0	0	1	1	0	1	0	1	0	0	0	1	1	1	1	0	1	0	0	1	0	0	0	1	0	1	3	0
408	1	64	0	1.72	65	0	22	1	1	0	0	0	100	70	0	1	0	0	0	0	0	0	0	3	1	0	1	1	0	0	0	0	0	1	0	1	0	0	0	0	1	0	0	1	0	0	0	1	0
414	1	51	0	1.68	74	0	26.2	4	0	0	1	0	140	91	0	0	0	0	0	1	0	0	0	1	3	0	1	0	1	0	0	1	0	1	1	1	0	1	0	0	1	0	0	0	1	0	0	2	0
433	1	35	0	1.73	98	0	32.7	2	0	1	0	0	120	80	0	0	0	0	0	1	0	0	0	3	3	0	1	1	0	0	0	1	0	1	0	1	0	0	0	0	1	0	0	1	0	0	0	3	0
437	1	53	0	1.65	55	1	20.2	4	0	0	1	0	130	75	0	0	0	0	0	0	0	0	0	1	3	0	1	1	0	0	0	1	0	1	0	1	0	0	0	0	0	0	0	1	0	0	0	2	0
471	1	46	0	1.62	71	0	27.1	4	0	0	1	0	120	80	0	0	0	0	0	0	0	0	0	3	3	0	1	1	0	0	0	1	0	1	0	1	0	0	0	0	1	0	0	1	0	0	0	1	0
485	1	58	0	1.65	69.5	0	25.5	1	1	0	0	0	130	74	0	0	0	0	0	0	0	0	0	1	2	0	1	0	1	0	0	1	0	1	0	1	0	1	0	0	1	0	0	1	0	0	0	3	0
494	1	49	0	1.66	70	0	25.4	4	0	0	1	0	116	86	0	0	0	0	0	0	0	0	0	1	3	0	1	1	0	0	0	1	0	1	0	1	0	0	0	0	1	0	0	1	0	0	0	2	0
506	1	52	0	1.71	72.5	0	24.8	4	0	0	1	0	120	80	0	0	0	0	0	0	0	0	0	3	3	0	1	0	1	0	0	1	0	1	0	1	0	0	0	0	1	0	0	1	0	0	0	2	0
526	1	57	0	1.7	73	0	25.3	3	0	0	0	1	110	80	0	0	1	0	0	0	0	0	0	1	2	0	1	1	0	0	0	1	0	1	0	1	0	1	0	0	1	1	0	1	0	0	0	2	0
557	1	67	0	1.64	62.5	0	23.2	3	0	0	0	1	90	61	0	0	0	0	0	0	1	0	0	3	1	0	1	1	0	0	0	1	0	0	0	1	0	0	0	0	0	0	0	1	0	0	0	3	0
577	1	62	0	1.64	69	0	25.7	4	0	0	1	0	120	70	0	0	1	0	0	0	0	0	0	3	3	0	1	1	0	0	0	1	0	1	0	1	0	0	0	0	1	1	0	1	0	0	0	3	0
584	1	70	0	1.68	74.3	0	26.3	3	0	0	0	1	136	80	0	0	0	0	0	0	0	0	0	3	2	0	1	1	0	0	0	1	0	1	0	1	0	1	0	0	1	0	0	1	1	1	0	2	0
617	1	50	0	1.73	84.3	0	28.2	4	0	0	1	0	115	70	0	0	1	0	0	0	0	0	0	1	1	0	1	1	0	0	0	1	0	1	0	1	0	0	0	0	1	1	0	1	0	0	0	1	0
625	1	60	0	1.63	65.9	0	24.8	4	0	0	1	0	120	80	0	0	0	0	0	0	0	0	0	3	3	0	1	1	0	0	0	1	0	1	0	1	0	1	0	0	1	0	0	1	0	0	0	1	0
632	1	58	0	1.65	58	1	21.3	1	1	0	0	0	110	70	0	0	0	0	0	0	0	0	0	3	3	0	1	1	0	0	0	1	0	1	0	1	0	1	0	0	1	0	0	1	0	0	0	2	0
633	1	61	0	1.71	72.3	0	24.7	1	1	0	0	0	130	80	0	0	0	0	0	0	0	0	0	3	3	0	1	0	1	0	0	1	0	1	0	1	0	1	0	0	0	0	0	1	0	0	0	3	0
649	1	62	0	1.74	65	0	21.5	1	1	0	0	0	143	90	0	0	0	0	0	0	0	0	0	1	2	0	1	0	1	0	0	1	0	1	0	1	0	1	0	0	1	0	0	1	0	0	0	2	0
663	1	60	0	1.67	81.8	0	29.3	3	0	0	0	1	151	82	0	0	0	0	0	1	0	0	0	3	3	0	1	1	0	0	0	1	0	1	0	1	0	0	0	0	0	0	0	1	0	0	0	1	0
668	1	52	0	1.78	72	0	22.7	2	0	1	0	0	118	90	0	0	0	0	0	0	0	0	0	1	3	0	1	1	0	0	0	0	0	1	0	1	1	0	0	0	1	0	0	1	0	0	0	1	0
674	1	55	0	1.68	64	0	22.7	1	1	0	0	0	120	80	0	0	0	0	0	0	0	0	0	3	3	0	1	1	0	0	0	0	0	0	0	1	0	0	0	0	1	0	0	1	0	0	0	2	0
691	1	37	0	1.7	80	0	27.7	4	0	0	1	0	124	87	0	0	0	0	0	0	0	0	0	2	3	0	1	0	1	0	0	1	0	1	0	1	0	0	0	0	1	0	0	1	0	0	0	1	0
705	1	54	0	1.65	65	0	23.9	4	0	0	1	0	110	62	0	0	0	0	0	0	0	0	0	1	1	0	1	0	1	0	0	1	0	1	0	1	1	0	0	0	1	0	0	1	0	0	0	1	0
723	1	41	0	1.67	73	0	26.2	4	0	0	1	0	118	73	0	0	1	0	0	0	0	0	0	3	3	0	1	0	1	0	0	1	0	1	0	1	0	0	0	0	1	0	0	0	1	0	0	3	0
740	1	54	0	1.7	65	0	22.5	4	0	0	1	0	110	68	0	0	0	0	0	0	0	0	0	1	2	0	1	1	0	0	0	1	0	1	0	0	1	0	0	0	1	0	0	1	0	0	0	3	0
743	1	42	0	1.78	82.7	0	26.1	1	1	0	0	0	118	90	0	0	1	0	0	0	0	0	0	1	3	0	1	1	0	0	0	0	0	1	0	1	0	1	0	0	0	0	0	0	1	0	0	3	0
746	1	38	0	1.71	85	0	29.1	4	0	0	1	0	120	80	0	0	0	0	0	0	0	0	0	3	3	0	1	0	1	0	0	1	0	1	0	1	1	0	0	0	1	0	0	0	1	0	0	1	0
763	2	42	0	1.62	64	0	24.4	4	0	0	1	0	130	70	0	0	0	1	0	0	0	0	0	1	1	0	1	1	0	0	0	1	0	1	0	1	0	0	0	1	0	0	0	1	0	0	0	2	0
769	1	51	0	1.72	80	0	27	1	1	0	0	0	158	98	0	0	0	0	0	1	0	0	0	1	3	0	1	1	0	0	0	1	0	1	1	1	0	1	0	0	0	0	0	1	0	0	0	3	0
777	1	51	0	1.7	77	0	26.6	4	0	0	1	0	110	74	0	0	0	0	0	0	0	0	0	3	3	0	1	1	0	0	0	1	0	1	0	1	0	0	0	0	1	0	0	0	1	0	0	2	0
792	1	52	0	1.7	67	0	23.2	4	0	0	1	0	112	60	0	0	0	0	0	0	0	0	0	3	3	0	1	1	0	0	0	0	0	0	0	1	1	0	0	0	1	0	0	1	0	0	0	2	0
811	1	46	0	1.6	60	0	23.4	1	1	0	0	0	116	80	0	0	0	0	0	0	0	0	0	1	3	0	1	1	0	0	0	0	0	1	0	1	0	0	0	0	1	0	0	1	0	0	0	1	0
814	1	66	0	1.67	64	0	23	3	0	0	0	1	138	80	0	0	0	0	0	0	0	0	0	1	1	0	1	1	0	0	0	1	0	1	0	1	0	0	0	0	1	0	0	0	1	0	0	2	0
869	1	56	0	1.77	90	0	28.7	4	0	0	1	0	107	84	0	0	0	0	0	0	0	0	0	3	3	0	1	0	1	0	0	1	0	0	0	1	0	0	0	0	1	0	0	0	1	0	0	2	0
895	1	61	0	1.62	70	0	26.7	1	1	0	0	0	121	74	0	0	0	0	0	1	1	0	0	3	3	0	1	1	0	0	0	1	0	1	0	0	0	1	0	0	1	0	1	0	1	0	0	3	0
897	1	59	0	1.58	70	0	28	4	0	0	1	0	113	79	0	0	0	0	0	1	1	1	0	3	2	0	1	0	1	0	0	1	0	1	0	1	0	0	0	0	1	0	0	1	0	0	0	3	0
930	1	62	0	1.6	66.6	0	26	1	1	0	0	0	140	90	0	0	0	0	0	0	1	0	0	3	3	0	1	1	0	0	0	0	0	0	0	1	1	1	0	0	1	0	1	0	1	0	0	2	0
940	1	71	0	1.68	66.5	0	23.6	1	1	0	0	0	120	66	0	0	0	0	0	1	0	0	0	1	1	0	1	1	0	0	0	1	0	0	0	1	0	0	0	0	1	0	0	0	1	0	0	1	0
943	1	49	0	1.7	80	0	27.7	4	0	0	1	0	112	69	0	0	0	0	0	0	0	0	0	3	3	0	1	1	0	0	0	1	0	1	0	1	0	0	0	0	1	0	0	0	1	0	0	1	0
948	1	63	0	1.62	60	0	22.9	1	1	0	0	0	138	64	0	0	0	0	0	1	0	0	0	1	3	0	1	1	0	0	0	0	0	0	1	1	0	0	0	0	0	0	0	0	1	0	0	2	0
954	1	60	0	1.65	66	0	24.2	1	1	0	0	0	120	80	0	0	0	0	0	0	0	0	0	1	3	0	1	1	0	0	0	1	0	1	0	1	0	1	0	0	0	0	0	0	1	0	0	1	0
955	1	55	0	1.64	64	0	23.8	4	0	0	1	0	108	67	0	0	0	0	0	0	0	0	0	2	3	0	1	0	1	0	0	1	0	1	0	1	0	0	0	1	1	0	0	0	1	0	0	3	0
976	1	54	0	1.68	79.5	0	28.2	5	0	0	0	1	110	75	0	1	0	0	0	0	0	0	0	1	3	0	1	1	0	0	0	0	0	0	0	1	0	1	0	0	0	0	0	0	1	0	0	2	0
978	1	54	0	1.6	67.8	0	26.5	1	1	0	0	0	132	75	0	0	0	0	0	1	0	0	0	1	3	0	1	1	0	0	0	0	0	1	0	1	0	1	0	0	0	0	0	0	1	0	0	3	0
980	1	39	0	1.66	78	0	28.3	4	0	0	1	0	98	62	0	0	0	0	0	0	0	0	0	1	1	0	1	1	0	0	0	0	0	1	0	1	0	1	0	0	1	0	0	0	1	0	0	1	0
987	1	61	0	1.68	67.8	0	24	1	1	0	0	0	120	70	0	0	0	0	0	0	0	0	0	2	3	0	1	1	0	0	0	1	0	1	0	1	0	0	0	0	1	0	0	0	1	0	0	3	0
989	1	67	0	1.7	62	0	21.5	1	1	0	0	0	120	80	0	0	0	1	0	0	0	0	0	3	3	0	1	0	1	0	0	1	0	1	0	1	0	1	0	0	1	0	0	1	0	0	0	3	0
1005	1	41	0	1.58	68	0	27.2	3	0	0	0	1	142	90	0	0	0	0	0	1	0	0	0	1	2	0	1	1	0	0	0	1	0	1	0	1	0	0	0	0	0	0	0	1	0	0	0	1	0
1033	1	50	0	1.63	56	1	21.1	5	0	0	0	1	110	60	0	0	0	0	0	0	0	0	0	3	3	0	1	1	0	0	0	1	0	0	0	1	0	0	0	0	1	0	0	0	1	0	0	1	0
1040	1	60	0	1.67	80	0	28.7	4	0	0	1	0	106	56	0	0	0	0	0	0	0	0	0	1	3	0	1	1	0	0	0	1	0	1	0	1	1	0	0	0	1	0	0	0	1	0	0	2	0
1057	1	50	0	1.7	65	0	22.5	1	1	0	0	0	128	70	0	0	0	0	0	0	0	0	0	3	3	0	1	1	0	0	0	0	0	0	0	1	0	1	0	0	1	0	0	1	0	0	0	1	0
1073	1	69	0	1.7	77.8	0	26.9	1	1	0	0	0	127	61	0	0	1	0	0	0	0	0	0	3	3	0	1	1	0	0	0	0	0	0	0	1	0	0	0	0	0	1	0	0	1	0	0	2	0
1080	1	65	0	1.62	64.2	0	24.5	2	0	1	0	0	118	70	0	0	0	0	0	0	1	0	0	1	2	0	1	1	0	0	0	0	0	1	0	1	0	0	0	0	0	0	0	0	1	0	0	3	0
[truncated: 26 more columns]
